# Supplementary material
Source: PubMed Central journal article supplement (PMC3186066)
Supplement: NIHMS86725-supplement-1_si_001.pdf [file NIHMS86725-supplement-1_si_001.pdf]

**Supporting Information for**

**Marinisorolides, New Polyene-Polyol Macrolides from a Marine Actinomycete**

**of New Genus “*Marinispora*”**

*Hak Cheol Kwon, Christopher A. Kauffman, Paul R. Jensen, William Fenical\**

Center for Marine Biotechnology and Biomedicine  
Scripps Institution of Oceanography, University of California at San Diego  
La Jolla, CA 92093-0204, USA

wfenical@ucsd.edu

## Table of Contents

|                                                                                                                                                                                           |     |
|-------------------------------------------------------------------------------------------------------------------------------------------------------------------------------------------|-----|
| General Experimental Procedures. ....                                                                                                                                                     | S4  |
| <b>Table S1.</b> <sup>13</sup> C NMR data of diastereomers of 6-methyl-decane-1,5,7-triol (DMSO- <i>d</i> <sub>6</sub> ). ....                                                            | S5  |
| <b>Figure S1.</b> Key ROESY NMR correlation of compounds <b>1</b> and <b>7</b> . ....                                                                                                     | S6  |
| <b>Figure S2.</b> Proton chemical shifts in <sup>1</sup> H NMR spectra of <b>9a</b> [( <i>S</i> )-Mosher ester of <b>8</b> ] and <b>9b</b> [( <i>R</i> )-Mosher ester of <b>8</b> ]. .... | S6  |
| <b>Figure S3.</b> Key ROESY NMR correlation of compounds <b>2</b> , <b>3</b> and <b>4</b> . ....                                                                                          | S7  |
| <b>Figure S4.</b> HPLC chromatogram of <b>1</b> and isomers of <b>1</b> derived from the photochemical conversion of <b>1</b> for one and two hours. ....                                 | S8  |
| <b>Figure S5.</b> HPLC chromatogram of <b>2</b> and isomers of <b>2</b> derived from the photochemical conversion of <b>2</b> for one and two hours. ....                                 | S9  |
| <b>Figure S6.</b> UV (MeOH) and HR-ESI-TOF MS spectra of marinisporolide A ( <b>1</b> ) ....                                                                                              | S10 |
| <b>Figure S7.</b> <sup>1</sup> H NMR spectrum of marinisporolide A ( <b>1</b> ) (500 MHz, DMSO- <i>d</i> <sub>6</sub> ). ....                                                             | S11 |
| <b>Figure S8.</b> <sup>13</sup> C NMR spectrum of <b>1</b> (75 MHz, DMSO- <i>d</i> <sub>6</sub> ). ....                                                                                   | S12 |
| <b>Figure S9.</b> Homo 2D <i>J</i> -resolved <sup>1</sup> H NMR spectrum of <b>1</b> (500 MHz, DMSO- <i>d</i> <sub>6</sub> ). ....                                                        | S13 |
| <b>Figure S10.</b> <sup>1</sup> H- <sup>1</sup> H COSY spectrum of <b>1</b> (500 MHz, DMSO- <i>d</i> <sub>6</sub> ). ....                                                                 | S14 |
| <b>Figure S11.</b> gHMQC spectrum of <b>1</b> (500 MHz, DMSO- <i>d</i> <sub>6</sub> ) ....                                                                                                | S15 |
| <b>Figure S12.</b> gHMBC spectrum of <b>1</b> (500 MHz, DMSO- <i>d</i> <sub>6</sub> ) ....                                                                                                | S16 |
| <b>Figure S13.</b> ROESY spectrum of <b>1</b> (500 MHz, DMSO- <i>d</i> <sub>6</sub> ) ....                                                                                                | S17 |
| <b>Figure S14.</b> UV and ESI-MS spectra derived from HPLC-DAD-MSD (MeCN-H <sub>2</sub> O) of compound <b>1</b> . ....                                                                    | S18 |
| <b>Figure S15.</b> <sup>1</sup> H NMR spectrum of compound <b>1</b> (500 MHz, DMSO- <i>d</i> <sub>6</sub> ) ....                                                                          | S19 |
| <b>Figure S16.</b> UV (MeOH) and HR-ESI-TOF MS spectra of marinisporolide B ( <b>2</b> ) ....                                                                                             | S20 |
| <b>Figure S17.</b> <sup>1</sup> H NMR spectrum of marinisporolide B ( <b>2</b> ) (500 MHz, DMSO- <i>d</i> <sub>6</sub> ) ....                                                             | S21 |
| <b>Figure S18.</b> <sup>13</sup> C NMR spectrum of <b>2</b> (75 MHz, DMSO- <i>d</i> <sub>6</sub> ). ....                                                                                  | S22 |
| <b>Figure S19.</b> <sup>1</sup> H- <sup>1</sup> H COSY spectrum of <b>2</b> (500 MHz, DMSO- <i>d</i> <sub>6</sub> ) ....                                                                  | S23 |
| <b>Figure S20.</b> gHMQC spectrum of <b>2</b> (500 MHz, DMSO- <i>d</i> <sub>6</sub> ) ....                                                                                                | S24 |
| <b>Figure S21.</b> gHMBC spectrum of <b>2</b> (500 MHz, DMSO- <i>d</i> <sub>6</sub> ) ....                                                                                                | S25 |
| <b>Figure S22.</b> ROESY spectrum of <b>2</b> (500 MHz, DMSO- <i>d</i> <sub>6</sub> ) ....                                                                                                | S26 |
| <b>Figure S23.</b> UV (MeOH) and HR-ESI-TOF MS spectra of marinisporolide C ( <b>3</b> ).....                                                                                             | S27 |
| <b>Figure S24.</b> <sup>1</sup> H NMR spectrum of marinisporolide C ( <b>3</b> ) (500 MHz, DMSO- <i>d</i> <sub>6</sub> ). ....                                                            | S28 |

|                                                                                                                                                          |     |
|----------------------------------------------------------------------------------------------------------------------------------------------------------|-----|
| <b>Figure S25.</b> $^{13}\text{C}$ NMR spectrum of <b>3</b> (75 MHz, $\text{DMSO-}d_6$ ) .....                                                           | S29 |
| <b>Figure S26.</b> $^1\text{H}$ NMR spectrum of <b>3</b> (500 MHz, pyridine- $d_5$ ). .....                                                              | S30 |
| <b>Figure S27.</b> $^{13}\text{C}$ NMR spectrum of <b>3</b> (125 MHz, pyridine- $d_5$ ). .....                                                           | S31 |
| <b>Figure S28.</b> Expanded homo 2D $J$ -resolved $^1\text{H}$ NMR spectrum of <b>3</b> (500 MHz, pyridine- $d_5$ ). .....                               | S32 |
| <b>Figure S29.</b> ROESY spectrum of <b>3</b> (500 MHz, pyridine- $d_5$ ) .....                                                                          | S33 |
| <b>Figure S30.</b> UV and ESI-MS spectra derived from HPLC-DAD-MSD ( $\text{MeCN-H}_2\text{O}$ ) of marinisporolide D ( <b>4</b> ) .....                 | S34 |
| <b>Figure S31.</b> $^1\text{H}$ NMR spectrum of marinisporolide D ( <b>4</b> ) (500 MHz, pyridine- $d_5$ ) .....                                         | S35 |
| <b>Figure S32.</b> $^{13}\text{C}$ NMR spectrum of <b>4</b> (125 MHz, pyridine- $d_5$ ) .....                                                            | S36 |
| <b>Figure S33.</b> Homo 2D $J$ -resolved $^1\text{H}$ NMR spectrum of <b>4</b> (500 MHz, pyridine- $d_5$ ). .....                                        | S37 |
| <b>Figure S34.</b> ROESY spectrum of <b>4</b> (500 MHz, pyridine- $d_5$ ) .....                                                                          | S38 |
| <b>Figure S35.</b> UV and ESI-MS spectra derived from HPLC-DAD-MSD ( $\text{MeCN-H}_2\text{O}$ ) of marinisporolide E ( <b>5</b> ) .....                 | S39 |
| <b>Figure S36.</b> $^1\text{H}$ NMR spectrum of marinisporolide E ( <b>5</b> ) (500 MHz, pyridine- $d_5$ ). .....                                        | S40 |
| <b>Figure S37.</b> gHMQC spectrum of <b>5</b> (500 MHz, pyridine- $d_5$ ). .....                                                                         | S41 |
| <b>Figure S38.</b> Expanded homo 2D $J$ -resolved $^1\text{H}$ NMR spectrum of <b>5</b> (500 MHz, pyridine- $d_5$ ). .....                               | S42 |
| <b>Figure S39.</b> ROESY spectrum of <b>5</b> (500 MHz, pyridine- $d_5$ ). .....                                                                         | S43 |
| <b>Figure S40.</b> UV and ESI-MS spectra derived from HPLC-DAD-MSD of compound <b>6</b> . .....                                                          | S44 |
| <b>Figure S41.</b> $^1\text{H}$ NMR spectrum of <b>6</b> (500 MHz, $\text{DMSO-}d_6$ ) .....                                                             | S45 |
| <b>Figure S42.</b> Expanded gHMQC spectrum (500 MHz, $\text{DMSO-}d_6$ ) and $^{13}\text{C}$ NMR spectrum (75 MHz, $\text{DMSO-}d_6$ ) of <b>6</b> ..... | S46 |
| <b>Figure S43.</b> UV and ESI-MS spectra derived from HPLC-DAD-MSD of compound <b>7</b> . .....                                                          | S47 |
| <b>Figure S44.</b> $^1\text{H}$ NMR spectrum of <b>7</b> (500 MHz, $\text{CD}_3\text{CN}$ ). .....                                                       | S48 |
| <b>Figure S45.</b> $^{13}\text{C}$ NMR spectrum of <b>7</b> (75 MHz, $\text{CD}_3\text{CN}$ ). .....                                                     | S49 |
| <b>Figure S46.</b> gHMQC spectrum of <b>7</b> (500 MHz, $\text{CD}_3\text{CN}$ ). .....                                                                  | S50 |
| <b>Figure S47.</b> ROESY spectrum of <b>7</b> (500 MHz, $\text{CD}_3\text{CN}$ ). .....                                                                  | S51 |
| <b>Figure S48.</b> UV and ESI-MS spectra derived from HPLC-DAD-MSD of compound <b>8</b> . .....                                                          | S52 |
| <b>Figure S49.</b> $^1\text{H}$ NMR spectrum of <b>8</b> (500 MHz, $\text{CD}_3\text{CN}$ ). .....                                                       | S53 |
| <b>Figure S50.</b> UV and ESI-MS spectra derived from HPLC-DAD-MSD of compound <b>9a</b> . .....                                                         | S54 |
| <b>Figure S51.</b> $^1\text{H}$ NMR spectrum of <b>9a</b> (500 MHz, $\text{CD}_3\text{CN}$ ). .....                                                      | S55 |
| <b>Figure S52.</b> $^1\text{H-}^1\text{H}$ COSY spectrum of <b>9a</b> (500 MHz, $\text{CD}_3\text{CN}$ ). .....                                          | S56 |
| <b>Figure S53.</b> UV and ESI-MS spectra derived from HPLC-DAD-MSD ( $\text{MeCN-H}_2\text{O}$ ) of compound <b>9b</b> . .....                           | S57 |

|                                                                                                                                |     |
|--------------------------------------------------------------------------------------------------------------------------------|-----|
| <b>Figure S54.</b> $^1\text{H}$ NMR spectrum of <b>9b</b> (500 MHz, $\text{CD}_3\text{CN}$ ). .....                            | S58 |
| <b>Figure S55.</b> $^1\text{H}$ - $^1\text{H}$ COSY spectrum of <b>9b</b> (500 MHz, $\text{CD}_3\text{CN}$ ). .....            | S59 |
| <b>Figure S56.</b> UV and ESI-MS spectra derived from HPLC-DAD-MSD ( $\text{MeCN-H}_2\text{O}$ ) of compound <b>10</b> . ..... | S60 |
| <b>Figure S57.</b> $^1\text{H}$ NMR spectrum of compound <b>10</b> (500 MHz, $\text{DMSO-}d_6$ ). .....                        | S61 |
| <b>Figure S58.</b> Expanded gHMQC spectrum of <b>10</b> (500 MHz, $\text{DMSO-}d_6$ ). .....                                   | S62 |
| <b>Figure S59.</b> CD spectra of <b>1</b> , synthetic <b>1</b> , <b>2</b> , and <b>3</b> in methanol. .....                    | S63 |

**General Experimental Procedures.**  $^1\text{H}$  NMR and 2D NMR spectra were obtained in  $\text{DMSO-}d_6$ ,  $\text{pyridine-}d_5$ , or  $\text{CD}_3\text{CN}$  at 500 MHz.  $^{13}\text{C}$  NMR spectra were obtained at 75 MHz or 125 MHz. HR-ESI-TOF MS data were obtained at the Scripps Research Institute, La Jolla, CA. Semi preparative reversed-phase HPLC separations were performed using a Varian Dynamax<sup>®</sup> C-18 column (250 x 10 mm) and a Phenomenex Luna<sup>®</sup> 5u C-8(2) column (250 x 10 mm) at a flow rate of 2 mL/min using a Waters refractive index detector. HPLC-MS data were obtained using a Agilent 1100 LC-MS system using a Phenomenex Luna<sup>®</sup> 5u C-18(2) analytical column (100 x 4.6 mm) and Agilent 1050 HPLC system with Kromasil 5u C-18 analytical column (150 x 4.6 mm) were used for the analysis of fractions and reaction mixtures.

**Table S1.**  $^{13}\text{C}$  NMR data of diastereomers of 6-methyl-decane-1,5,7-triol ( $\text{DMSO-}d_6$ )<sup>a</sup>

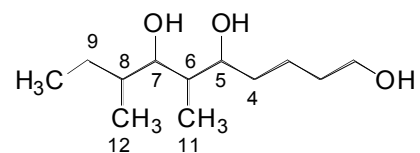

|    | <b>A</b> ( $\alpha\alpha\beta\beta^b$ ) | <b>B</b> ( $\alpha\alpha\alpha\alpha^c$ ) | <b>C</b> ( $\alpha\alpha\beta\alpha^d$ ) | <b>D</b> ( $\alpha\alpha\alpha\beta^e$ ) | <b>E</b> ( $\beta\alpha\beta\beta^f$ ) | <b>F</b> ( $\beta\alpha\alpha\alpha^g$ ) | <b>G</b> ( $\beta\alpha\beta\alpha^h$ ) | <b>H</b> ( $\beta\alpha\alpha\beta^i$ ) |
|----|-----------------------------------------|-------------------------------------------|------------------------------------------|------------------------------------------|----------------------------------------|------------------------------------------|-----------------------------------------|-----------------------------------------|
| 4  | 34.2                                    | 34.8                                      | 34.4                                     | 34.6                                     | 31.5                                   | 33.3                                     | 31.8                                    | 34.2                                    |
| 5  | 69.8                                    | 72.2                                      | 69.8                                     | 73.8                                     | 71.8                                   | 72.0                                     | 71.7                                    | 72.6                                    |
| 6  | 39.5                                    | 38.8                                      | 38.2                                     | 38.2                                     | 41.3                                   | 39.6                                     | 41.1                                    | 38.9                                    |
| 7  | 73.6                                    | 76.0                                      | 77.4                                     | 77.5                                     | 74.9                                   | 73.3                                     | 77.8                                    | 73.3                                    |
| 8  | 34.1                                    | 34.4                                      | 34.7                                     | 35.0                                     | 34.1                                   | 34.8                                     | 34.6                                    | 35.1                                    |
| 9  | 34.0                                    | 33.1                                      | 29.8                                     | 31.5                                     | 32.6                                   | 32.6                                     | 28.6                                    | 32.2                                    |
| 11 | 10.1                                    | 8.1                                       | 10.6                                     | 6.8                                      | 11.2                                   | 10.3                                     | 11.5                                    | 9.8                                     |
| 12 | 12.8                                    | 14.5                                      | 16.9                                     | 15.7                                     | 12.4                                   | 15.5                                     | 17.3                                    | 15.5                                    |

<sup>a</sup> Kobayashi, Y.; Tan, C.-H.; Kishi, Y. *J. Am. Chem. Soc.* **2001**, *123*, 2076-2078; Supporting information <sup>b</sup> 5 $\alpha$ -OH, 6 $\alpha$ -Me, 7 $\beta$ -OH, 8 $\beta$ -Me. <sup>c</sup> 5 $\alpha$ -OH, 6 $\alpha$ -Me, 7 $\alpha$ -OH, 8 $\alpha$ -Me. <sup>d</sup> 5 $\alpha$ -OH, 6 $\alpha$ -Me, 7 $\beta$ -OH, 8 $\alpha$ -Me. <sup>e</sup> 5 $\alpha$ -OH, 6 $\alpha$ -Me, 7 $\alpha$ -OH, 8 $\beta$ -Me. <sup>f</sup> 5 $\beta$ -OH, 6 $\alpha$ -Me, 7 $\beta$ -OH, 8 $\beta$ -Me. <sup>g</sup> 5 $\beta$ -OH, 6 $\alpha$ -Me, 7 $\alpha$ -OH, 8 $\alpha$ -Me. <sup>h</sup> 5 $\beta$ -OH, 6 $\alpha$ -Me, 7 $\beta$ -OH, 8 $\alpha$ -Me. <sup>i</sup> 5 $\beta$ -OH, 6 $\alpha$ -Me, 7 $\alpha$ -OH, 8 $\beta$ -Me.

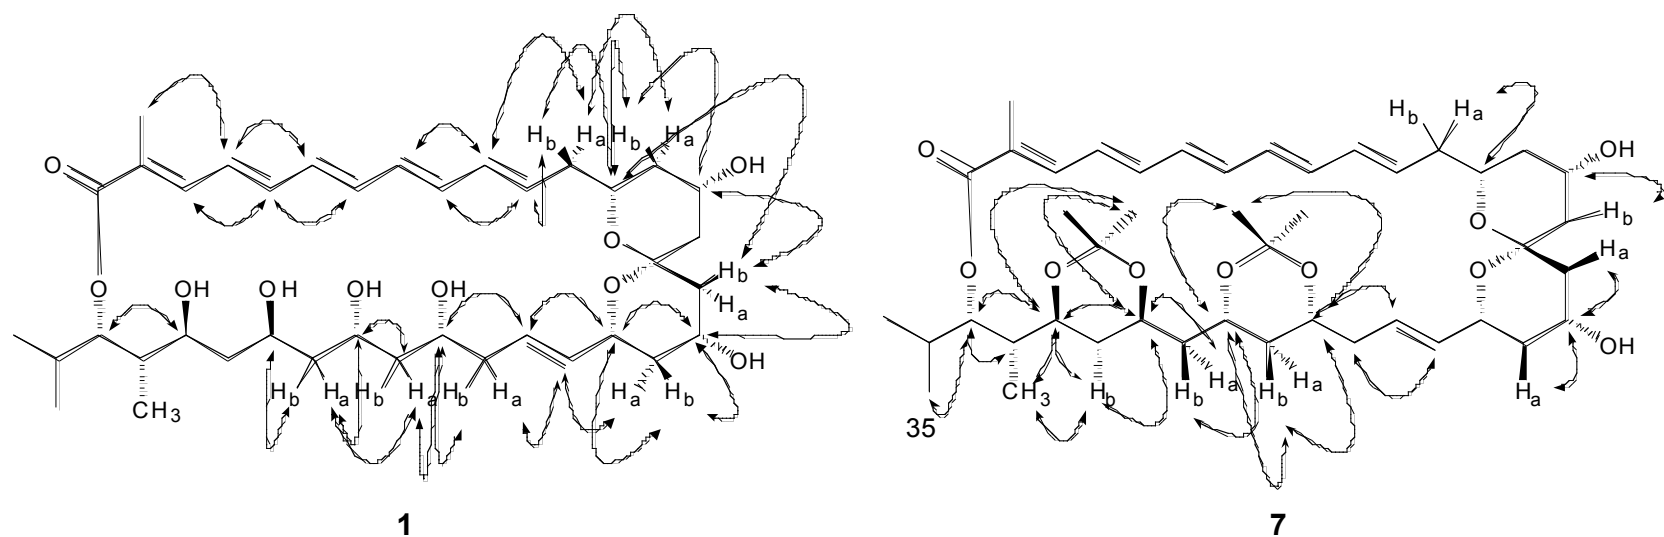

Figure S1. Key ROESY NMR correlation of compounds 1 and 7.

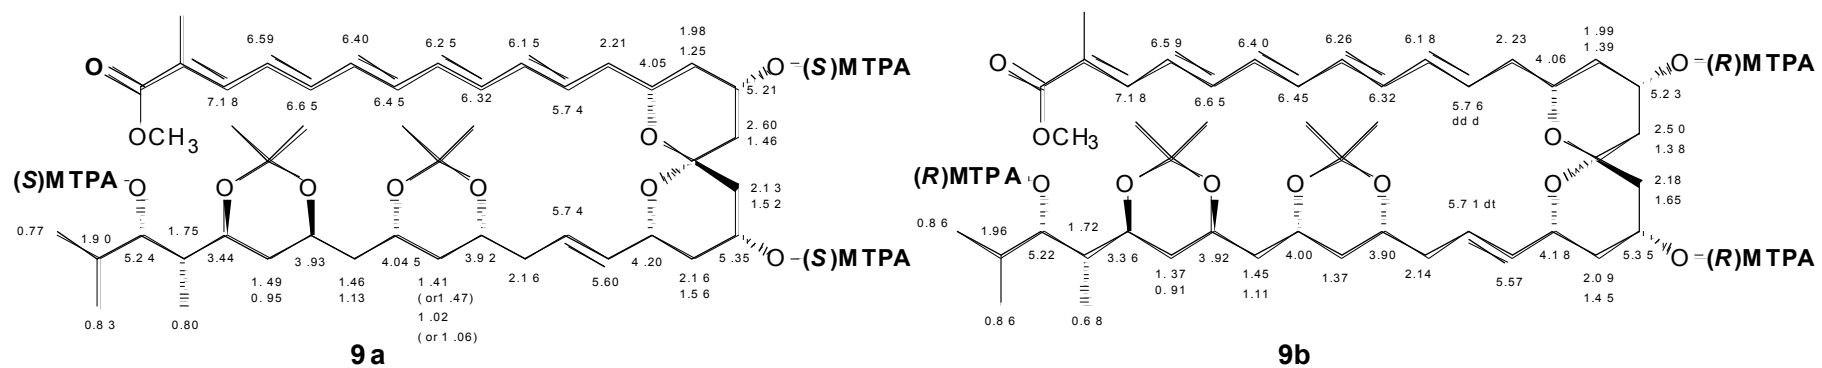

Figure S2. Proton chemical shifts in <sup>1</sup>H NMR spectra of 9a [(S)-Mosher ester of 8] and 9b [(R)-Mosher ester of 8].

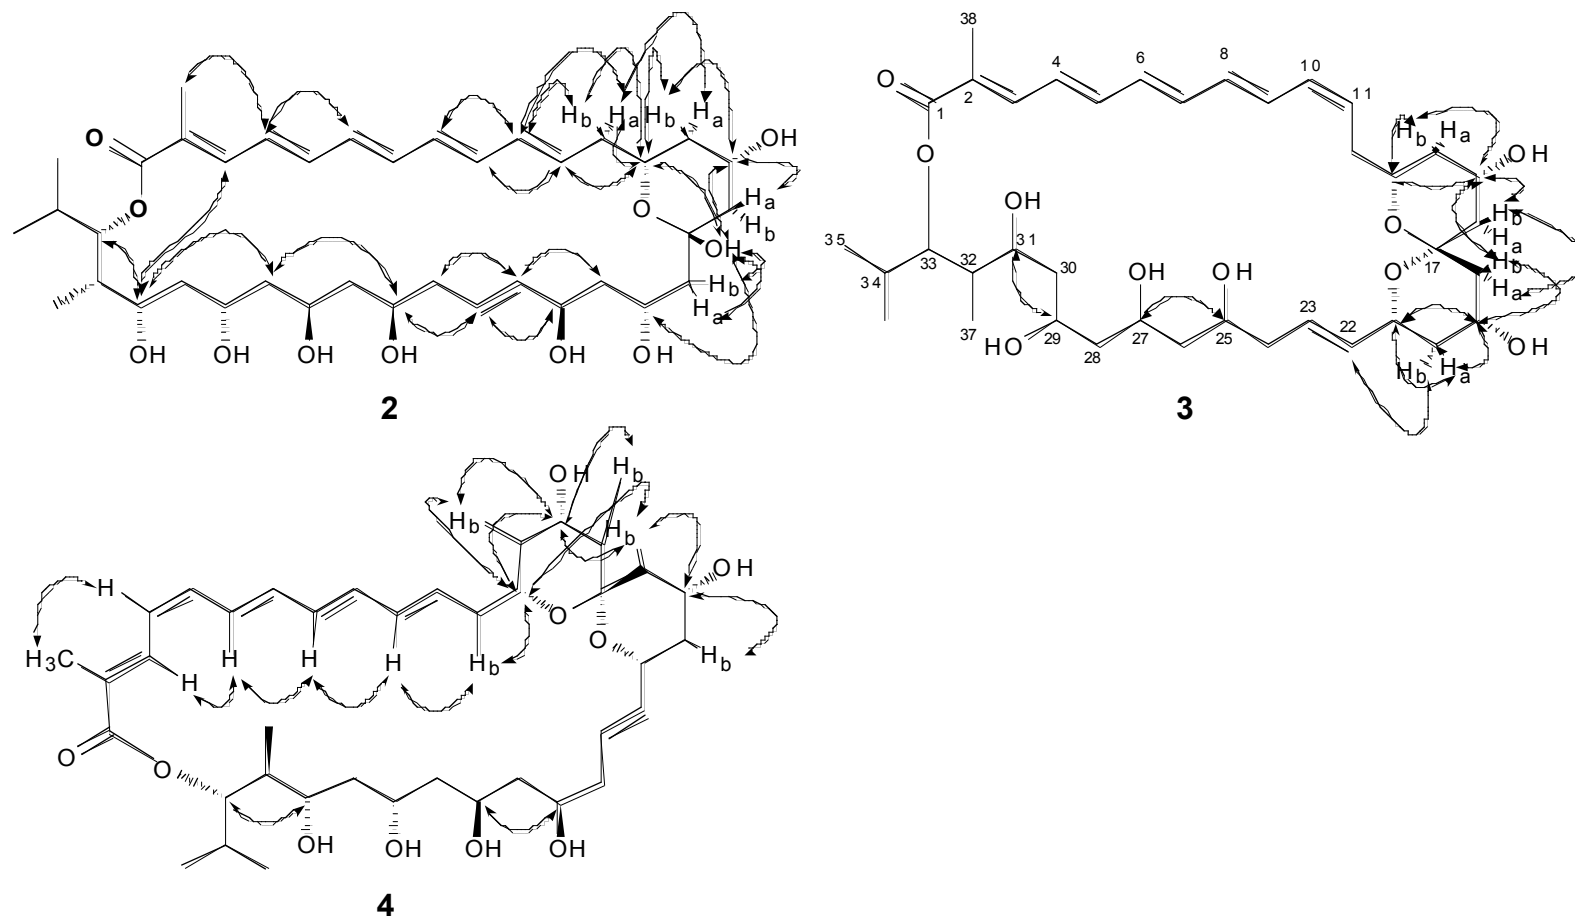

**Figure S3.** Key ROESY NMR correlation of compounds 2, 3 and 4.



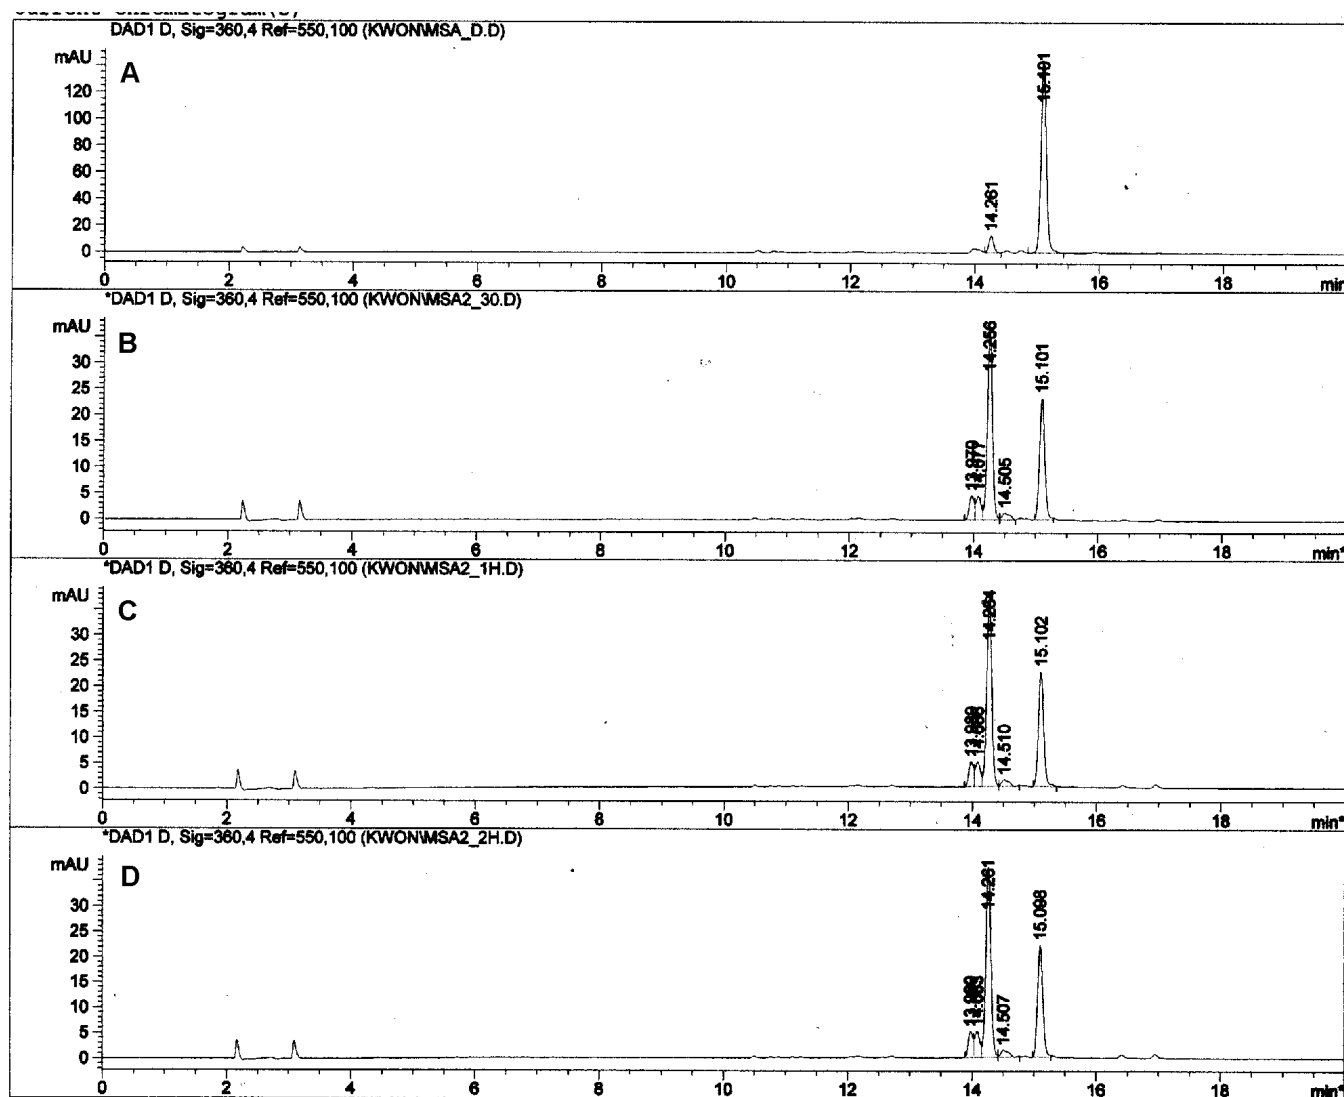

**Figure S4.** HPLC chromatogram of **1** and isomers of **1** derived from the photochemical conversion of **1** for one and two hours. UV detector 360 nm. Retention time 14.0 min – marinisporolide E (**5**); Rt 14.3 min – marinisporolide D (**4**); Rt 14.5 min – marinisporolide C (**3**); Rt 15.1 min – marinisporolide A (**1**). (A) marinisporolide A (**1**) before exposure to light; (B) 30 min after exposure to light; (C) 1 hours; (D) 2 hours.

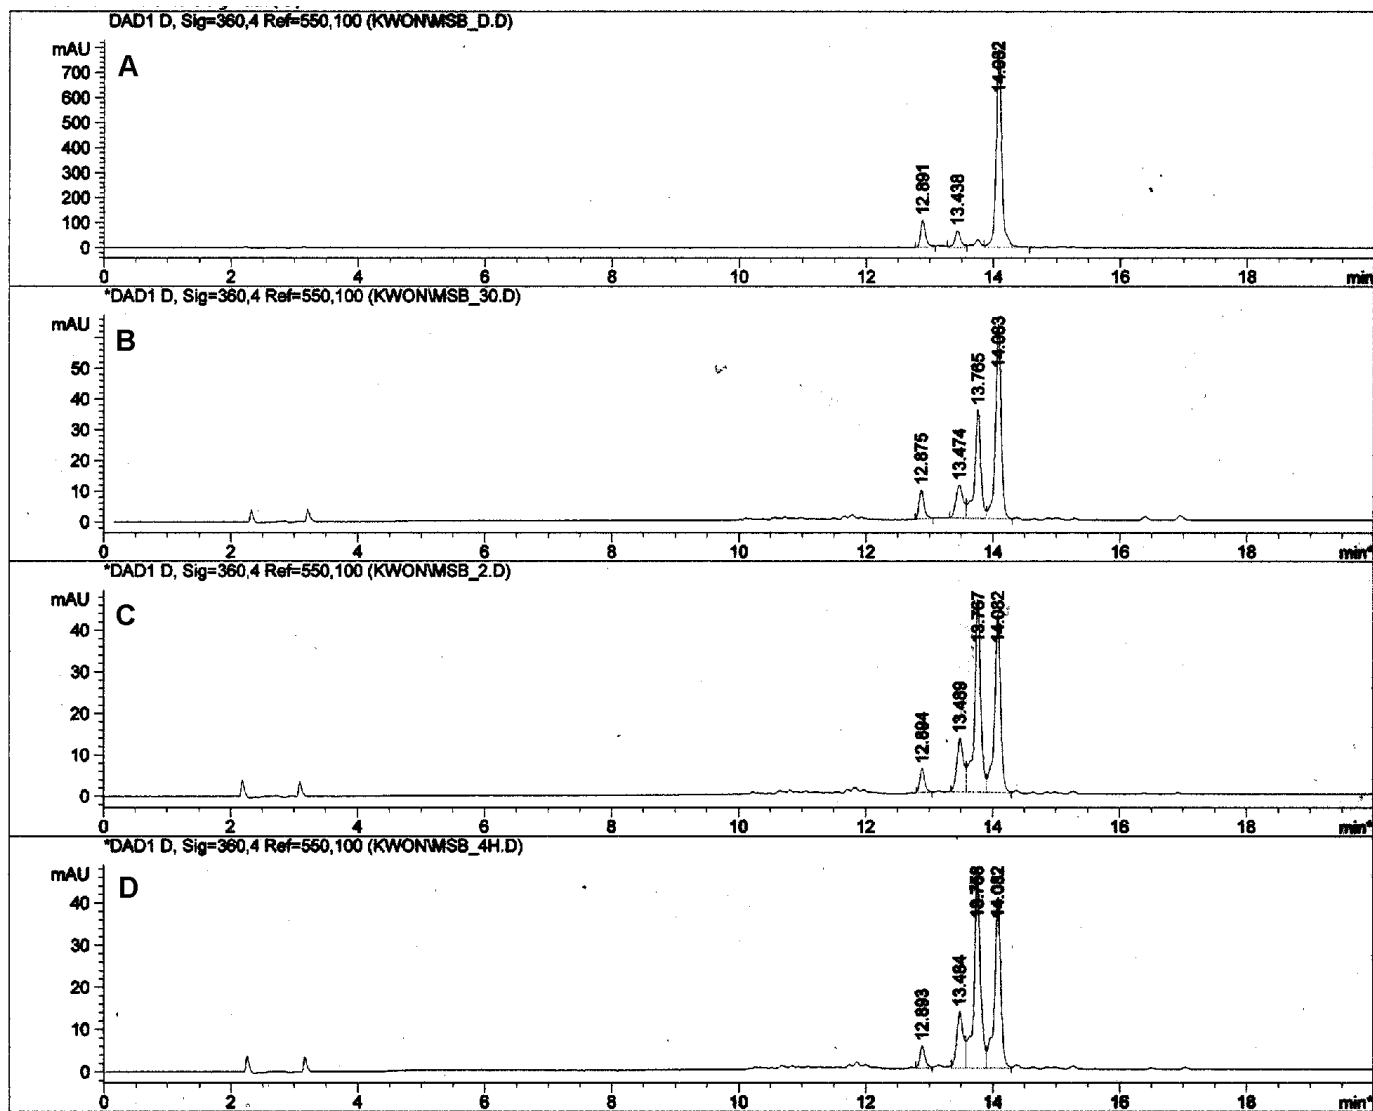

**Figure S5.** HPLC chromatogram of **2** and isomers of **2** derived from the photochemical conversion of **2** for one and two hours. (UV detector 360 nm). Retention time 14.1 min – marinisporolide B (**2**). (A) marinisporolide B (**2**) before exposure to light; (B) 30 min after exposure to light; (C) 2 hours; (D) 4 hours.

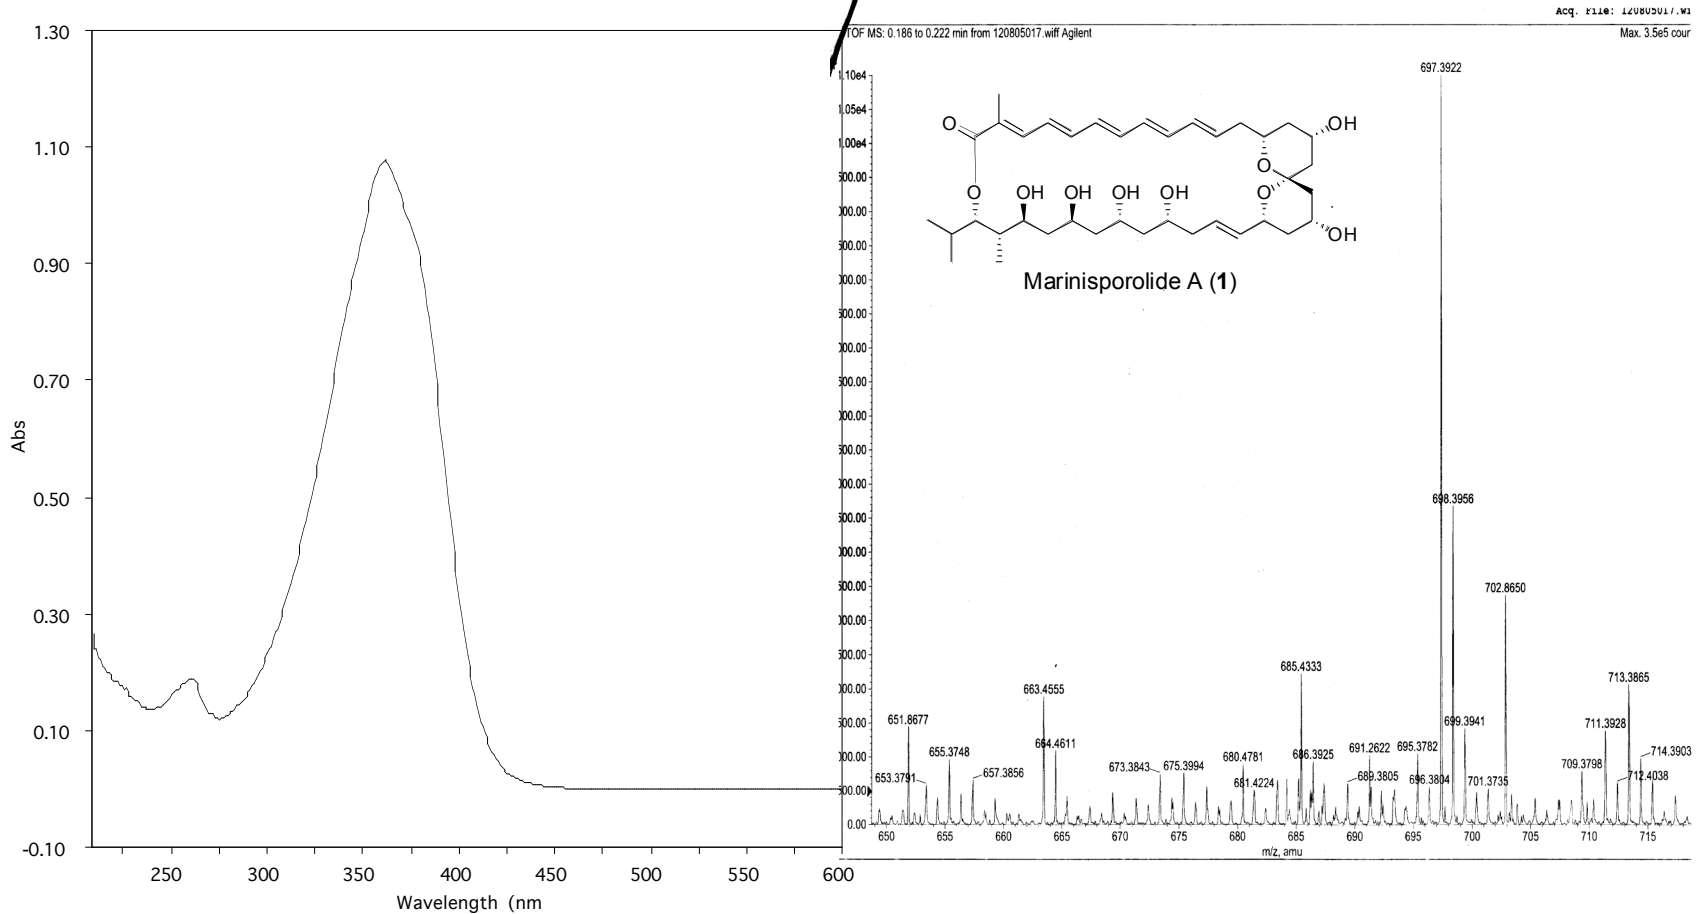

**Figure S6.** UV (MeOH) and HR-ESI-TOF MS spectra of marinisporolide A (1)

Q140\_692\_m2\_B (500 MHz, DMSO-d6)

Archive directory: /export/home/fenical/kwon/vnmrsys/data  
Sample directory: Q140\_692\_m2\_B\_25Jun2005

Pulse Sequence: s2pu1

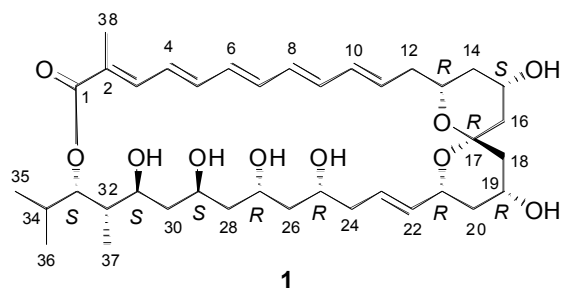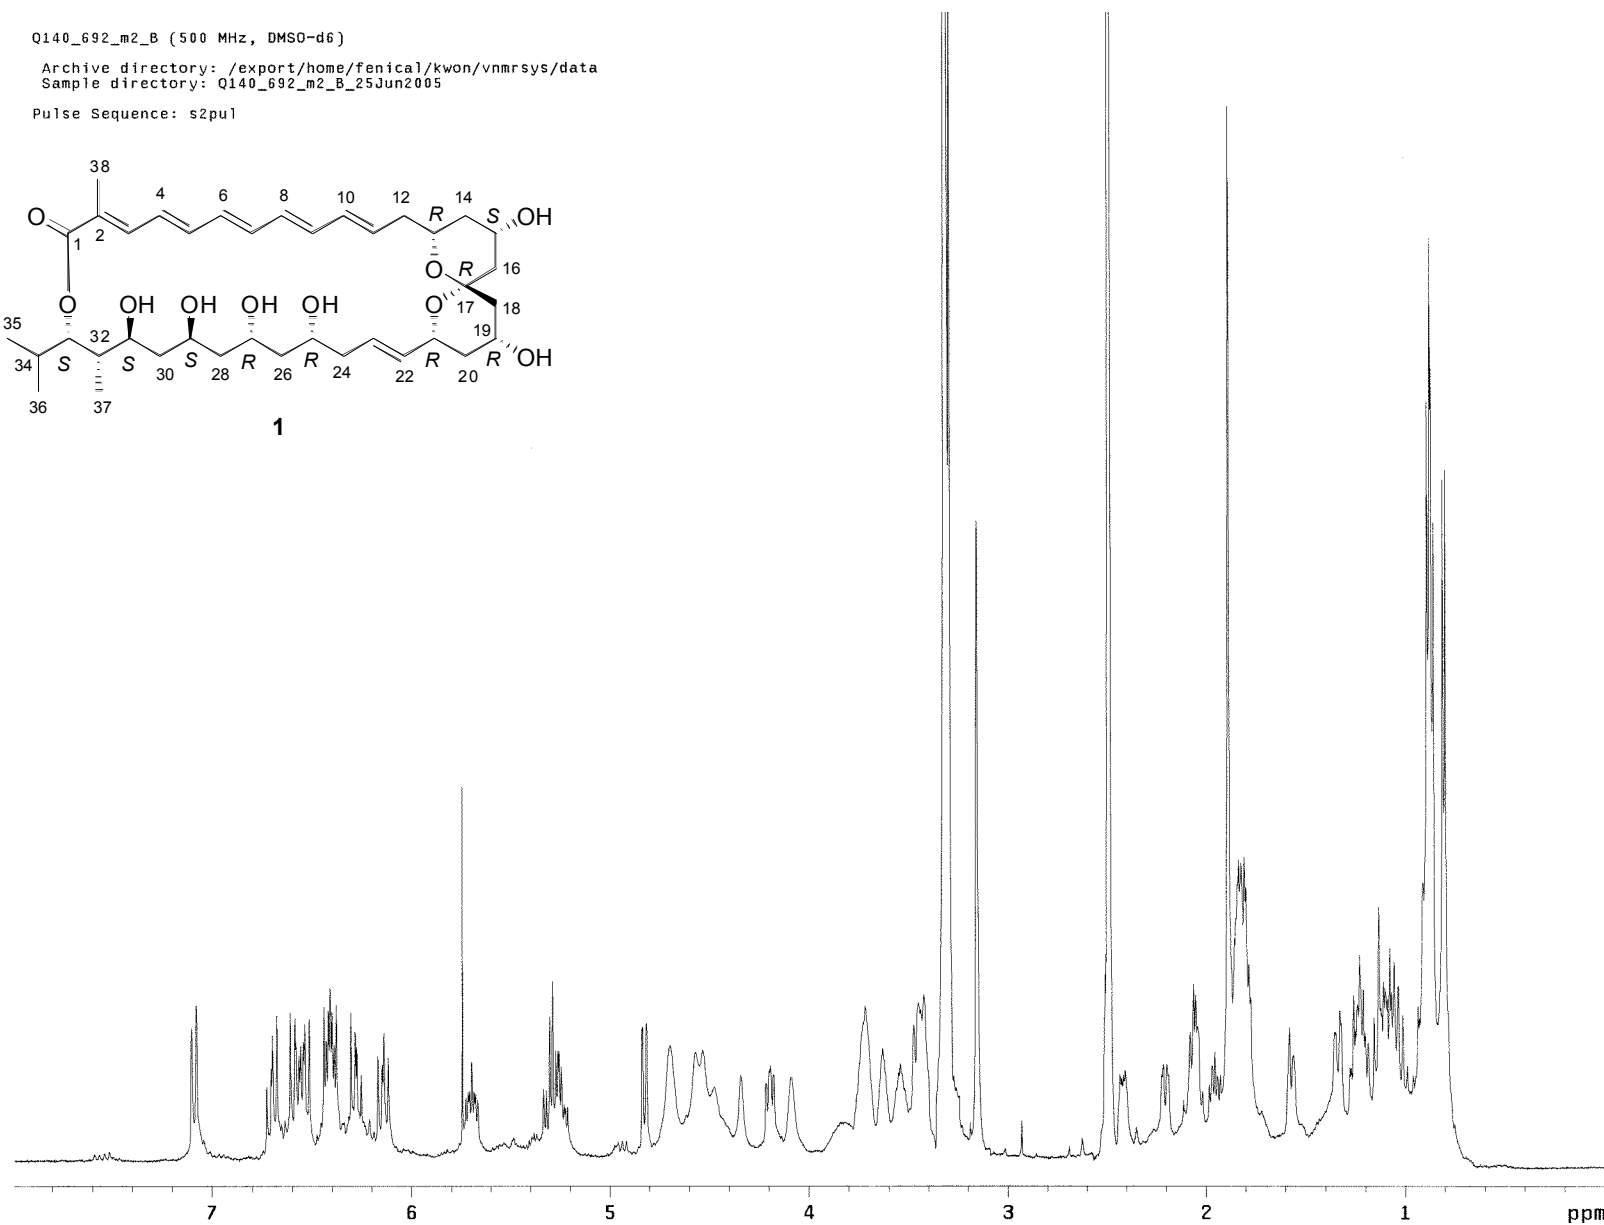

**Figure S7.**  $^1\text{H}$  NMR spectrum of marinisporolide A (**1**) (500 MHz,  $\text{DMSO-}d_6$ )

Q140\_692\_m2\_B\_comp (75 MHz, DMSO-d6)

Pulse Sequence: s2pu1

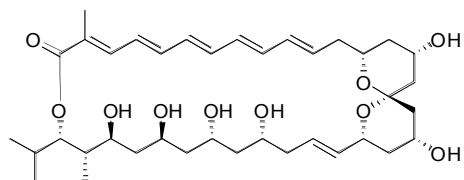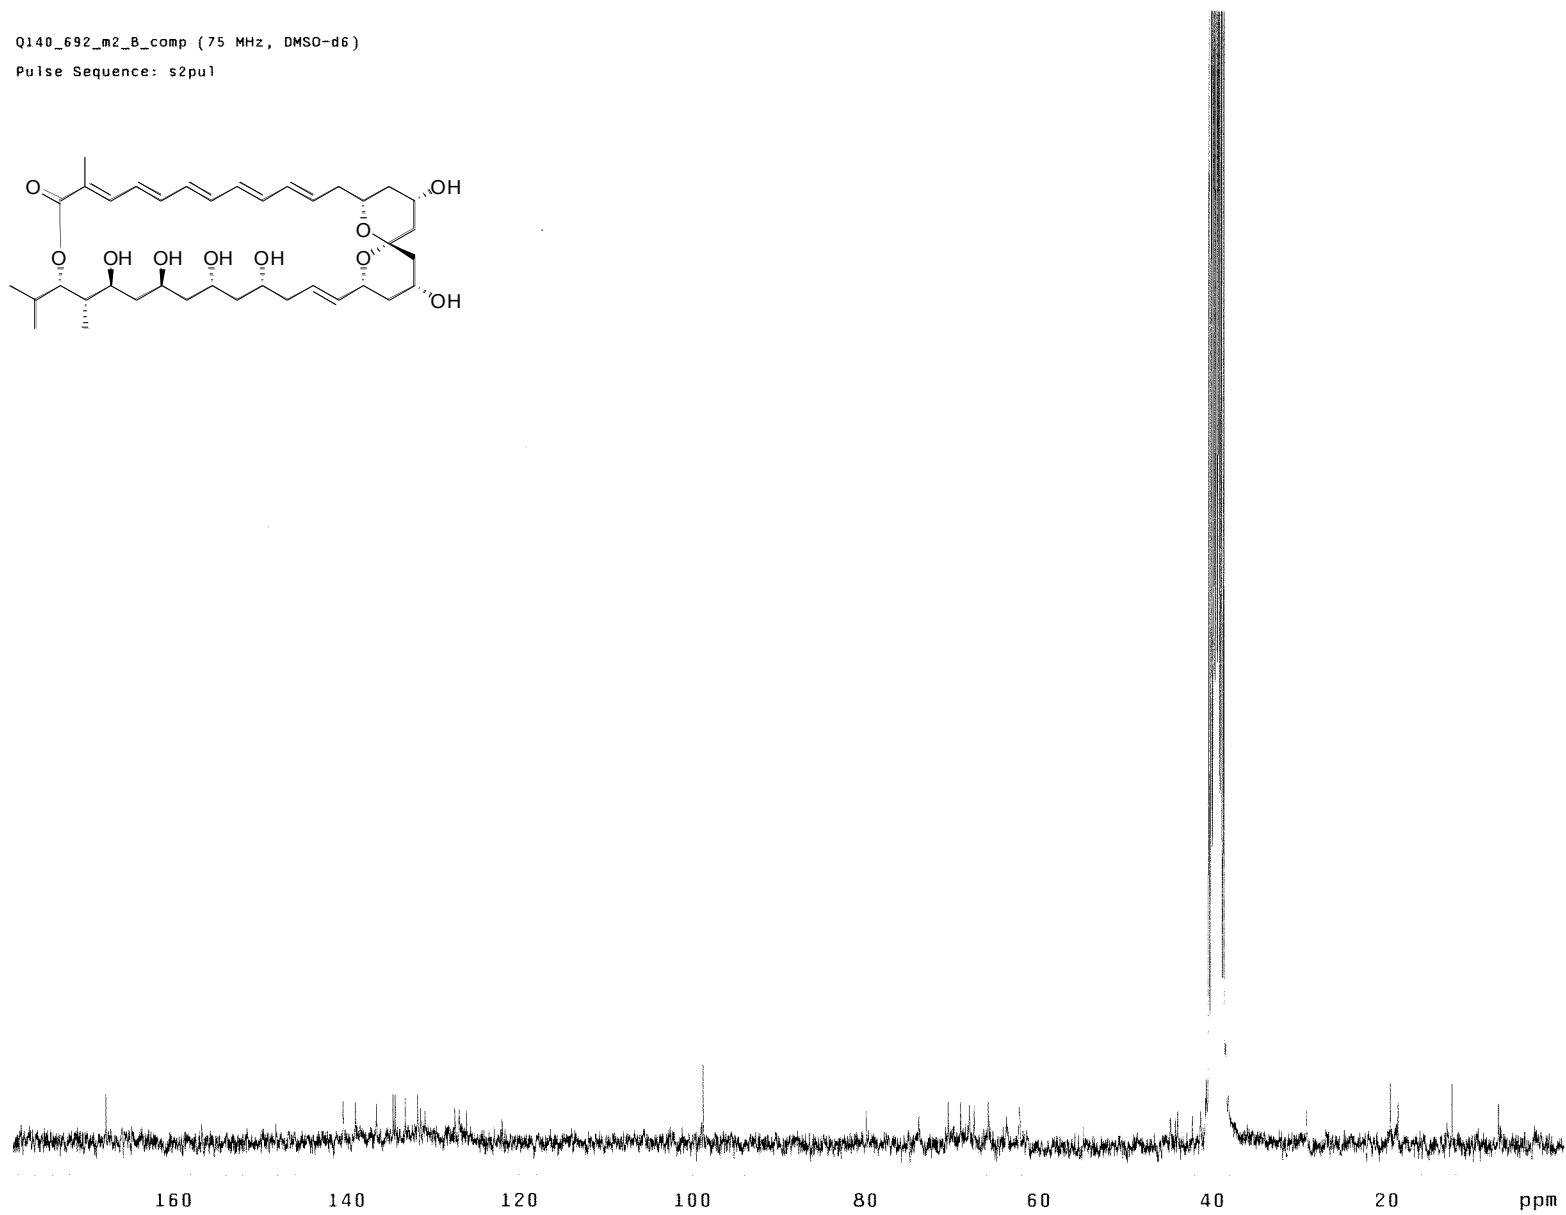

Figure S8. <sup>13</sup>C NMR spectrum of **1** (75 MHz, DMSO-*d*<sub>6</sub>)

Q140-962-m2-B-homo2dj (500 MHz, DMSO-d<sub>6</sub>)  
Pulse Sequence: homo2dj

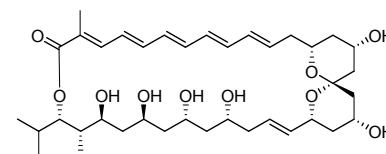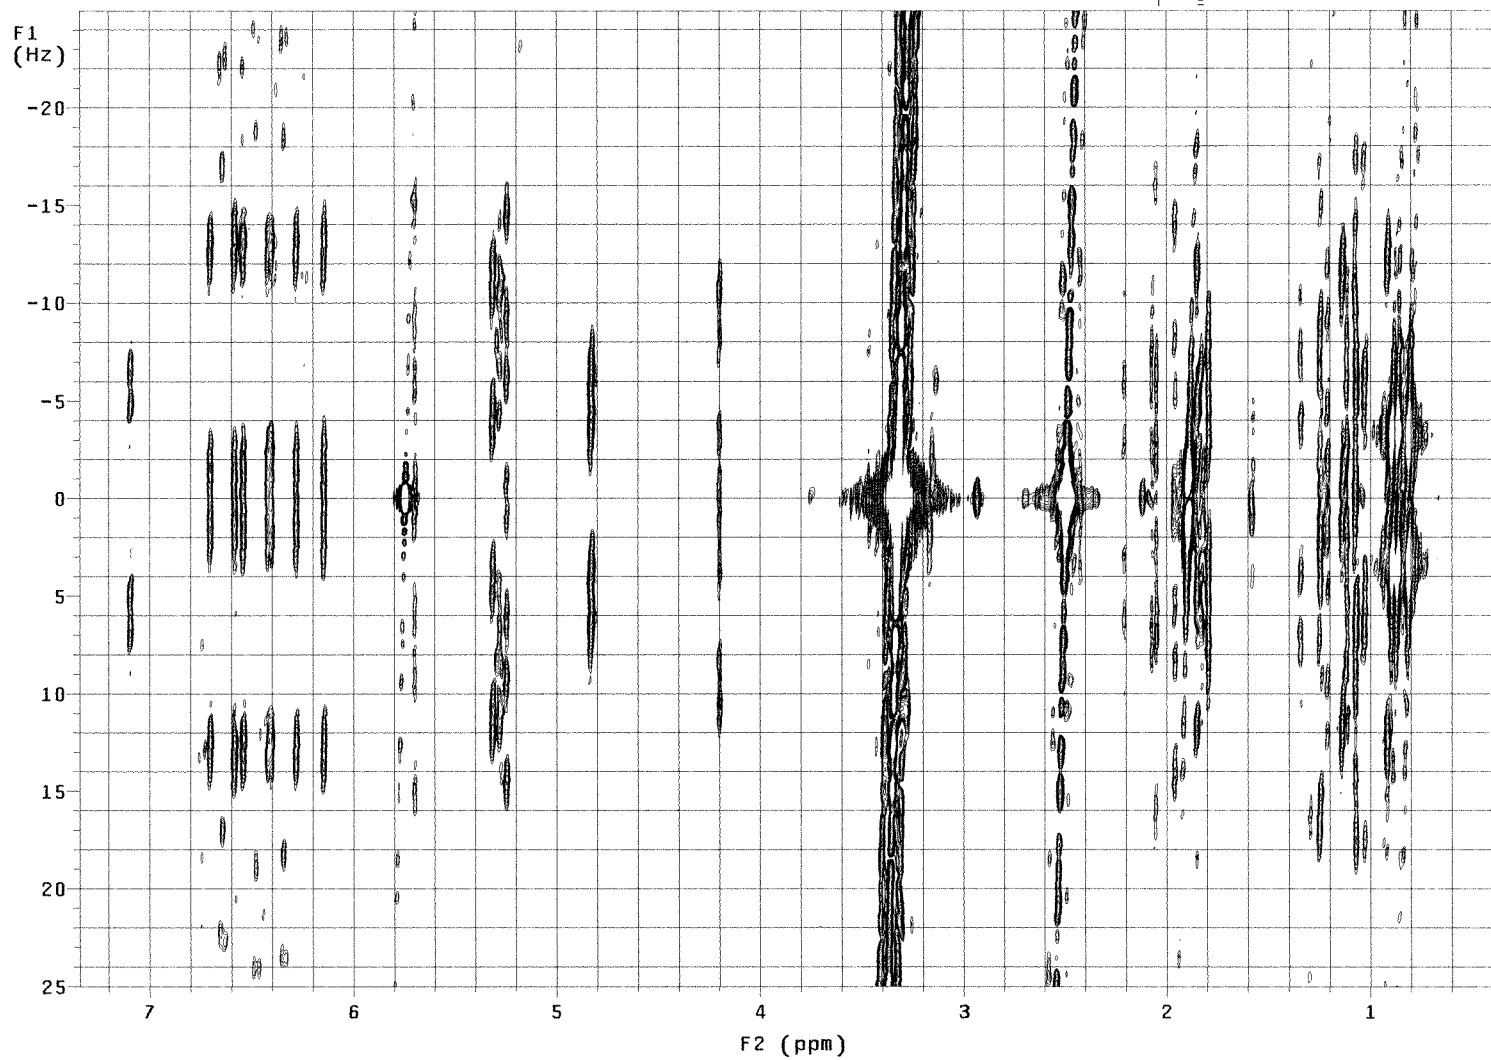

**Figure S9.** Homo 2D *J*-resolved <sup>1</sup>H NMR spectrum of **1** (500 MHz, DMSO-*d*<sub>6</sub>)

Q140-692-m2-B-gCOSY (500 MHz, DMSO-d6)

Archive directory: /export/home/fenical/kwon/vnmrsys/data  
Sample directory: Q140\_692\_m2\_B\_25Jun2005

Pulse Sequence: gCOSY

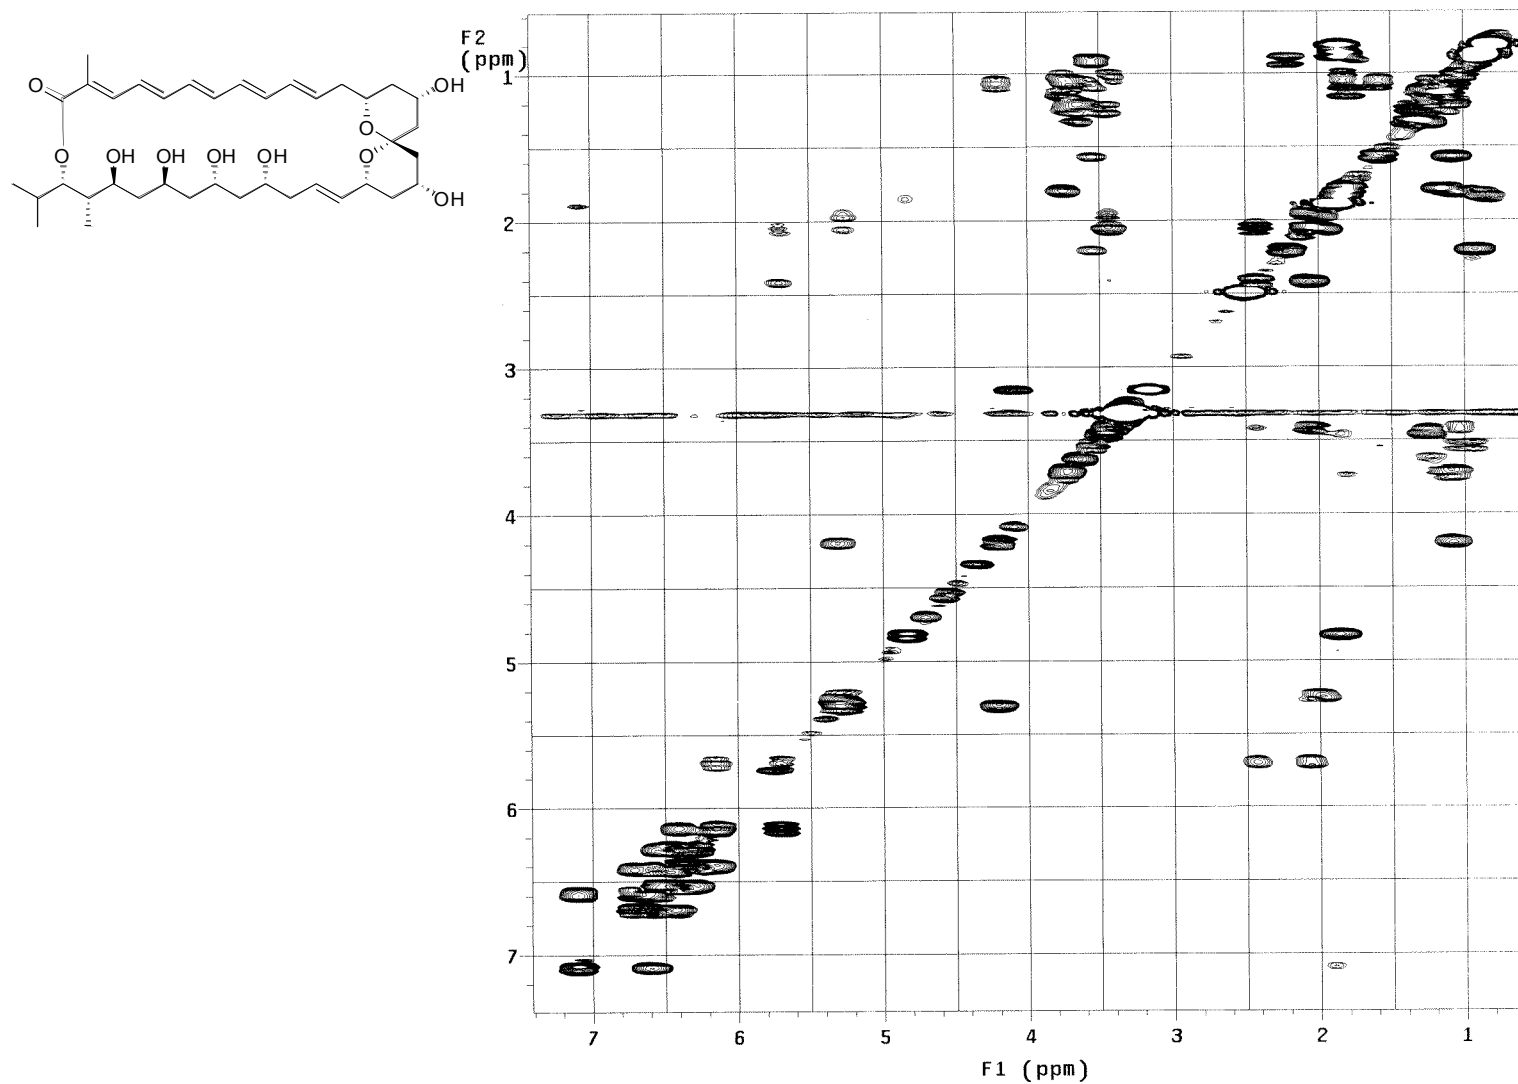

Figure S10. <sup>1</sup>H-<sup>1</sup>H COSY spectrum of **1** (500 MHz, DMSO-*d*<sub>6</sub>)

Q140-692-m2-B-gHMQC (500 MHz, DMSO-d6)

Archive directory: /export/home/fenical/kwon/vnmrsys/data  
Sample directory: Q140\_692\_m2\_B\_1H\_HMQC\_25Jun2005  
File: gHMQC

Pulse Sequence: gHMQC

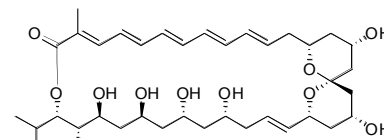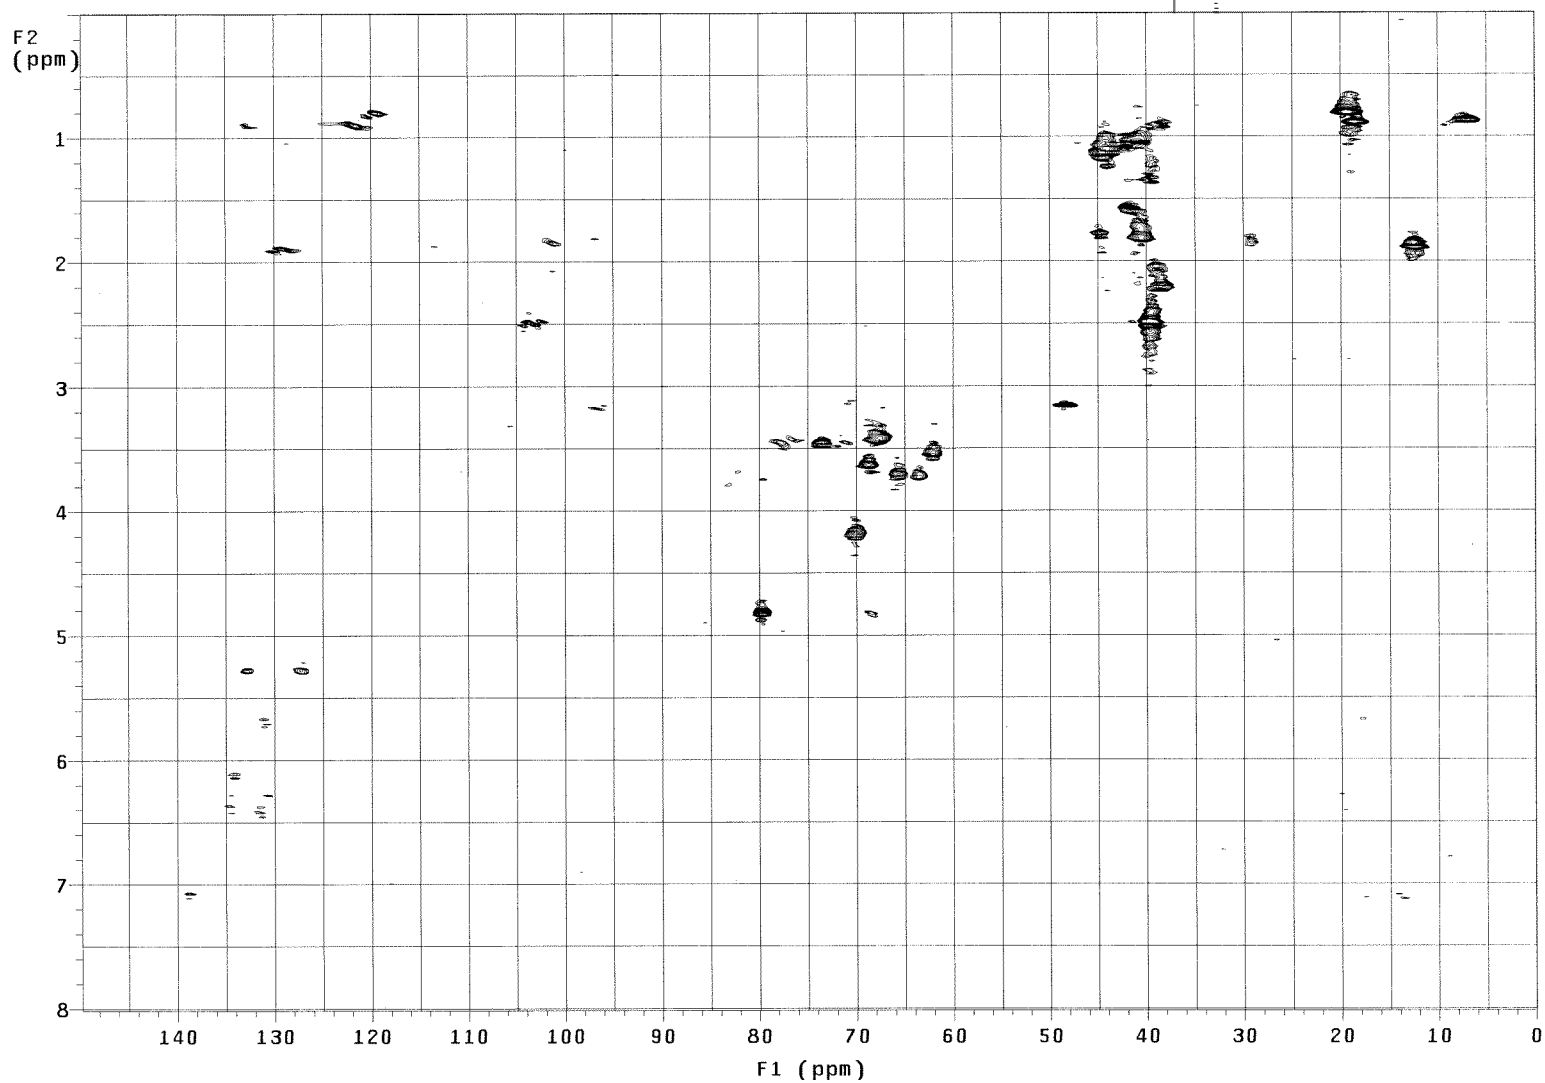

Figure S11. gHMQC spectrum of **1** (500 MHz, DMSO- $d_6$ )





Q140-692-m2-B-ROESY (500 MHz, DMSO-d<sub>6</sub>)

Archive directory: /export/home/fenical/kwon/vnmrsys/data  
 Sample directory: Q140\_692\_m2\_B\_1H\_ROESY\_25Jun2005

Pulse Sequence: ROESY

Solvent: DMSO  
 Temp. 25.0 C / 298.1 K  
 File: Q140\_692\_m2\_B\_ROESY\_500\_DMSO  
 INOVA-500 "nightmare500"

Relax. delay 2.000 sec  
 Mixing 0.200 sec  
 Acq. time 0.171 sec  
 Width 5995.2 Hz  
 2D Width 5995.2 Hz  
 16 repetitions  
 2 x 256 increments  
 OBSERVE H1, 499.5905057 MHz  
 DATA PROCESSING  
 Gauss apodization 0.079 sec  
 F1 DATA PROCESSING  
 Gauss apodization 0.023 sec  
 FT size 2048 x 2048  
 Total time 5 hr, 31 min, 11 sec

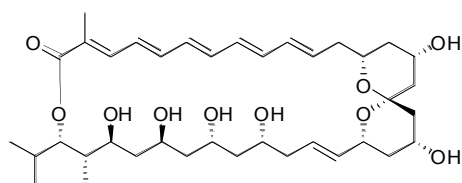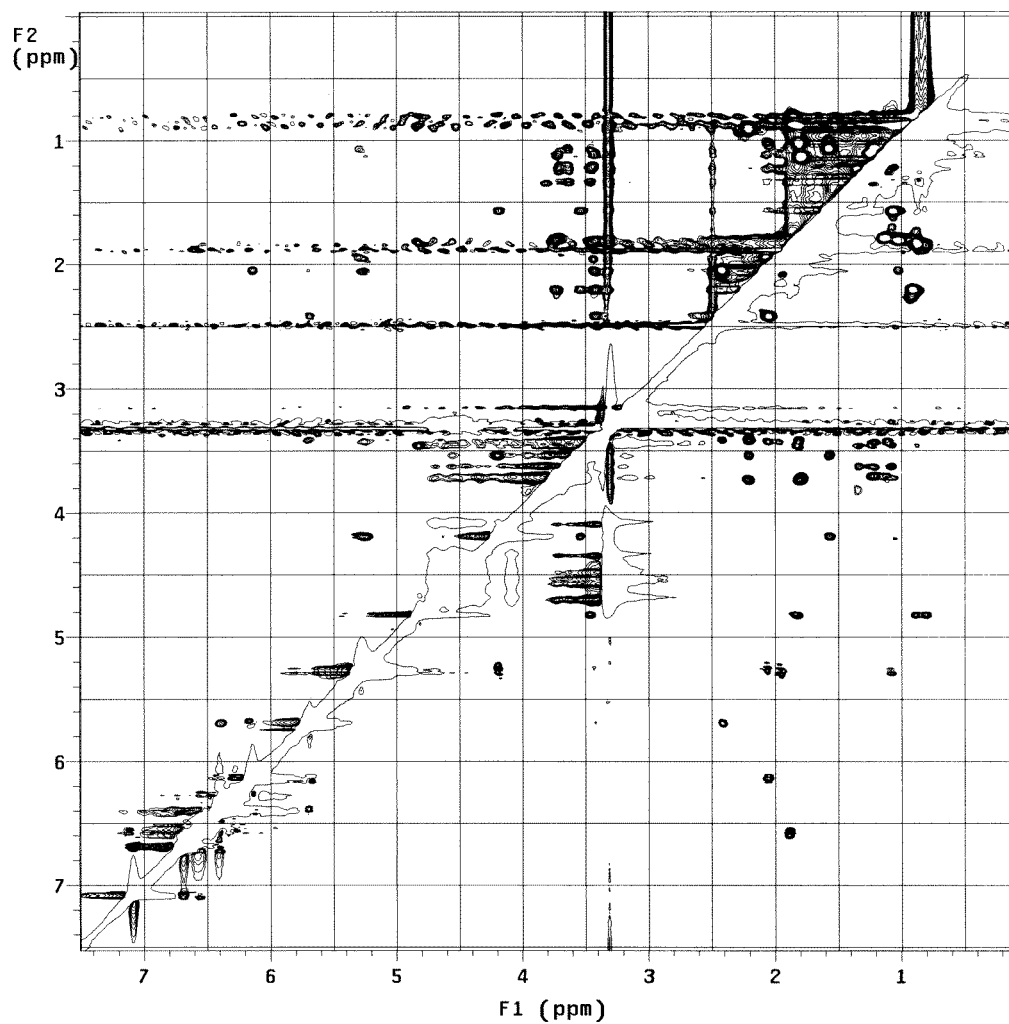

Figure S13. ROESY spectrum of 1 (500 MHz, DMSO-*d*<sub>6</sub>)

DAD1, 13.597 (42.4 mAU, - ) Ref=12.651 & 14.251 of 692DOW2.D

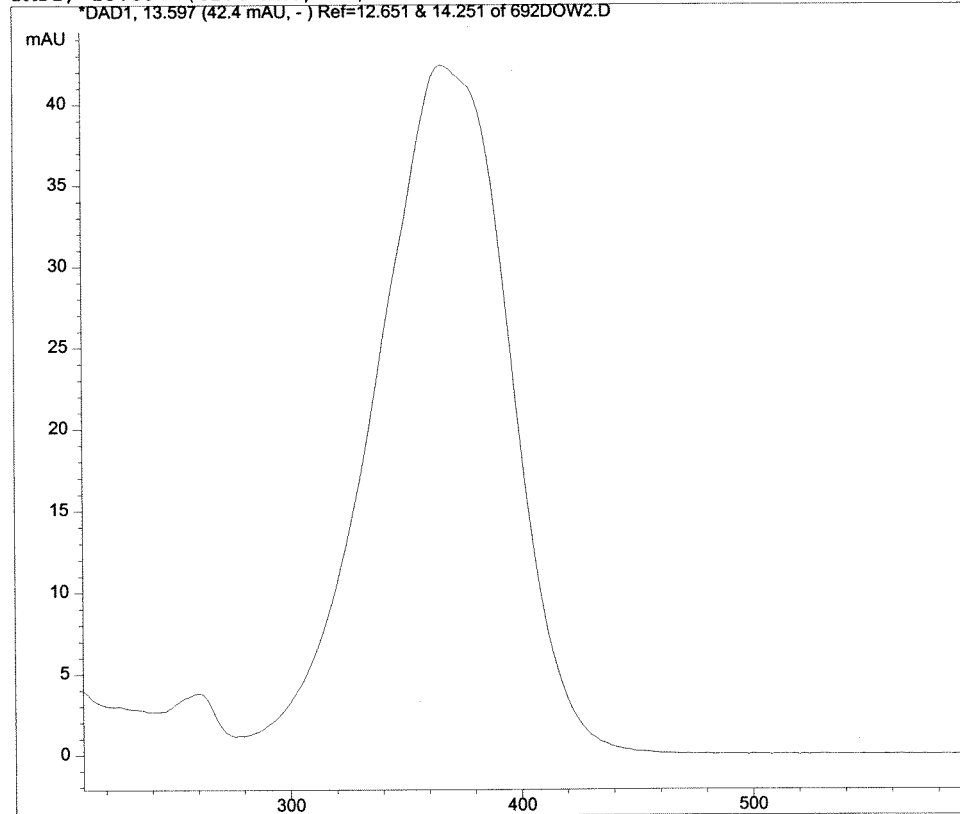

MS Spectrum

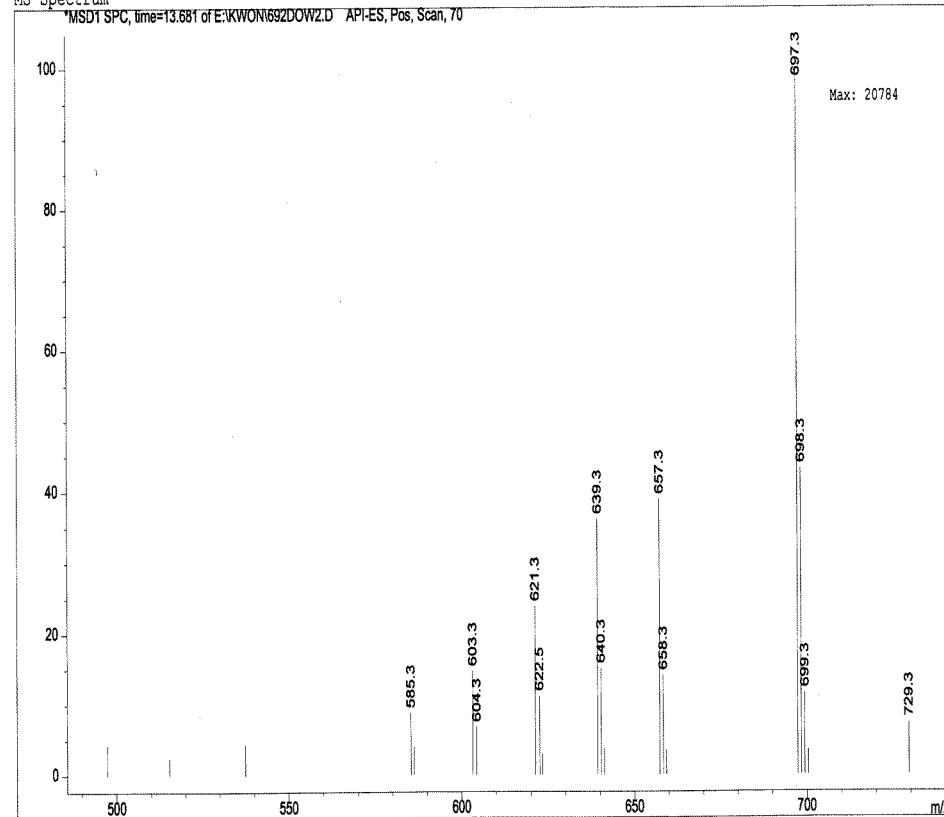

**Figure S14.** UV and ESI-MS spectra derived from HPLC-DAD-MSD (MeCN-H<sub>2</sub>O) of compound 1.

Q140\_692A\_Dowex\_m2b (500 MHz, DMSO-d6)

Archive directory: /export/home/fenical/kwon/vnmrsys/data

Sample directory:

File: PROTON

Pulse Sequence: s2pu1

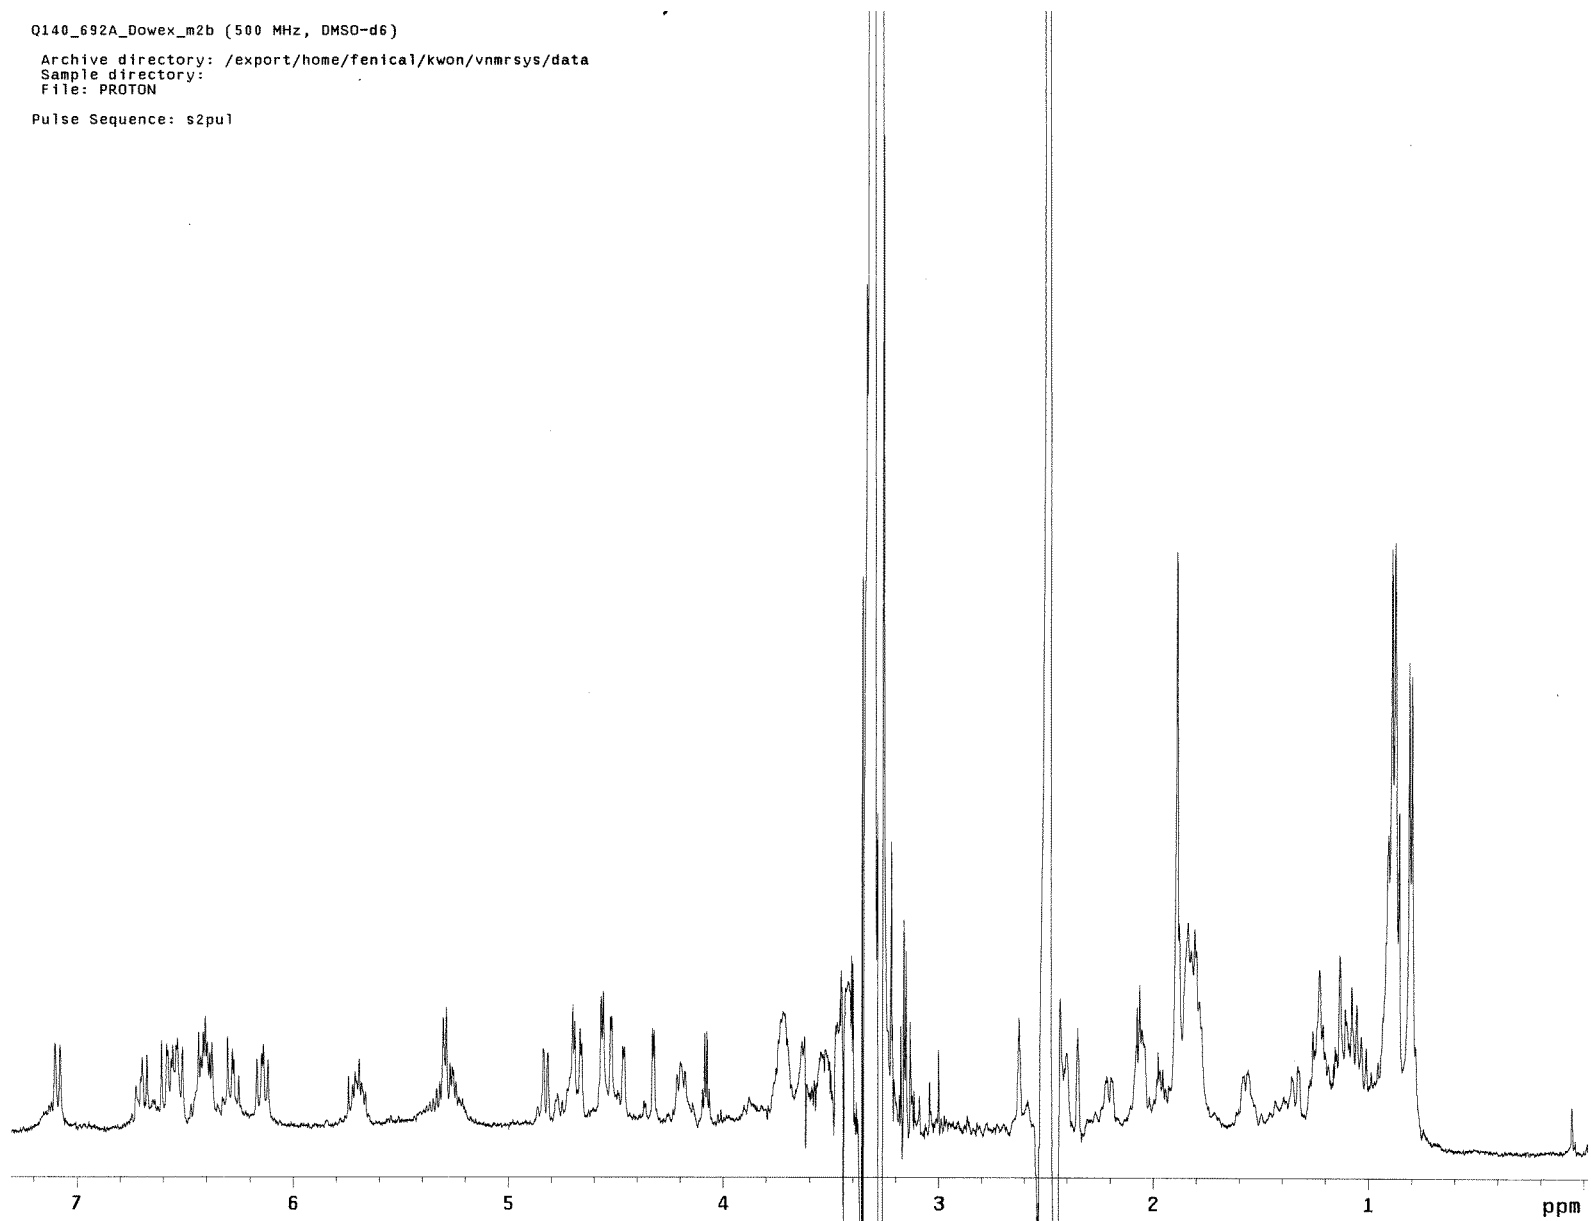

**Figure S15.** <sup>1</sup>H NMR spectrum of compound 1 (500 MHz, DMSO-*d*<sub>6</sub>)

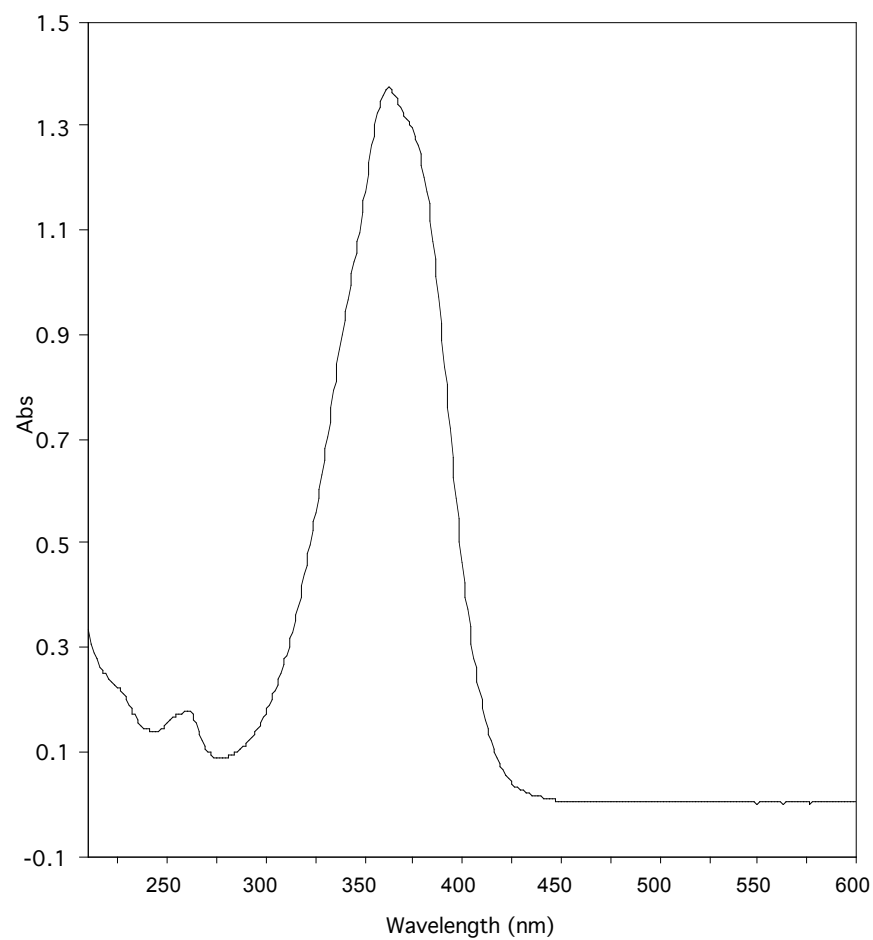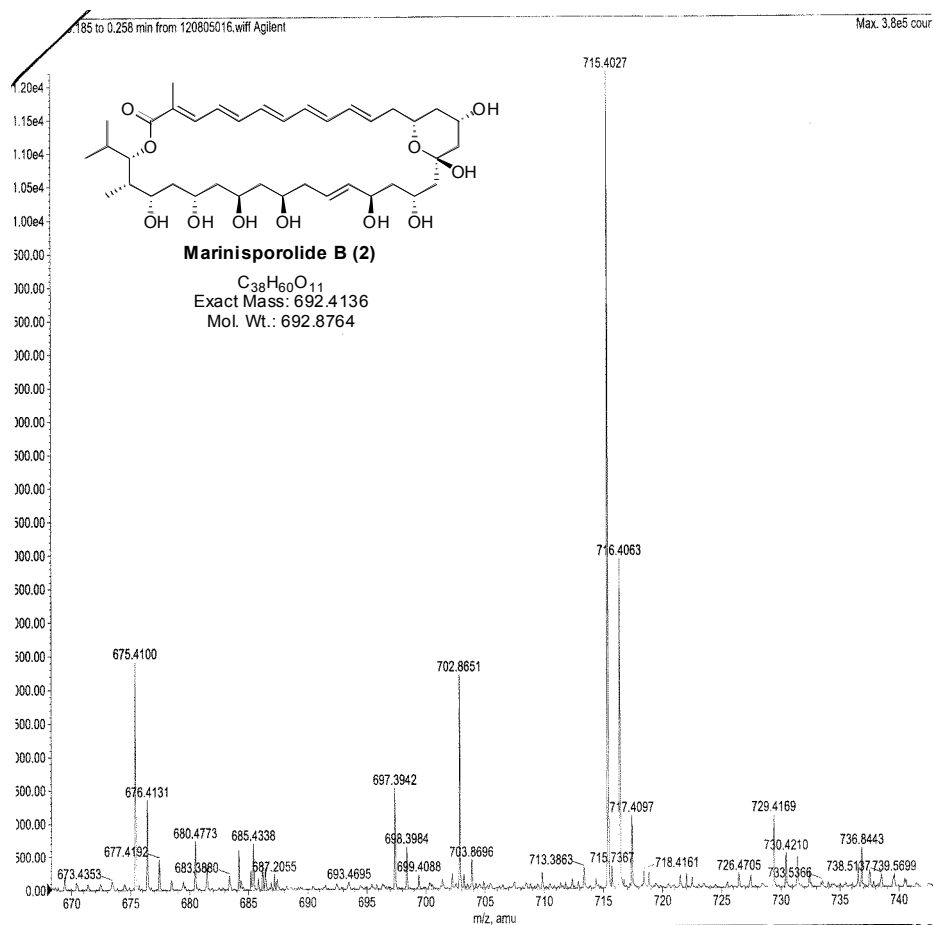

**Figure S16.** UV (MeOH) and HR-ESI-TOF MS spectra of marinisporolide B (2)

Q140\_692\_m1\_8\_comp (500 MHz, DMSO-d6)  
Archive directory: /export/home/fenical/kwon/vnmrsys/data  
Sample directory:  
File: PROTON  
Pulse Sequence: s2pu1

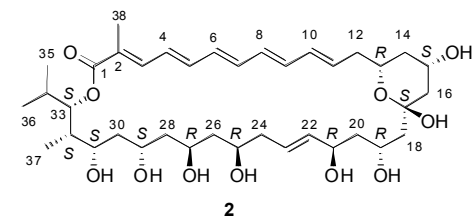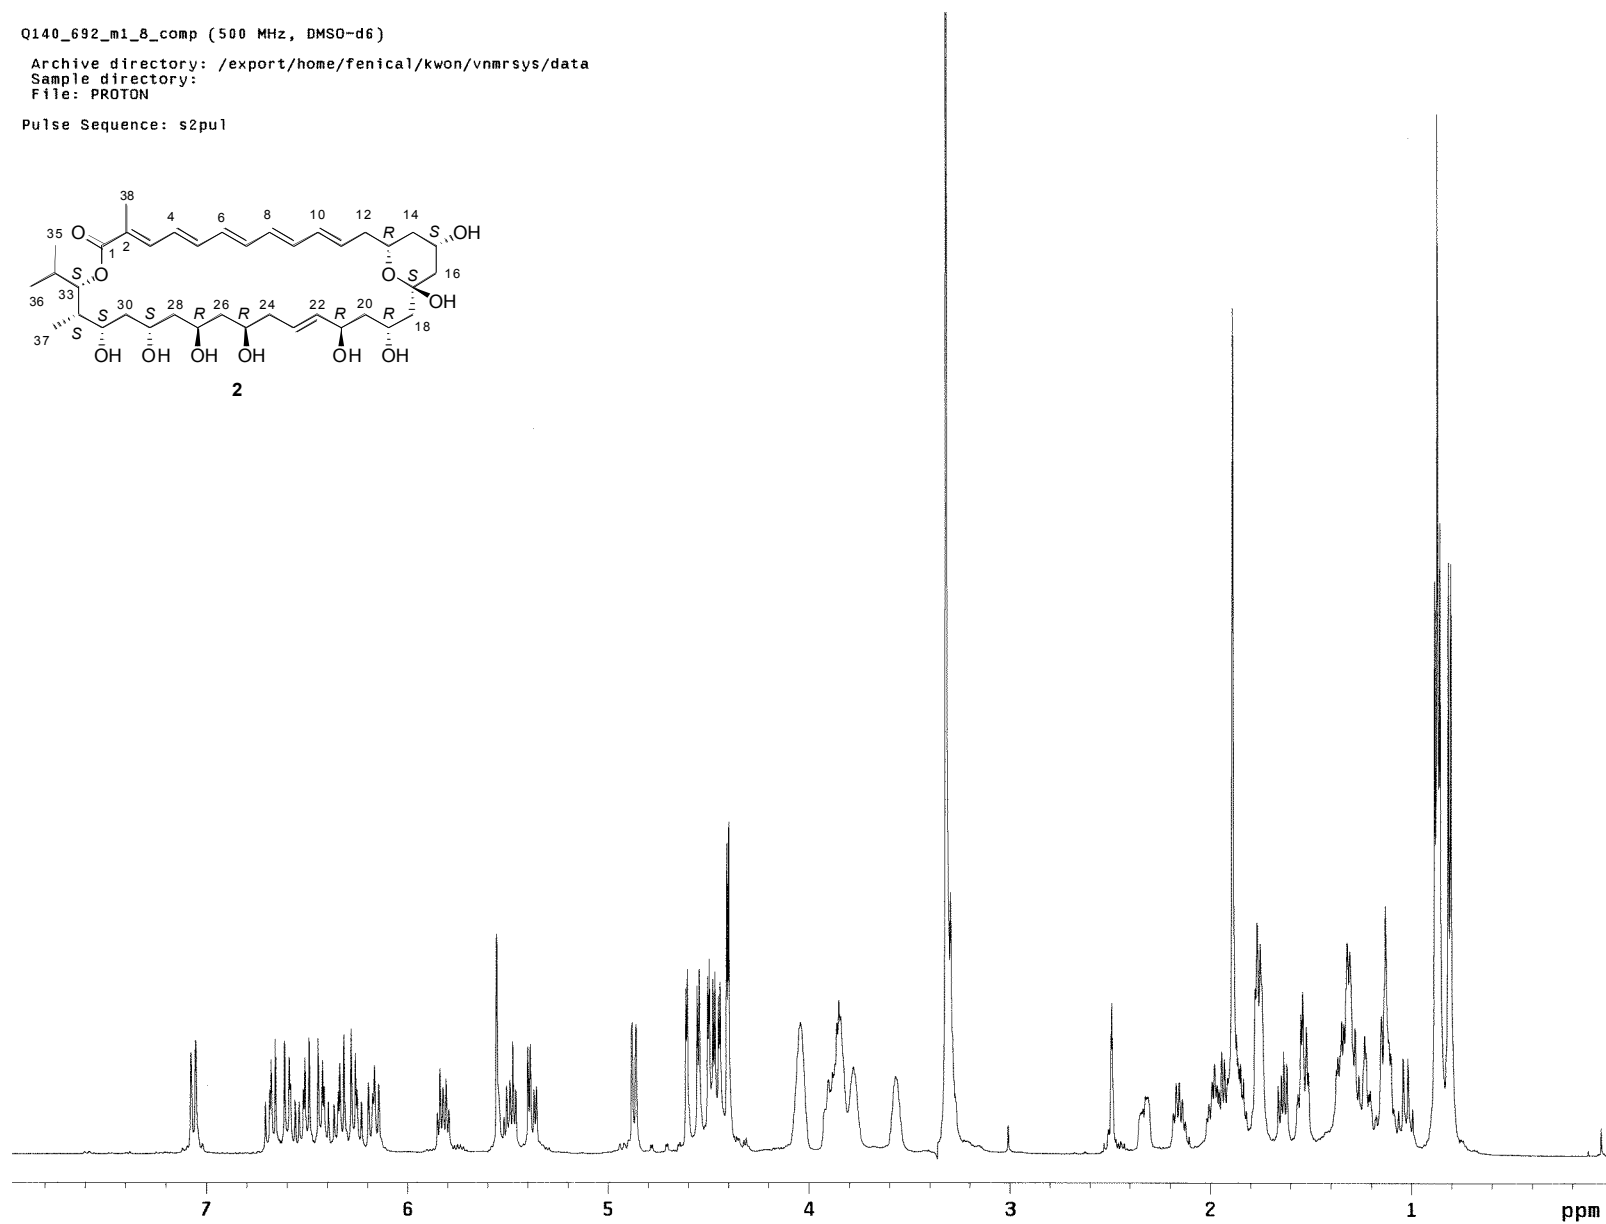

Figure S17.  $^1\text{H}$  NMR spectrum of marinisporolide B (**2**) (500 MHz, DMSO- $d_6$ )

Q140\_692\_m1\_8\_comp (75 MHz, DMSO-d<sub>6</sub>)

Pulse Sequence: s2pu1

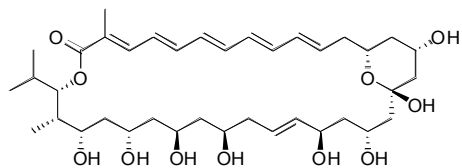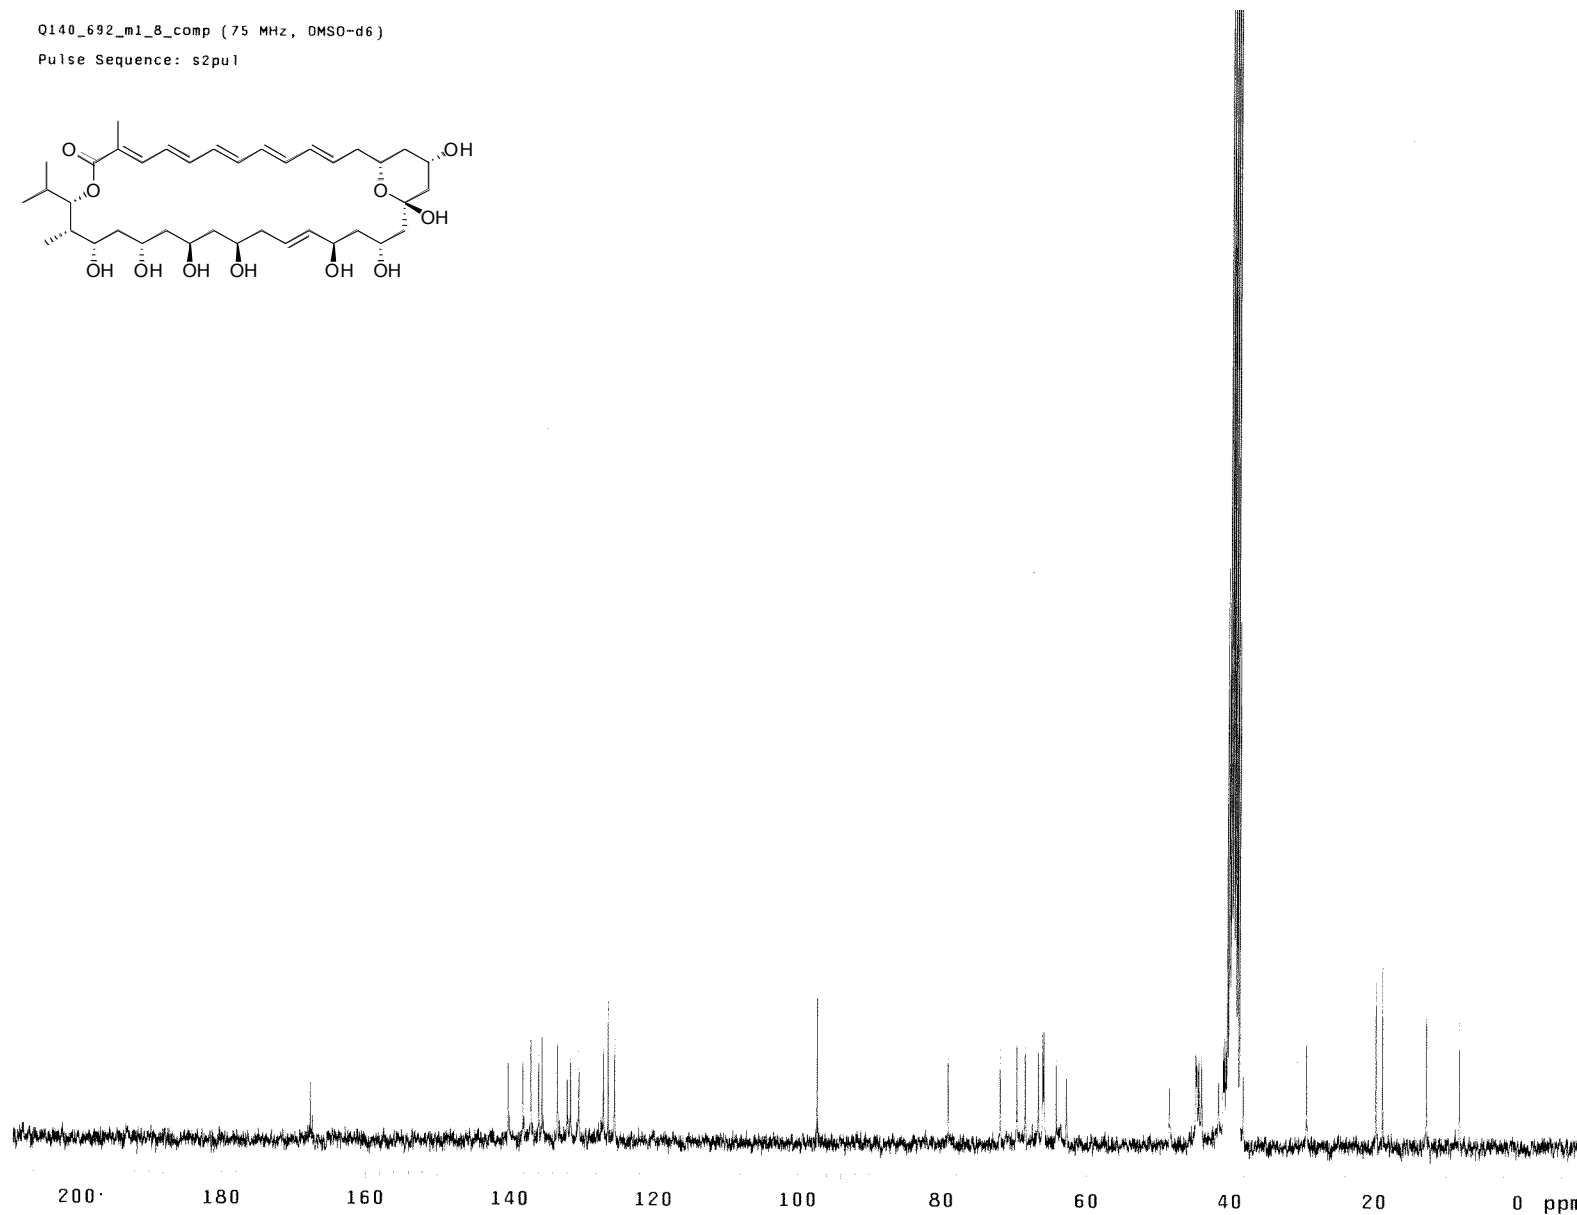

Figure S18. <sup>13</sup>C NMR spectrum of **2** (75 MHz, DMSO-*d*<sub>6</sub>).

Q140-692-m1-8 (500 MHz, DMSO-d6)

Archive directory: /export/home/fenical/kwon/vnmrsys/data  
Sample directory: Q140\_692\_m1\_8\_comp\_500\_DMSO\_07Jul2005

Pulse Sequence: gCOSY

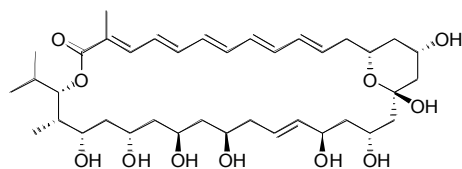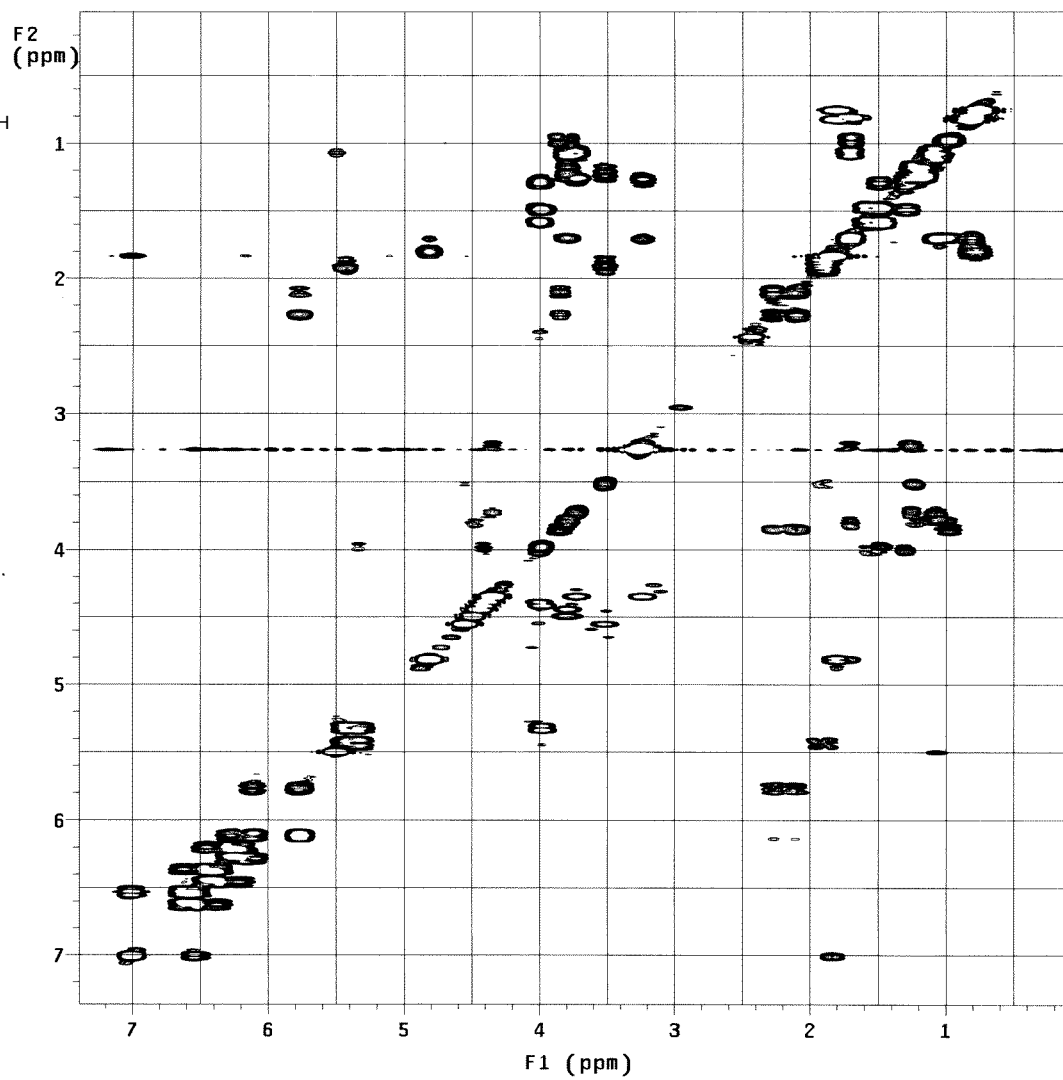

Figure S19.  $^1\text{H}$ - $^1\text{H}$  COSY spectrum of **2** (500 MHz, DMSO- $d_6$ )



Q140-692-m1-8 (500 MHz, DMSO-d<sub>6</sub>)

Archive directory: /export/home/fenical/kwon/vnmrsys/data

Sample directory: Q140\_692\_m1\_8\_comp\_500\_DMSO\_07Jul2005

Pulse Sequence: gHMQC

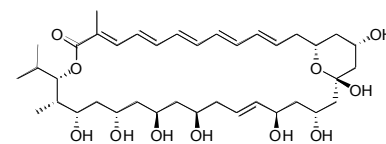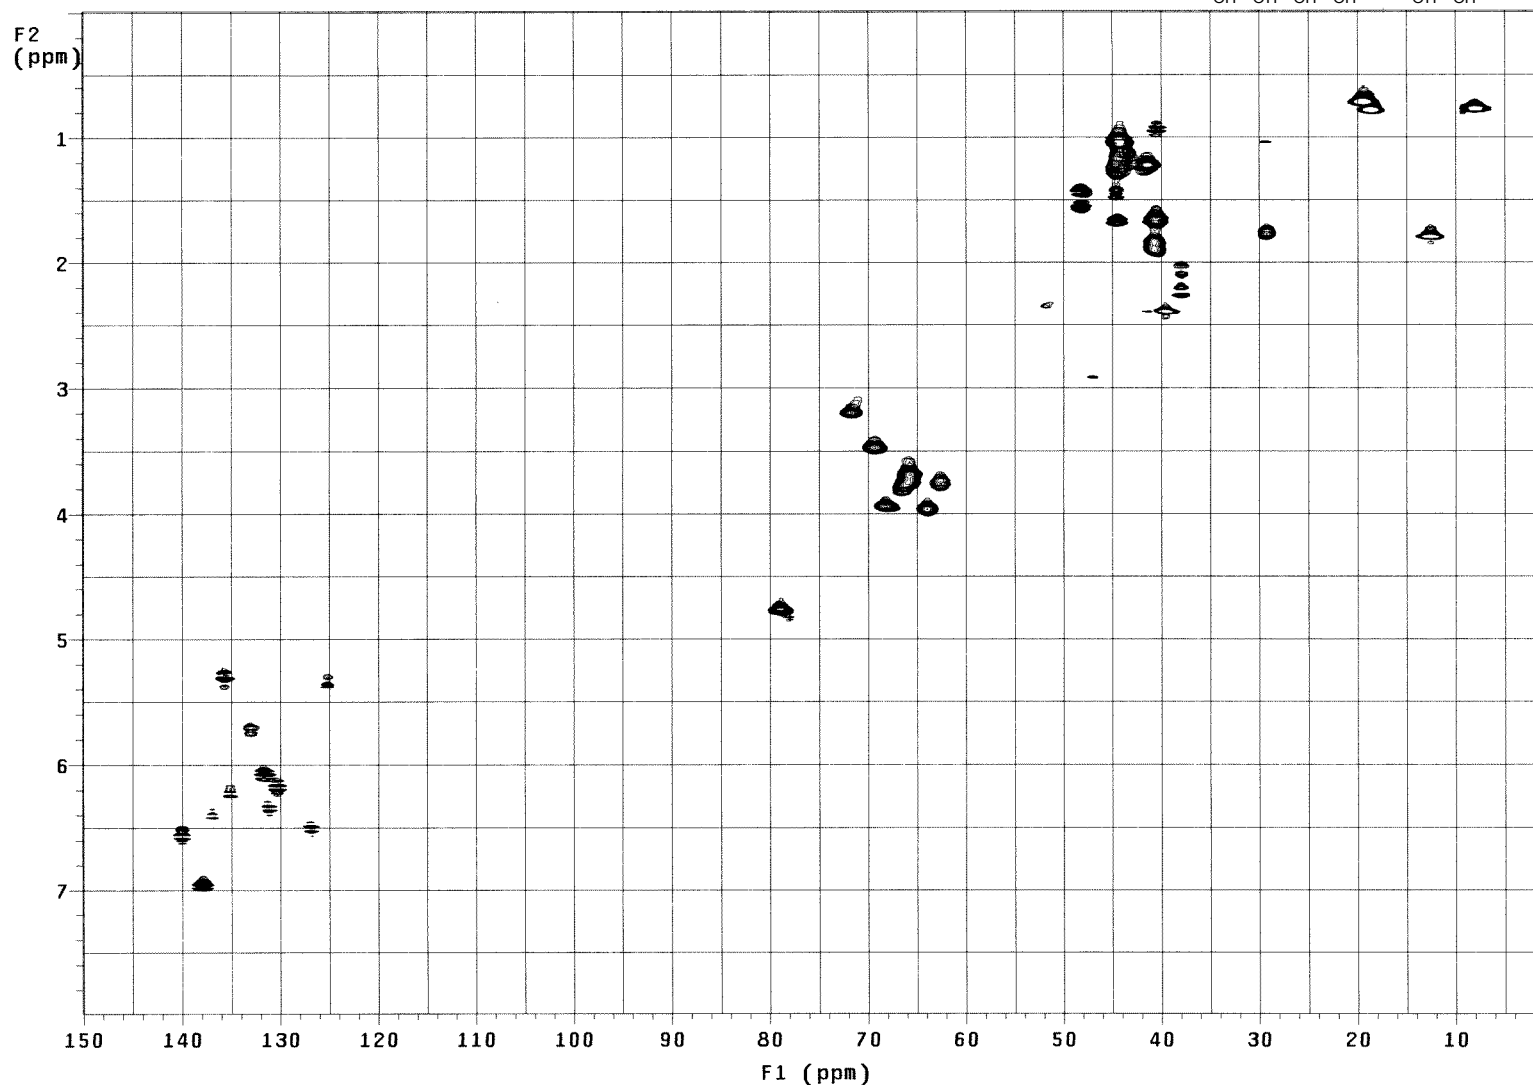

Figure S20. gHMQC spectrum of **2** (500 MHz, DMSO-*d*<sub>6</sub>)



Q140-692-m1-8 (500 MHz, DMSO-d<sub>6</sub>)

Archive directory: /export/home/fenical/kwon/vnmrsys/data  
Sample directory: Q140\_692\_m1\_8\_comp\_500\_DMSO\_07Jul2005

Pulse Sequence: ROESY

Solvent: DMSO  
Temp. 25.0 C / 298.1 K  
File: Q140\_692\_m1\_8\_ROESY  
INNOVA-500 "nightmare500"

Relax. delay 3.000 sec  
Mixing 0.200 sec  
Acq. time 0.205 sec  
Width 4995.9 Hz  
2D Width 4995.9 Hz  
16 repetitions  
2 x 200 increments  
OBSERVE H1, 499.5905054 MHz  
DATA PROCESSING  
Gauss apodization 0.095 sec  
F1 DATA PROCESSING  
Gauss apodization 0.015 sec  
FT size 2048 x 2048  
Total time 6 hr, 10 min, 33 sec

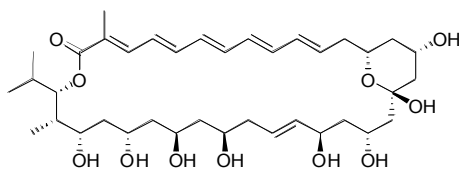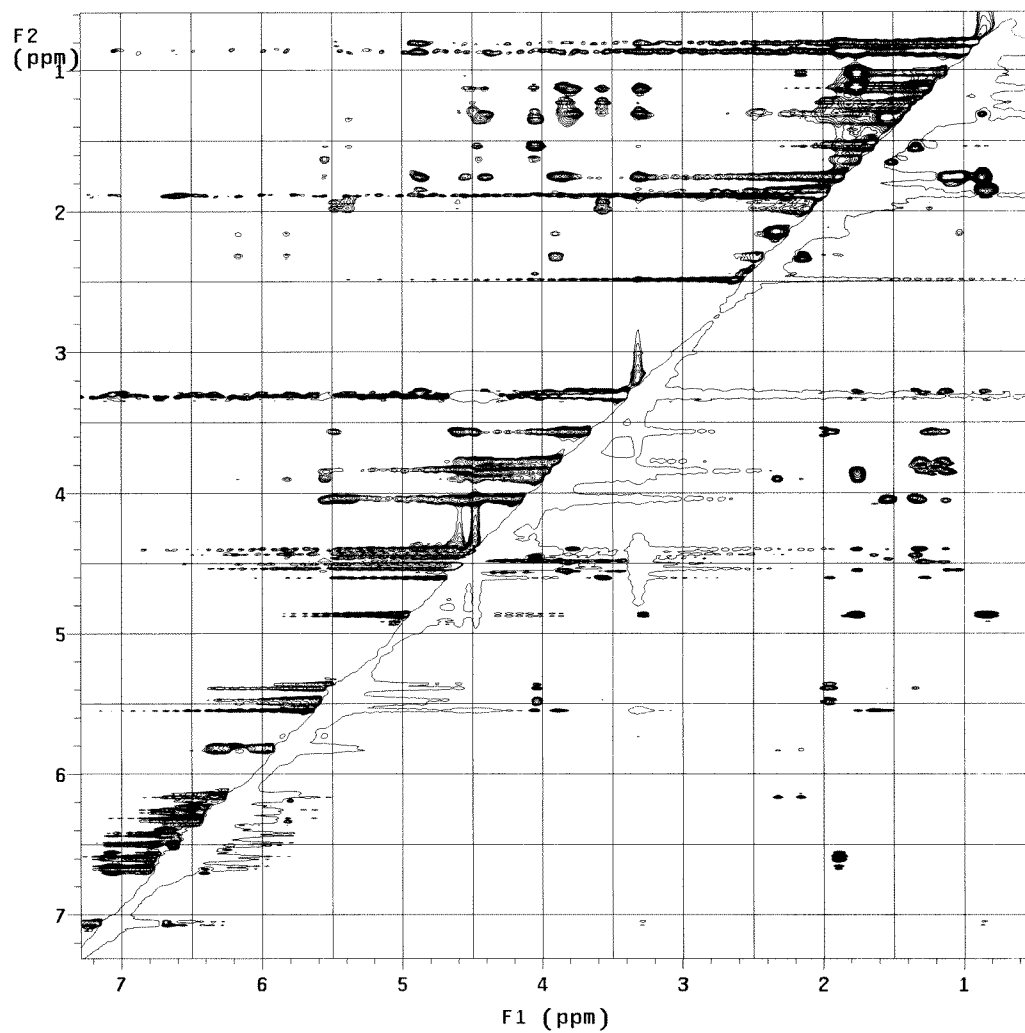

Figure S22. ROESY spectrum of **2** (500 MHz, DMSO-*d*<sub>6</sub>)

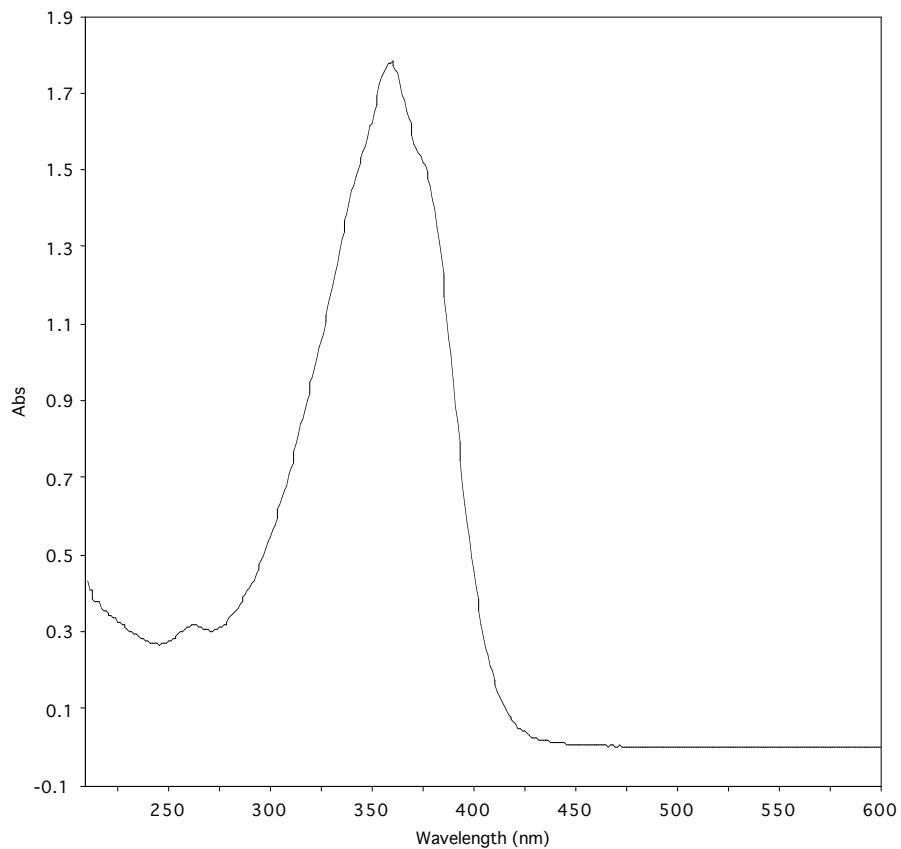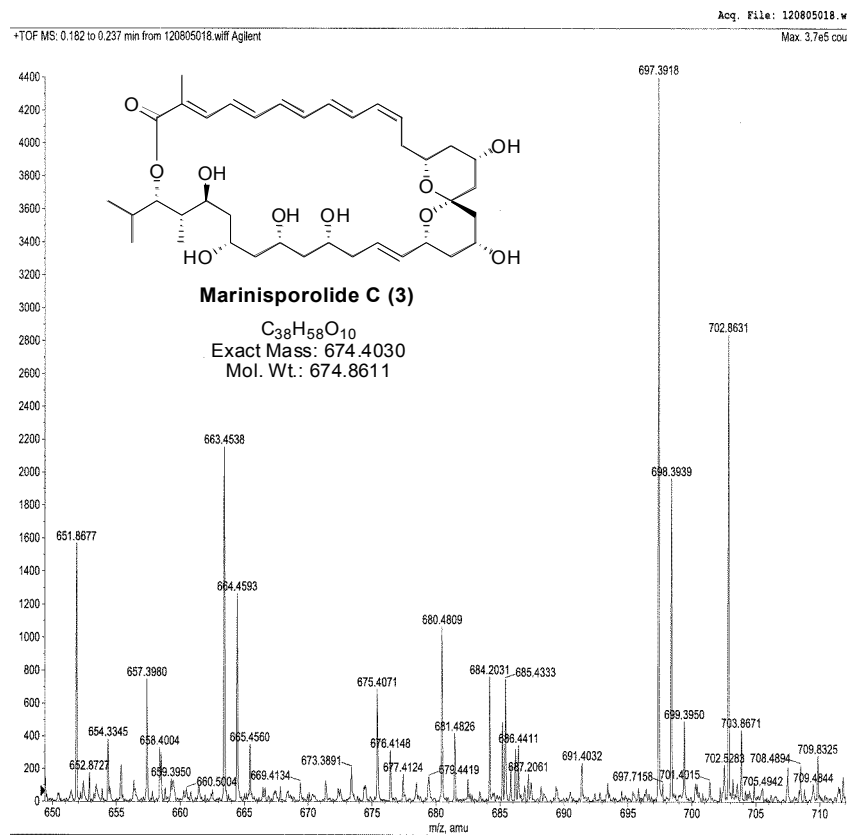

**Figure S23.** UV (MeOH) and HR-ESI-TOF MS spectra of marinisporolide C (3).

Q140\_674\_50\_1\_4m (500 MHz, DMSO-d  
6)

Archive directory: /export/home/fenical/kwon/vnmrsys/data  
Sample directory: Q140\_674\_50\_1\_4m\_DMSO\_27Oct2005

Pulse Sequence: s2pul

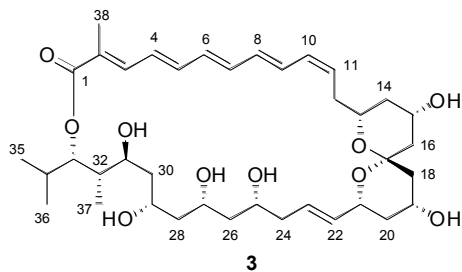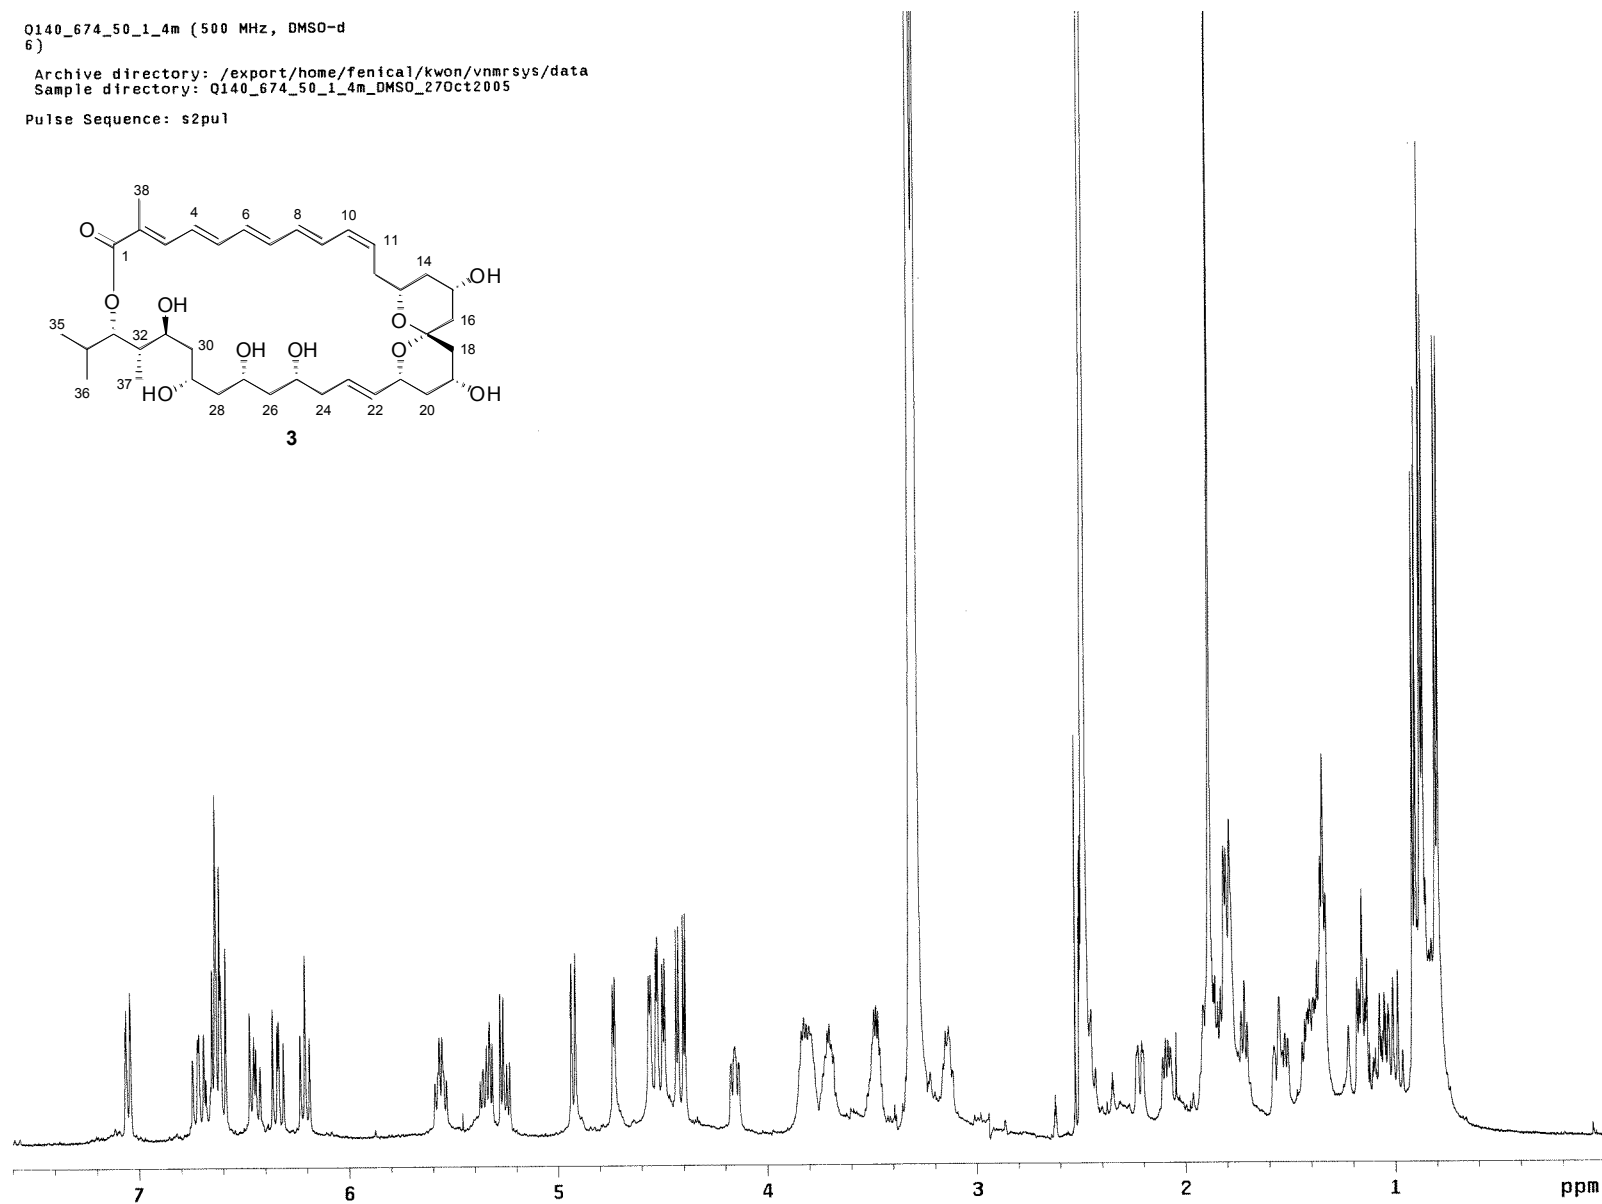

**Figure S24.**  $^1\text{H}$  NMR spectrum of marinisporolide C (**3**) (500 MHz,  $\text{DMSO-}d_6$ ).

Q140\_674\_50\_1\_4m (75 MHz, DMSO-d6)

Pulse Sequence: s2pul

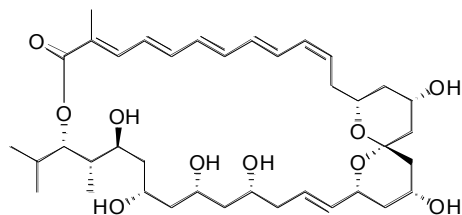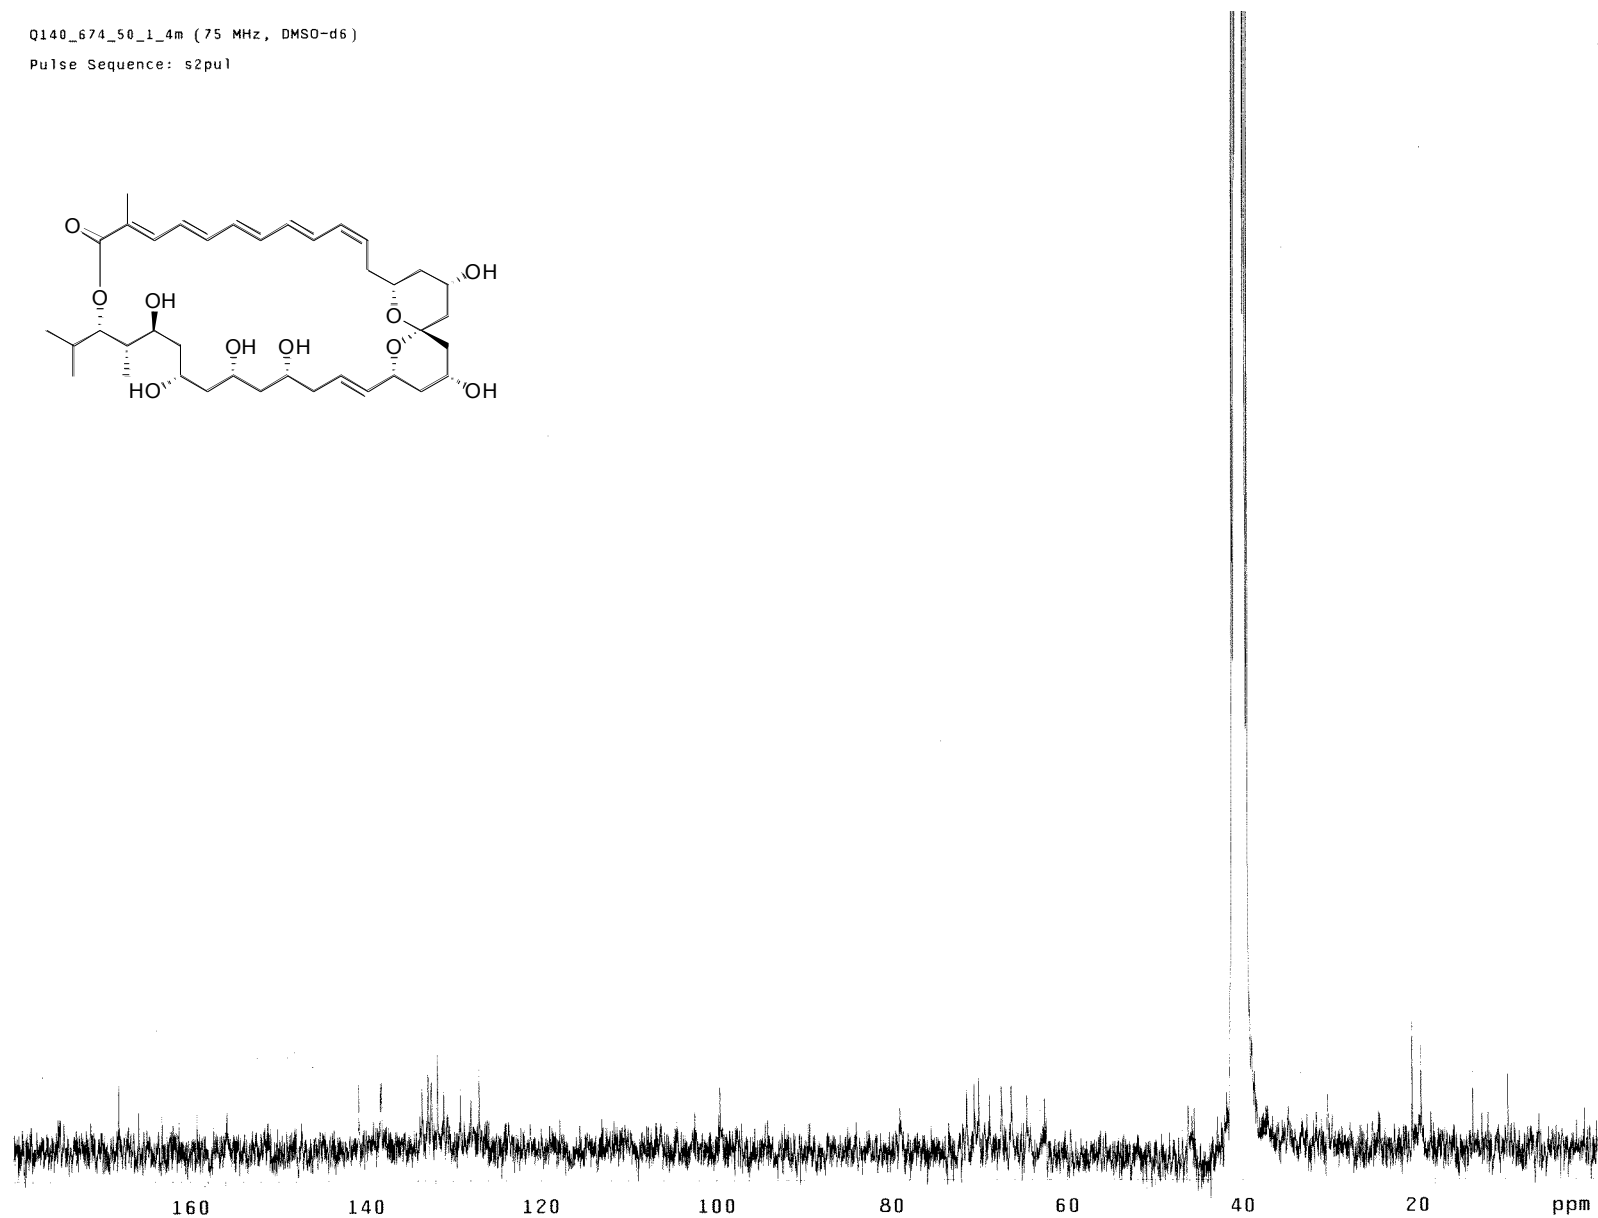

Figure S25.  $^{13}\text{C}$  NMR spectrum of **3** (75 MHz, DMSO- $d_6$ )

CN0140-50%-major-4m (500 MHz, pyridine-d5) marino M-1  
Archive directory: /export/home/fenical/dongchan/vnmrsys/data  
Sample directory: 140\_50\_4m\_500\_pyridine\_27Apr2004  
Pulse Sequence: s2pu1

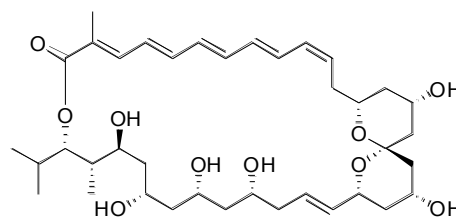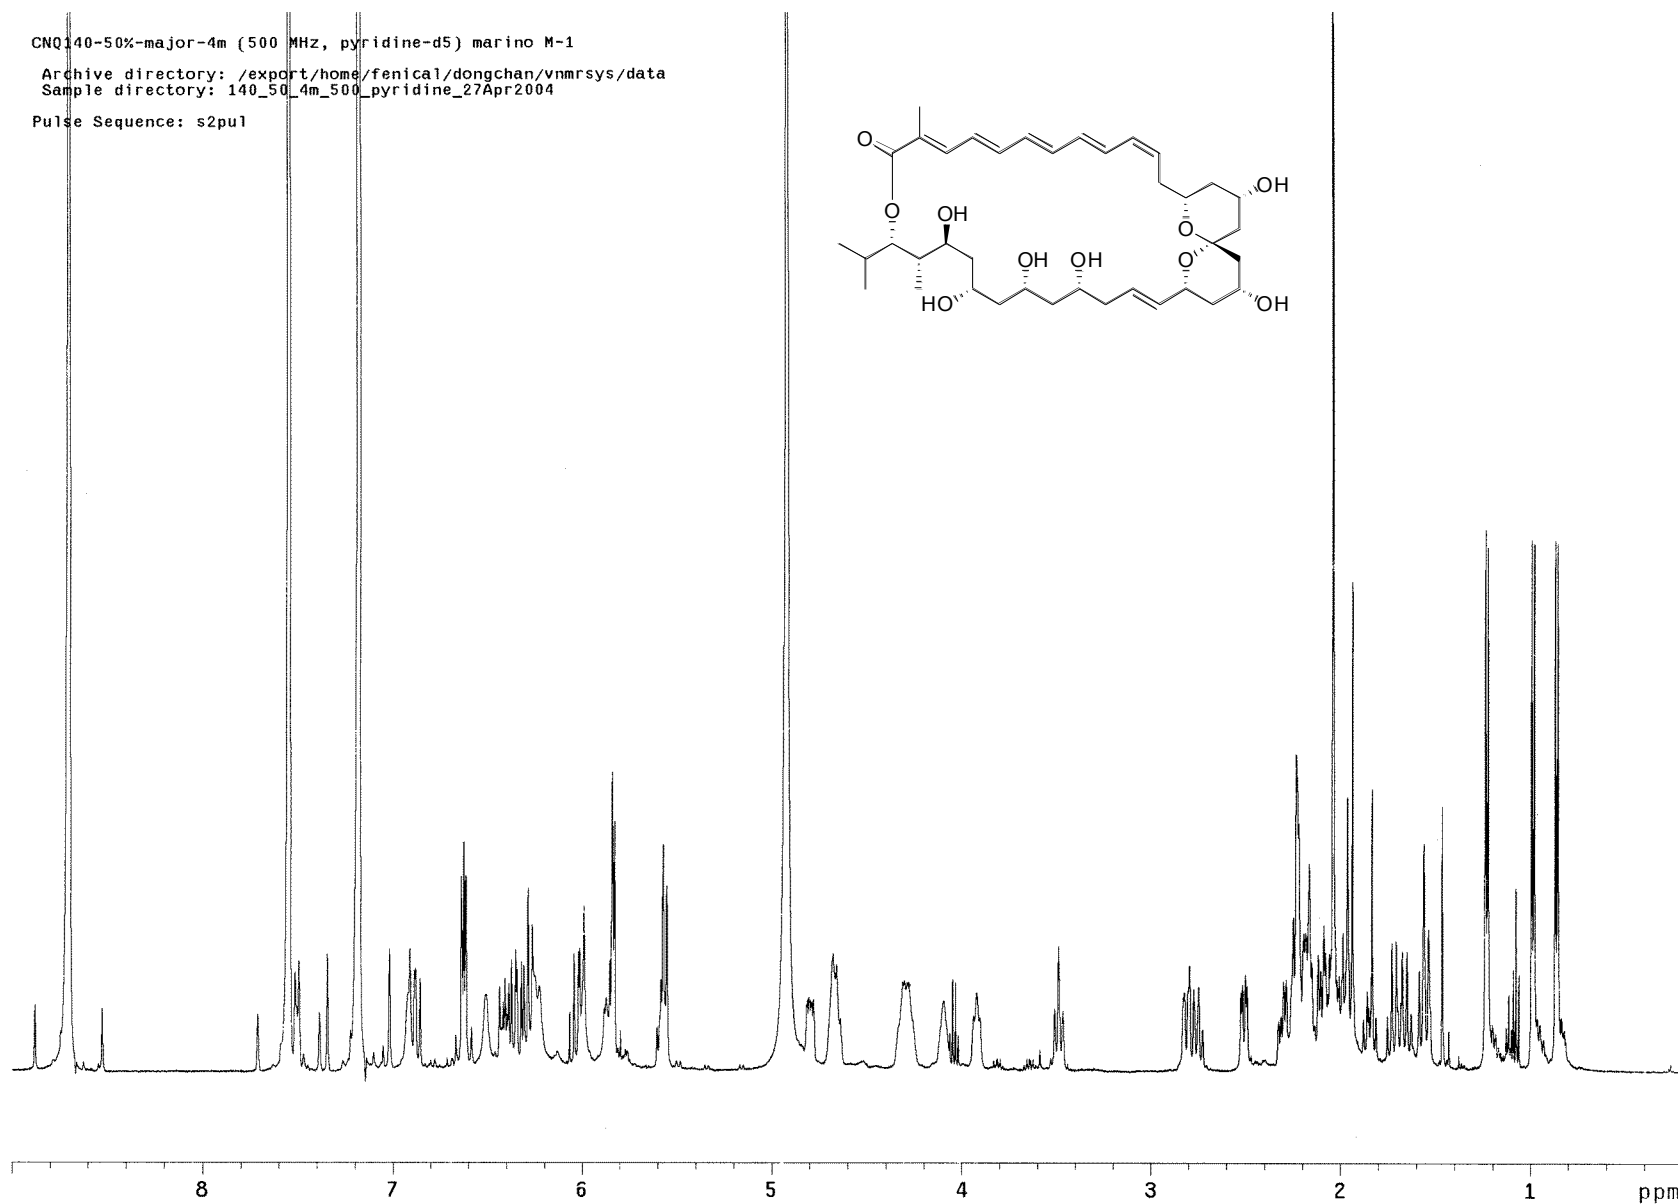

Figure S26. <sup>1</sup>H NMR spectrum of **3** (500 MHz, pyridine-*d*<sub>5</sub>).

140-50%-major-4m-13C (125 MHz, pyridine-d5)  
Archive directory: /export/home/fenice1/dongchan/vnmrsys/data  
Sample directory: 140\_50\_4m\_500\_pyridine\_27Apr2014  
File: CARBON  
Pulse Sequence: s2pu1

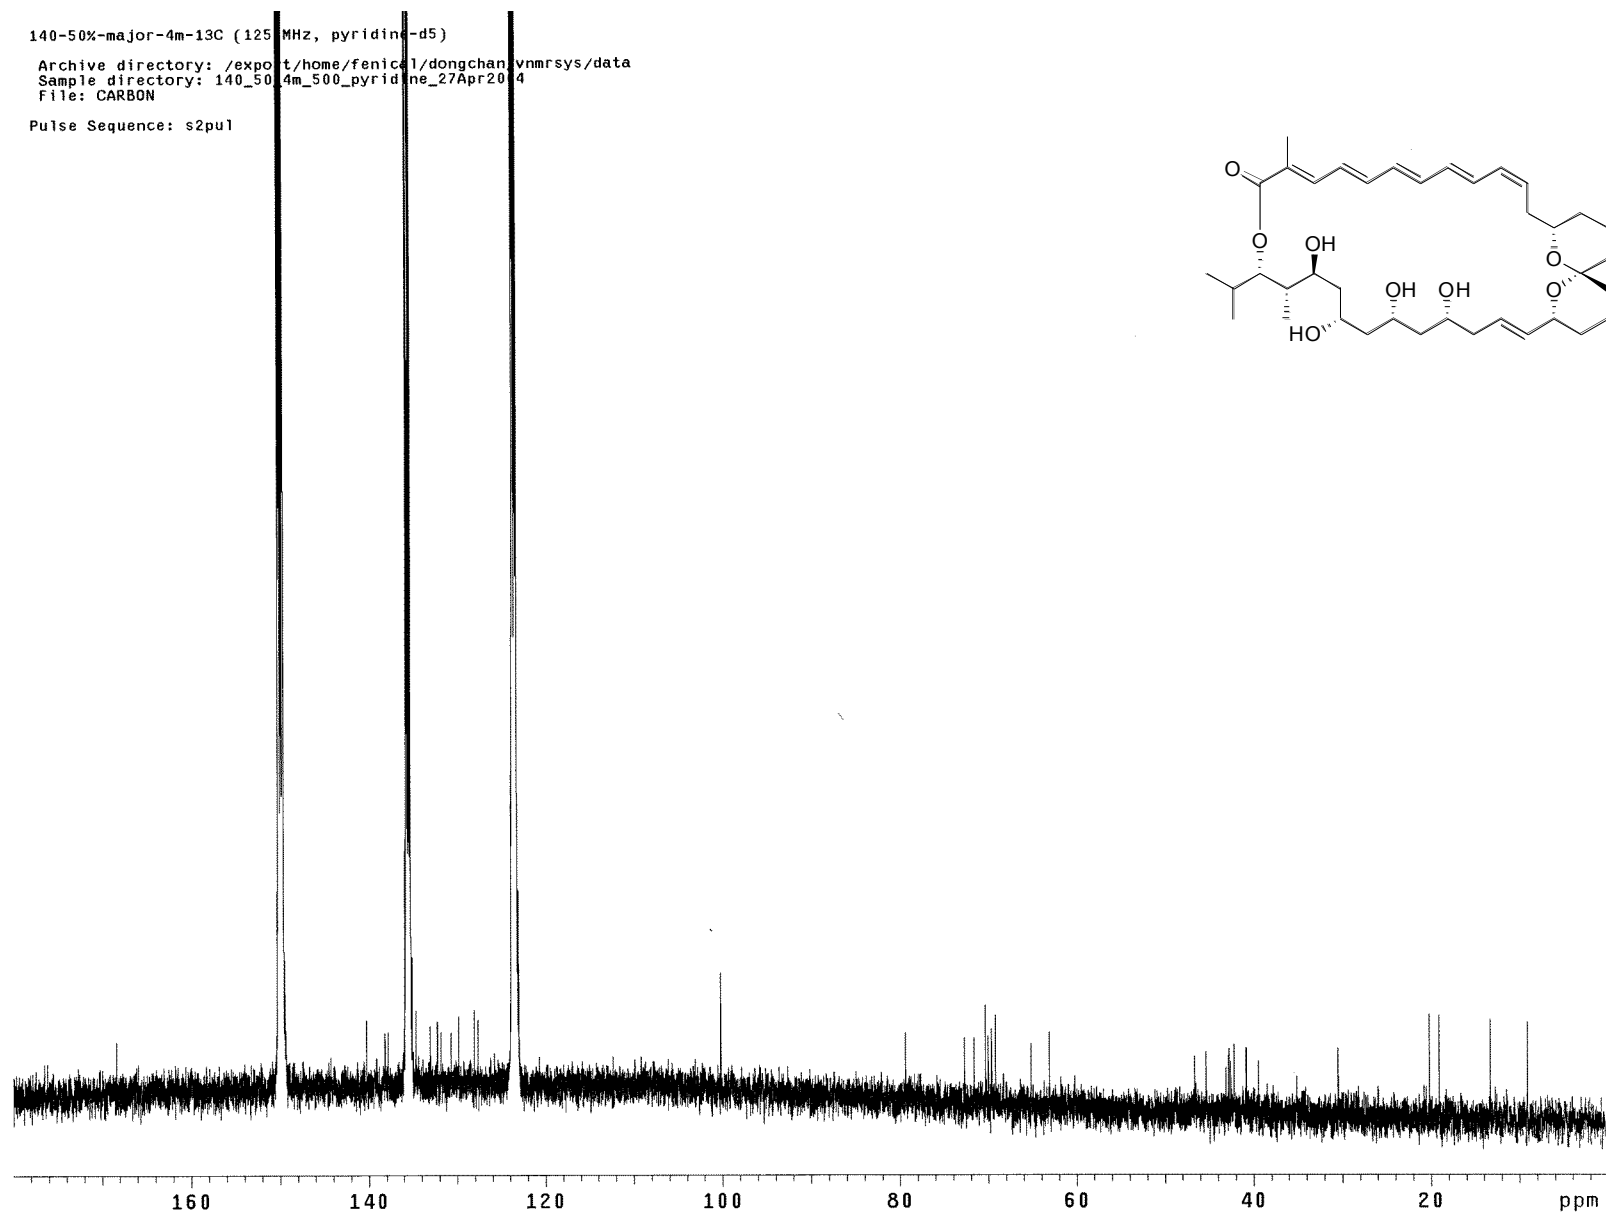

Figure S27. <sup>13</sup>C NMR spectrum of 3 (125 MHz, pyridine-*d*<sub>5</sub>).



Q140-A1-50%-1-4m-hom2dj (500 MHz, pyridine-d<sub>5</sub>)  
Pulse Sequence: hom2dj

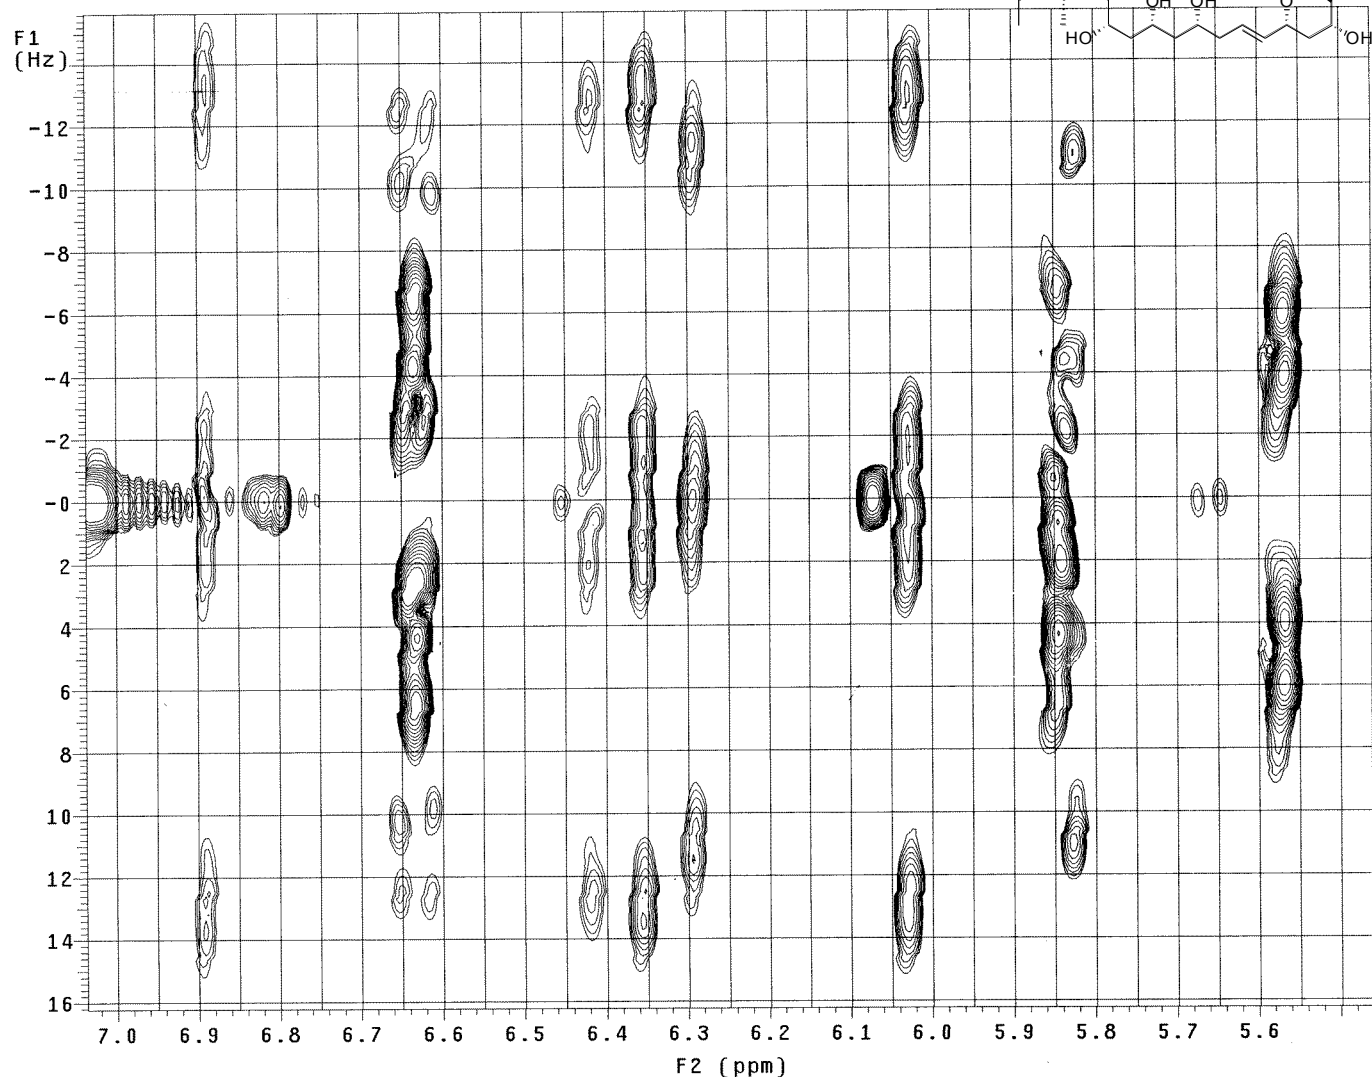

Figure S28. Expanded homo 2D  $J$ -resolved  $^1\text{H}$  NMR spectrum of **3** (500 MHz, pyridine- $d_5$ ).

Q140\_50\_1\_4m\_ROESY (500 MHz, pyri  
dine-d5)

Archive directory: /export/home/fenical/kwon/vnmrsys/data  
Sample directory: Q140\_50\_1\_4m\_ROESY\_12Jun2005

Pulse Sequence: ROESY  
Solvent: pyridine  
Temp. 25.0 C / 298.1 K  
File: ROESY  
INOVA-500 "nightmare500"

Relax. delay 3.000 sec  
Mixing 0.200 sec  
Acq. time 0.128 sec  
Width 7993.6 Hz  
2D Width 7993.6 Hz  
16 repetitions  
2 x 256 increments  
OBSERVE H1, 499.5881356 MHz  
DATA PROCESSING  
Gauss apodization 0.070 sec  
F1 DATA PROCESSING  
Gauss apodization 0.016 sec  
FT size 2048 x 2048  
Total time 7 hr, 42 min, 11 sec

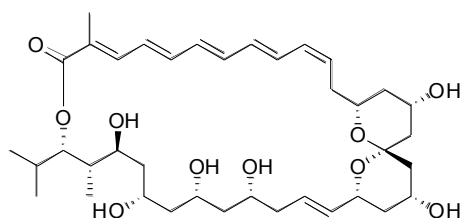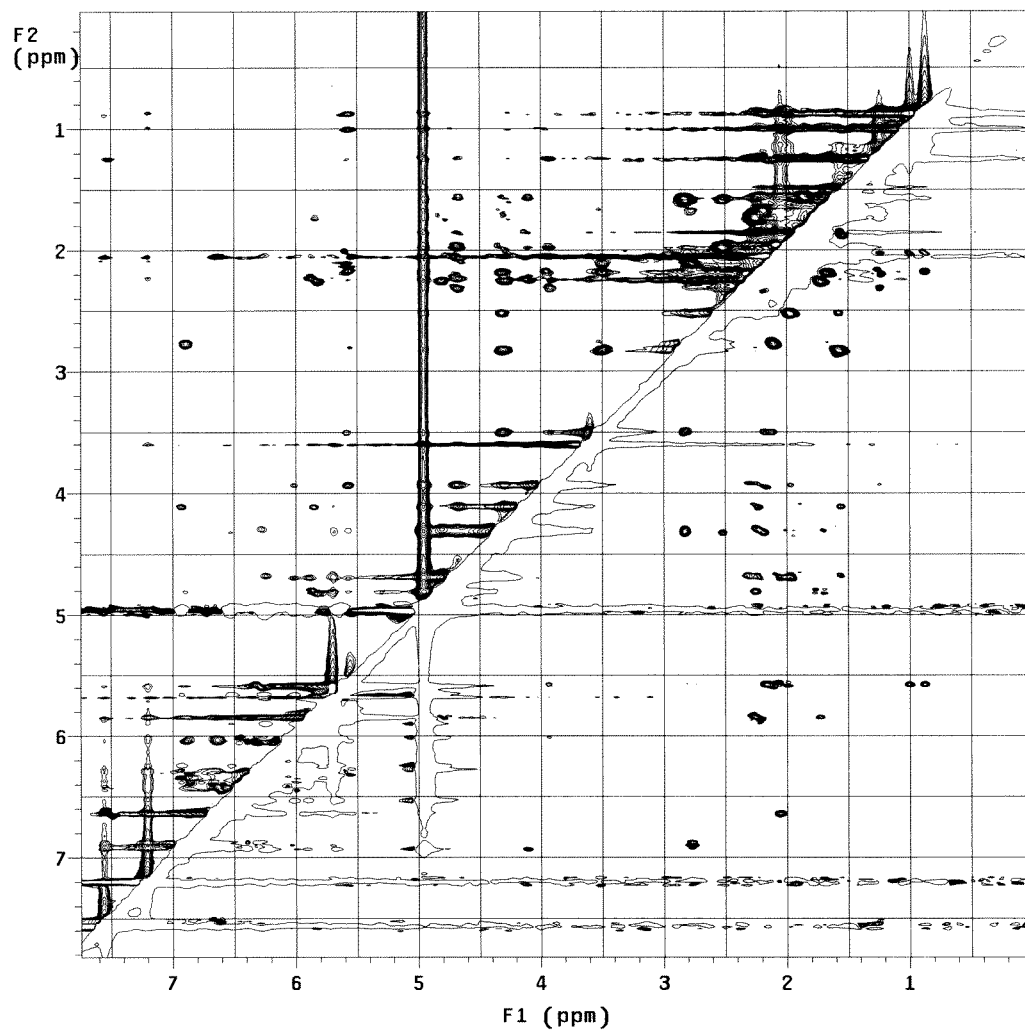

Figure S29. ROESY spectrum of 3 (500 MHz, pyridine- $d_5$ )

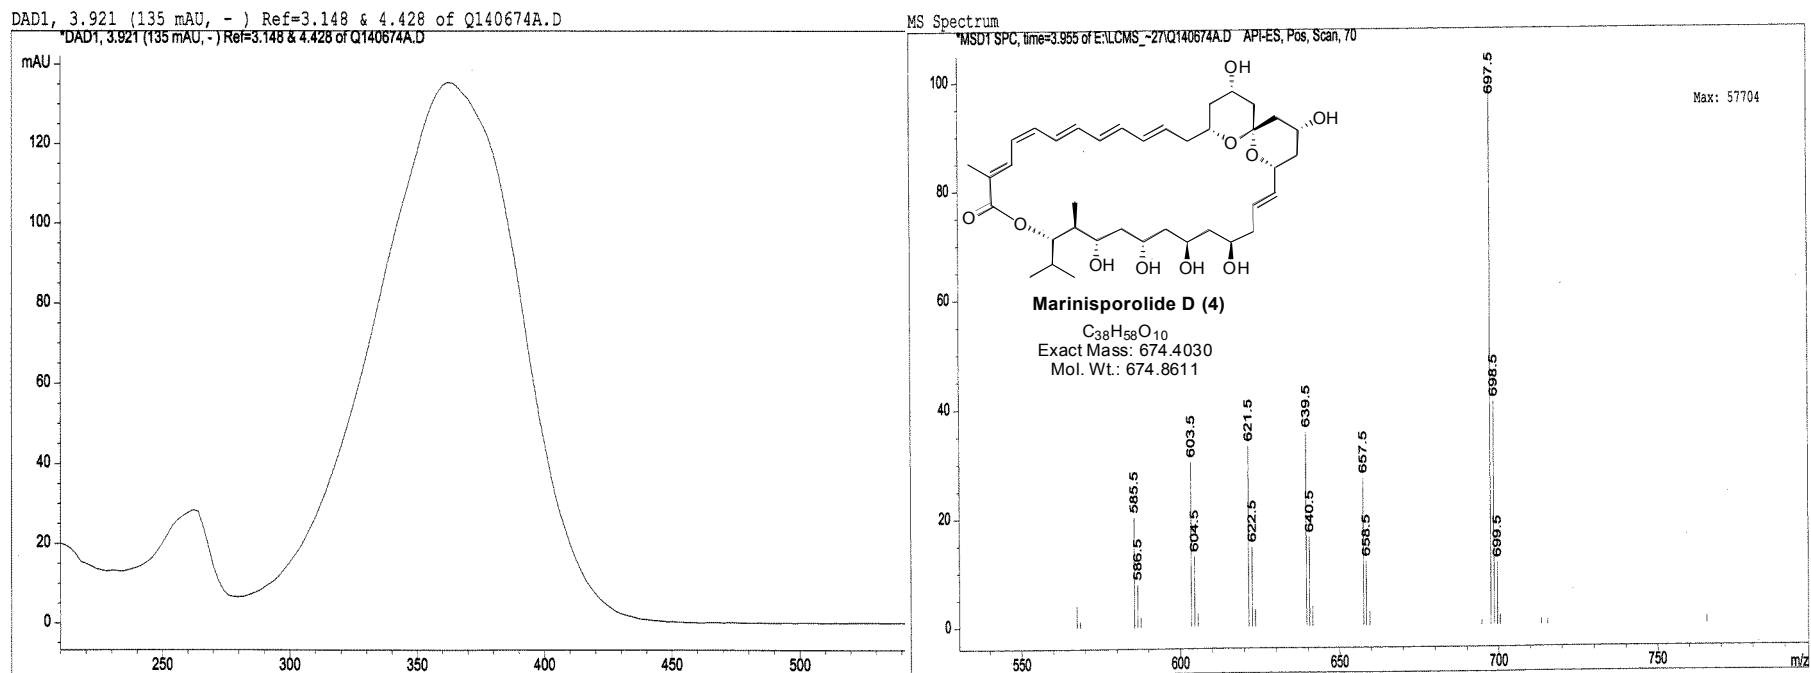

**Figure S30.** UV and ESI-MS spectra derived from HPLC-DAD-MSD (MeCN-H<sub>2</sub>O) of marinisporolide D (4)

Q140-50-1-1-5 (500 MHz, pyridine-d<sub>5</sub>)

Pulse Sequence: s2pul

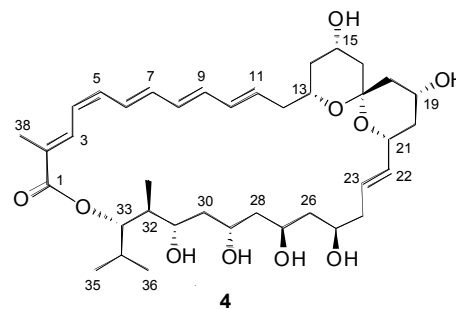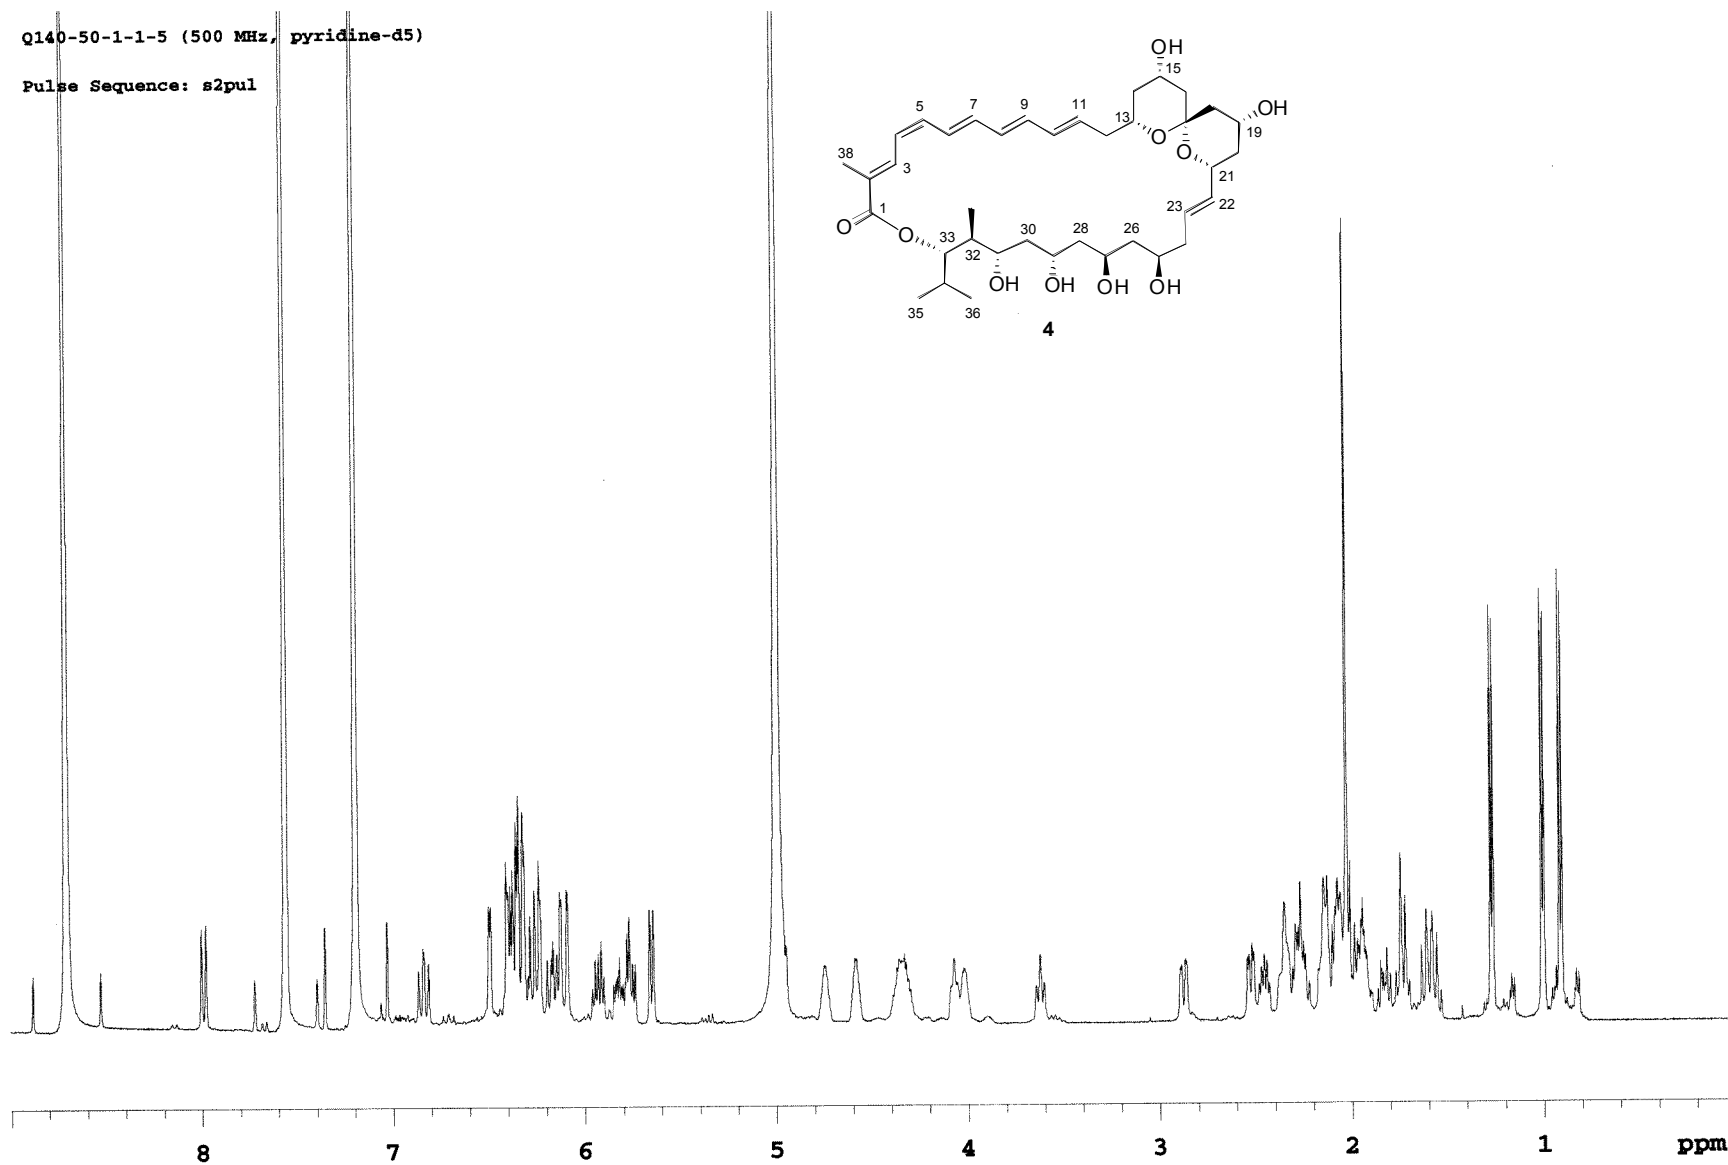

Figure S31. <sup>1</sup>H NMR spectrum of marinisporolide D (4) (500 MHz, pyridine-*d*<sub>5</sub>)

Q140-A1-50%-1-1-5-13C (125 MHz, pyridine-*d*<sub>5</sub>)  
Archive directory: /export/home/fenical/kwon/vnmr/sys/data  
Sample directory: Q140\_50\_1\_1\_5\_13C\_500M\_BB\_Pr\_pyridine\_30May2004  
File: CARBON  
Pulse Sequence: s2pu1

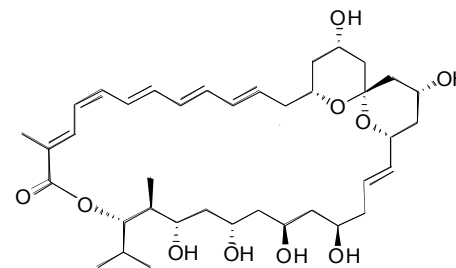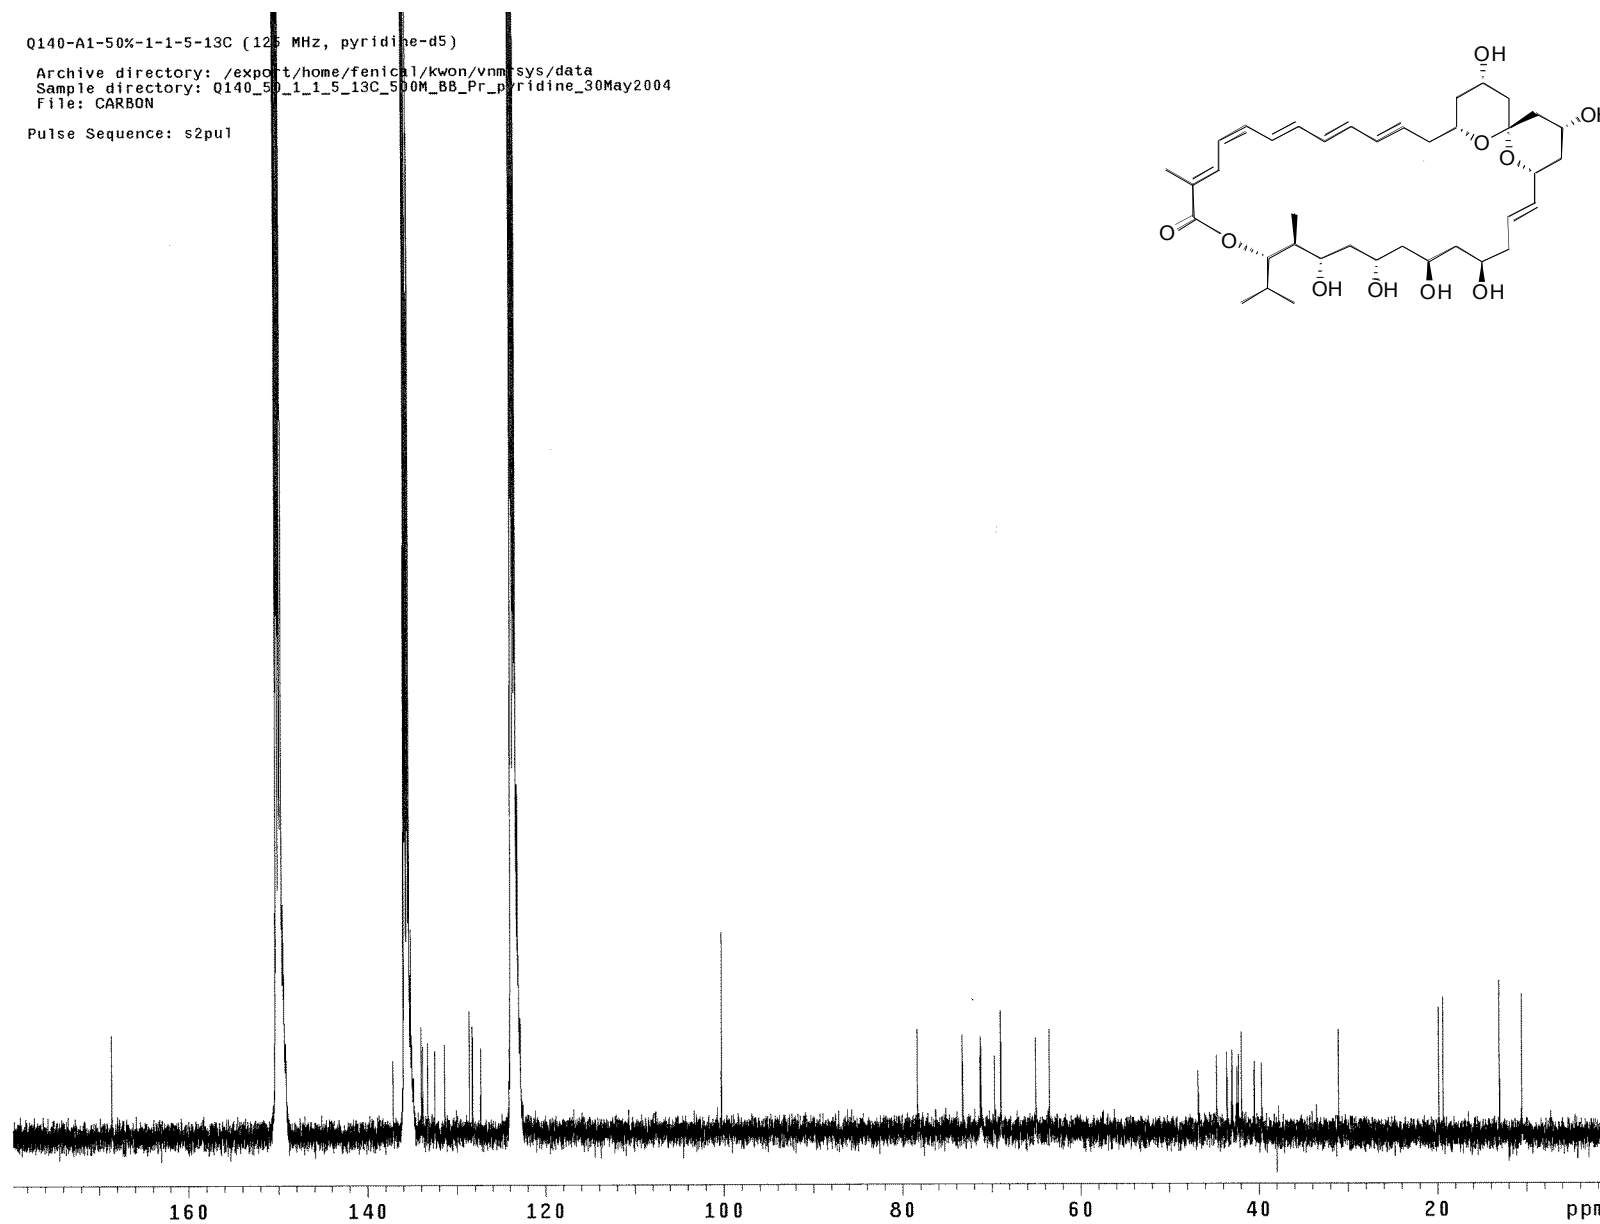

Figure S32. <sup>13</sup>C NMR spectrum of **4** (125 MHz, pyridine-*d*<sub>5</sub>)

Q140-A1-50%-1-1-5-hom2dj (500 MHz, pyridine-d5)

Pulse Sequence: hom2dj

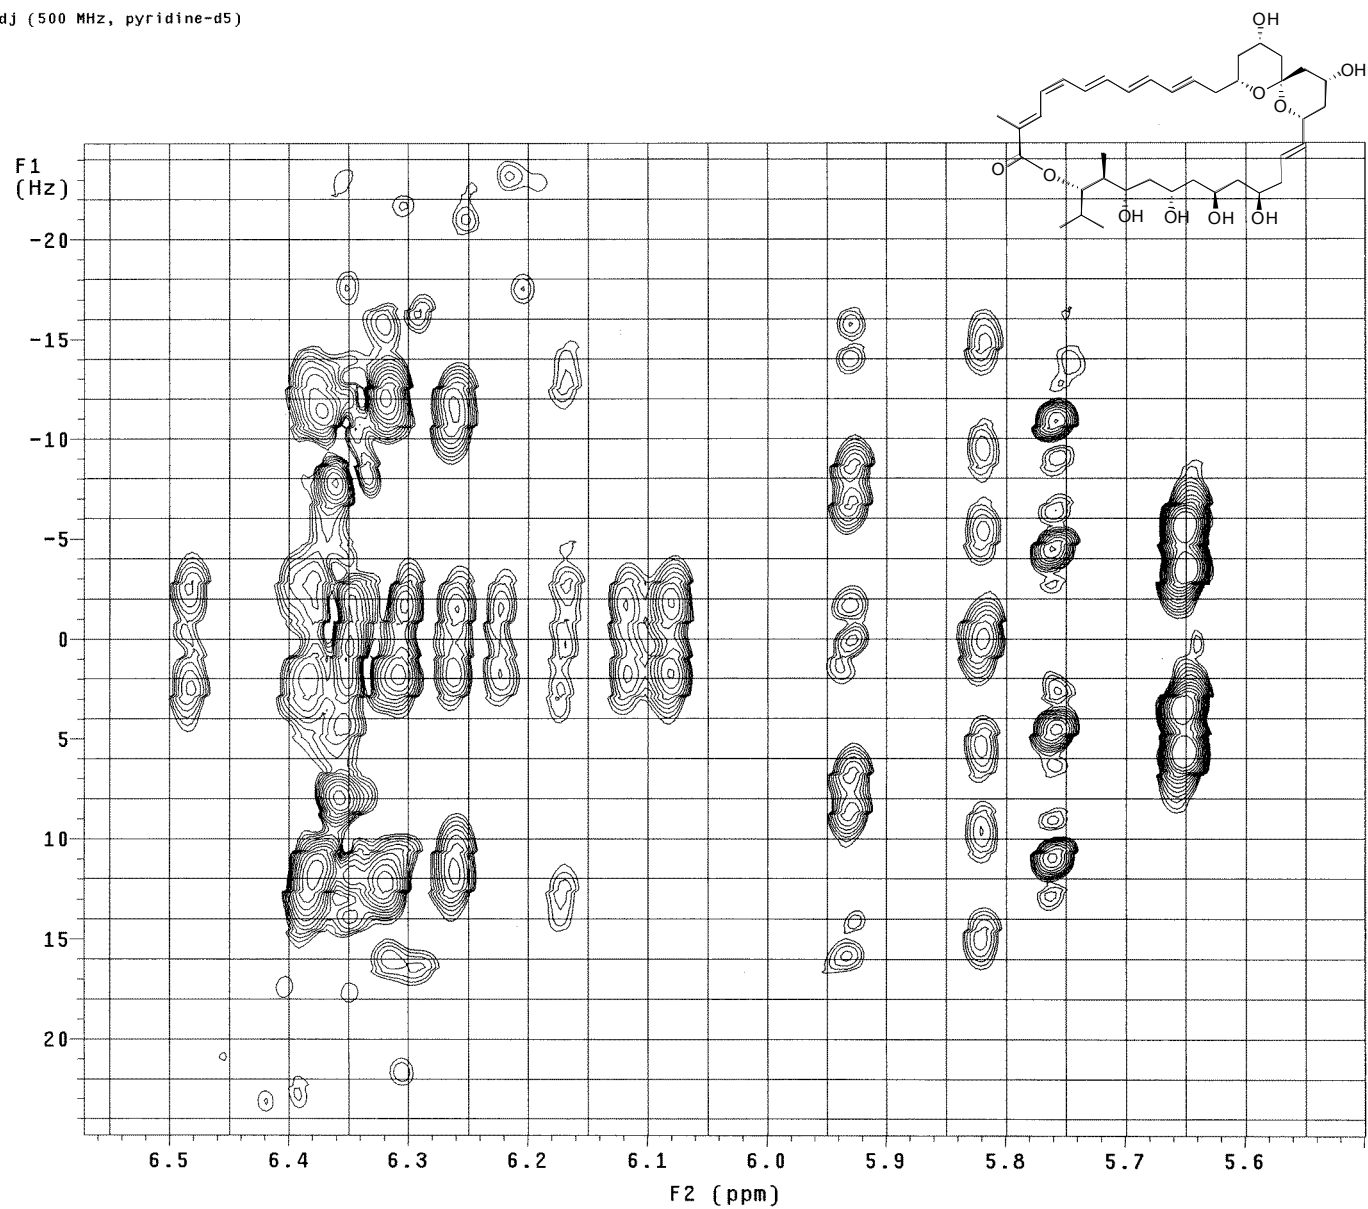

Figure S33. Homo 2D *J*-resolved <sup>1</sup>H NMR spectrum of 4 (500 MHz, pyridine-d<sub>5</sub>).

Q140-A1-50-1-1-5 (500 MHz, pyridine-d5) 2

Pulse Sequence: ROESY

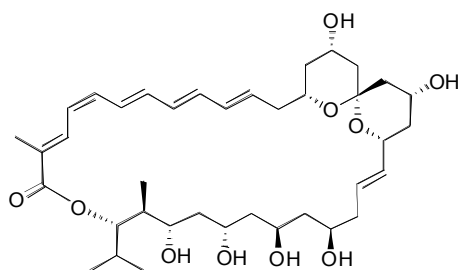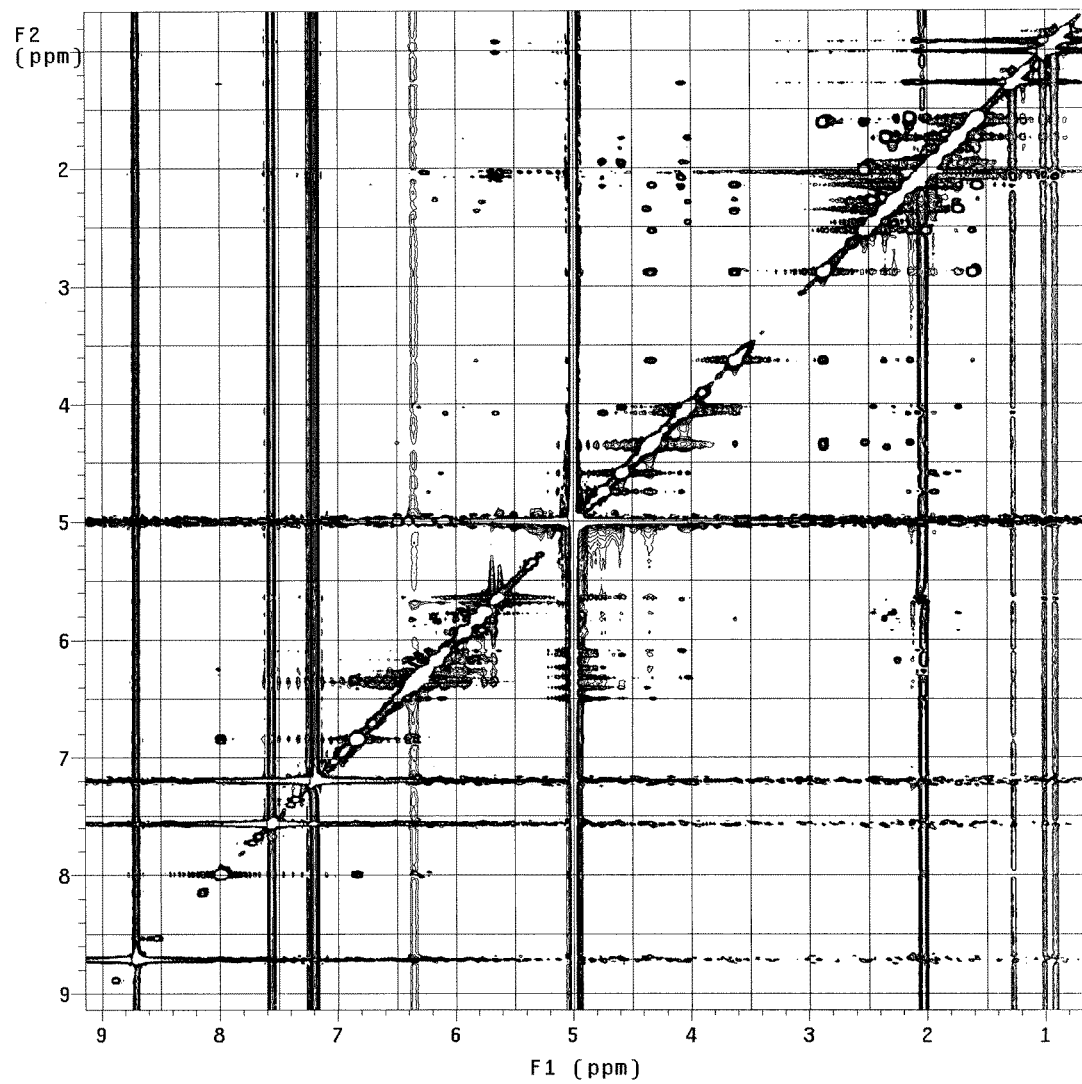

Figure S34. ROESY spectrum of 4 (500 MHz, pyridine-*d*<sub>5</sub>)

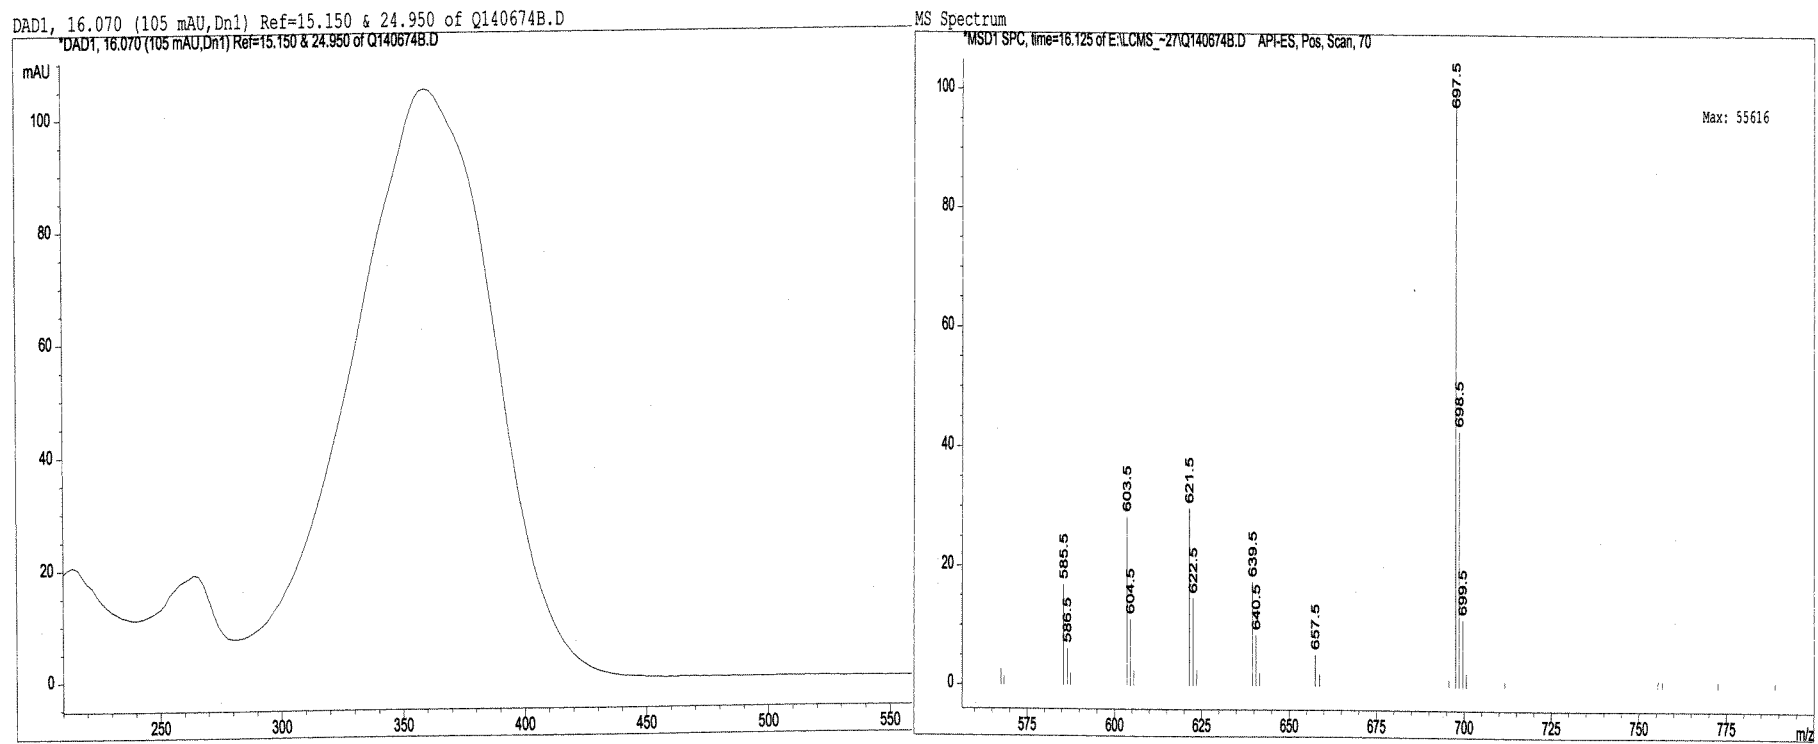

**Figure S35.** UV and ESI-MS spectra derived from HPLC-DAD-MSD (MeCN-H<sub>2</sub>O) of marinisporolide E (**5**)



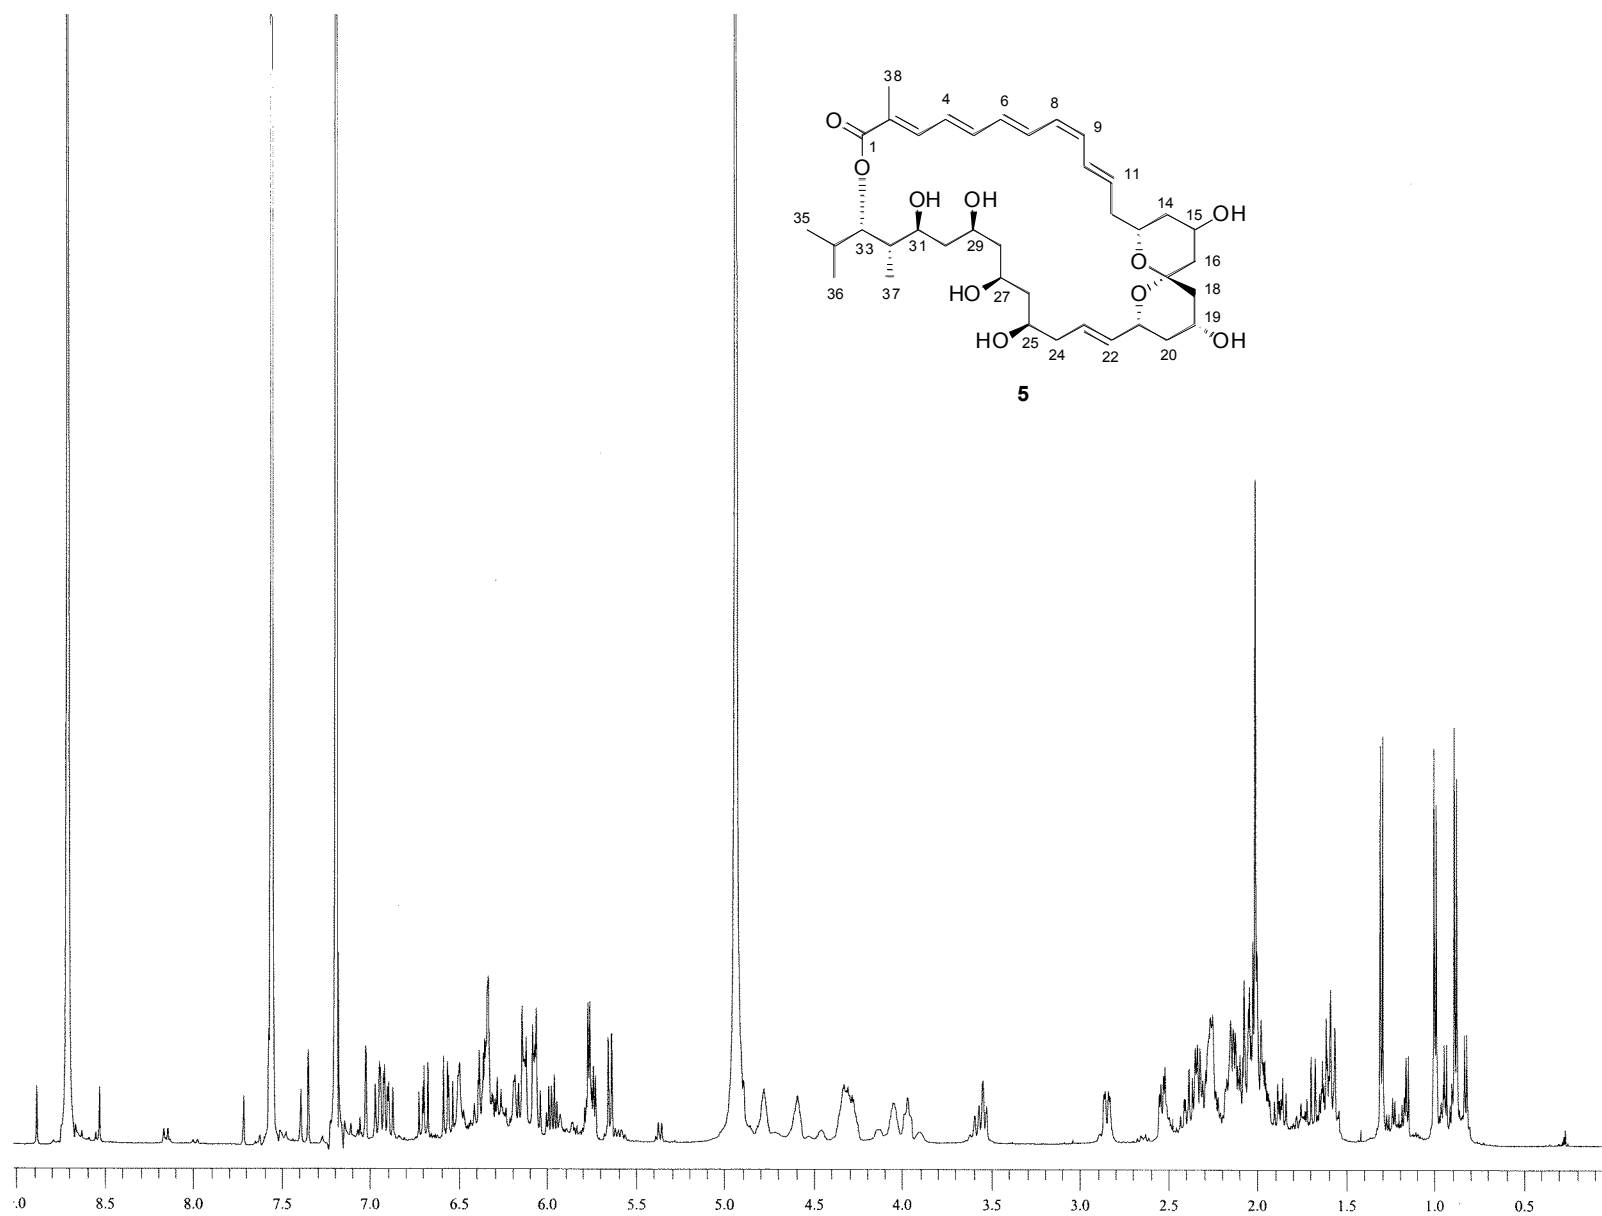

**Figure S36.** <sup>1</sup>H NMR spectrum of marinisporolide E (**5**) (500 MHz, pyridine-*d*<sub>5</sub>).



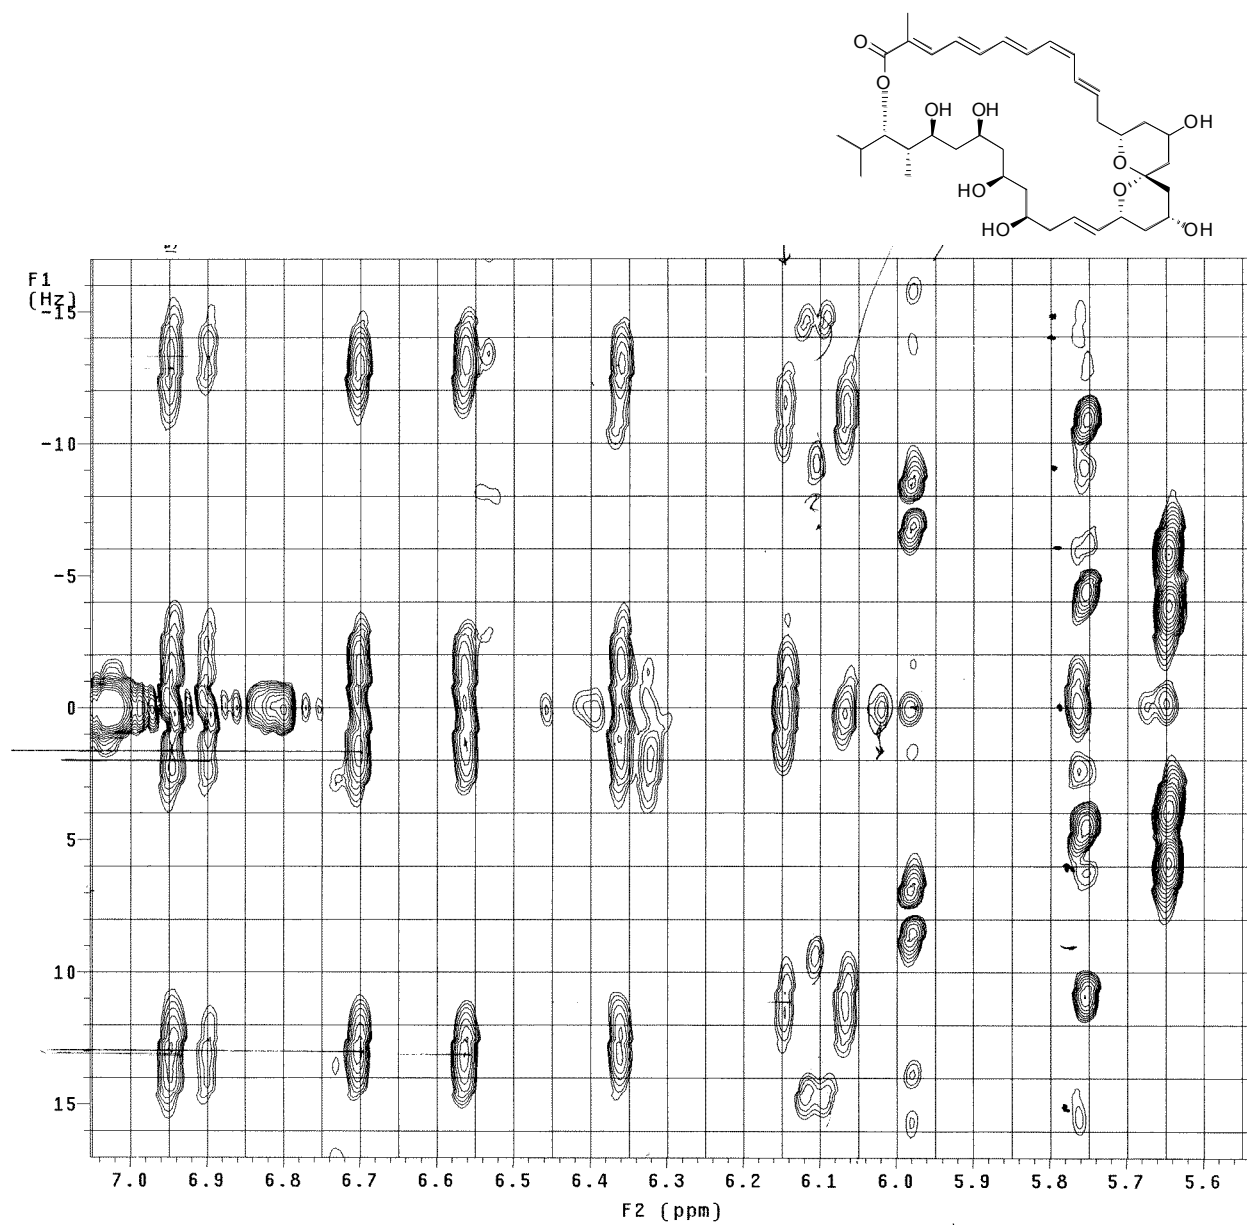

**Figure S38.** Expanded homo 2D  $J$ -resolved  $^1\text{H}$  NMR spectrum of **5** (500 MHz, pyridine- $d_5$ ).

Q140\_A1\_50\_1\_2\_2\_23Jun2004

Archive directory: /export/home/fenical/kwon/vnmrsys/data  
Sample directory: Q140\_A1\_50\_1\_2\_2\_23Jun2004  
File: ROESY

Pulse Sequence: ROESY

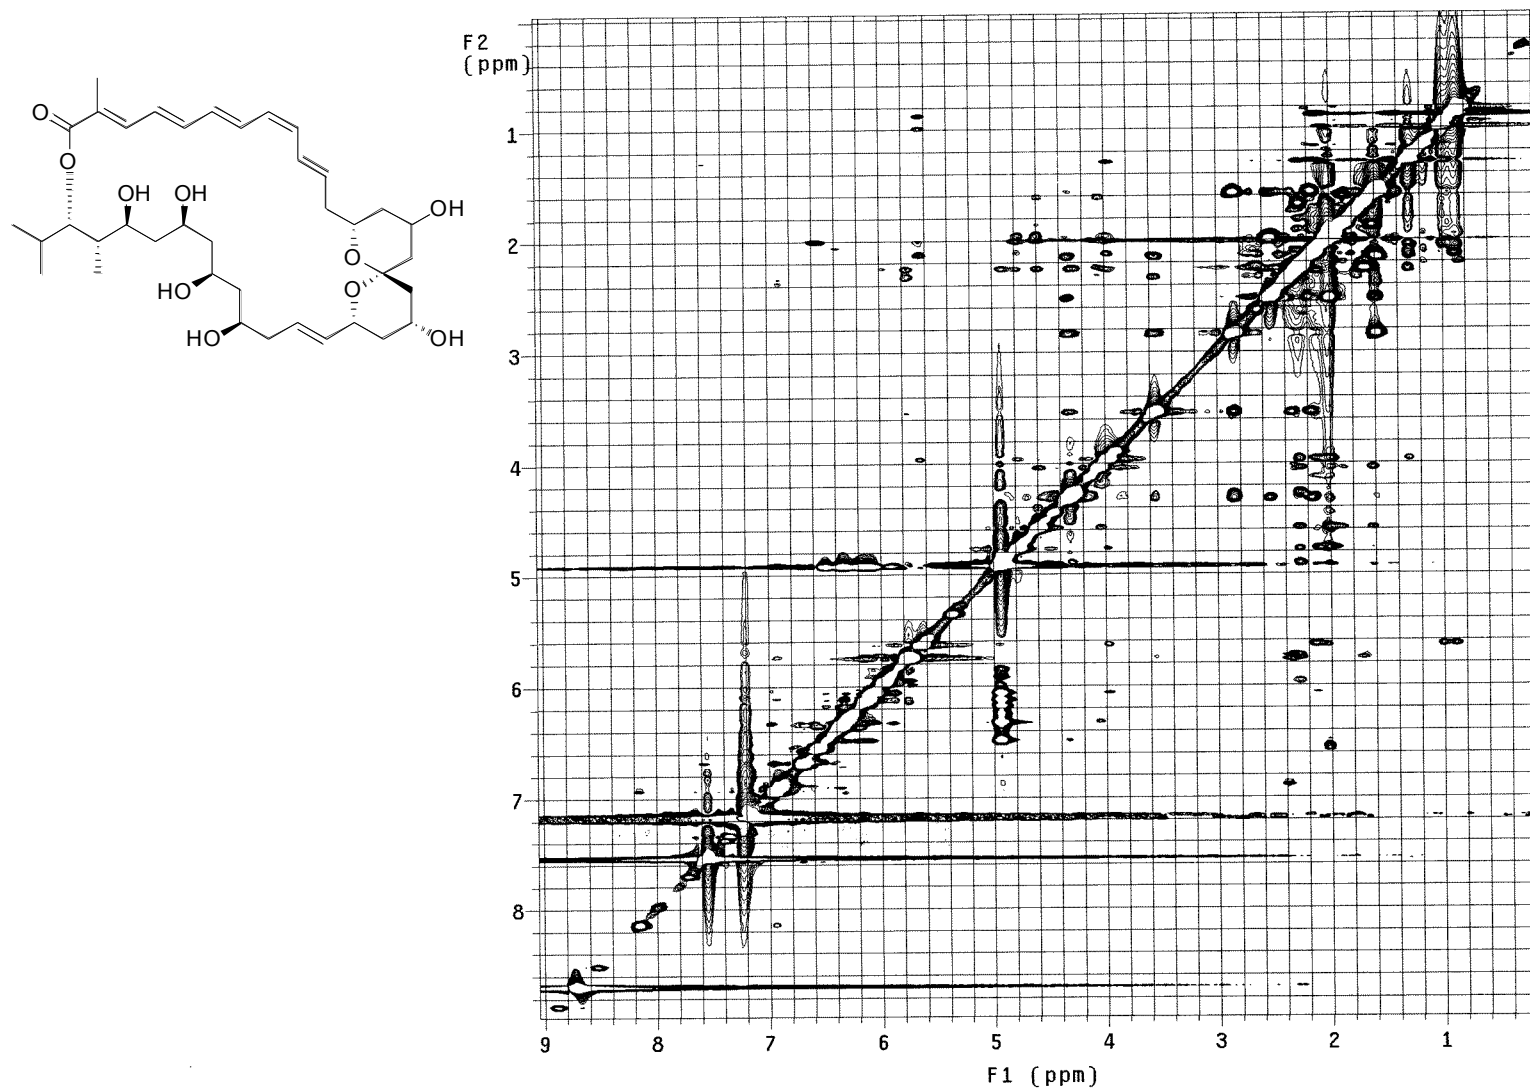

Figure S39. ROESY spectrum of **5** (500 MHz, pyridine-*d*<sub>5</sub>).

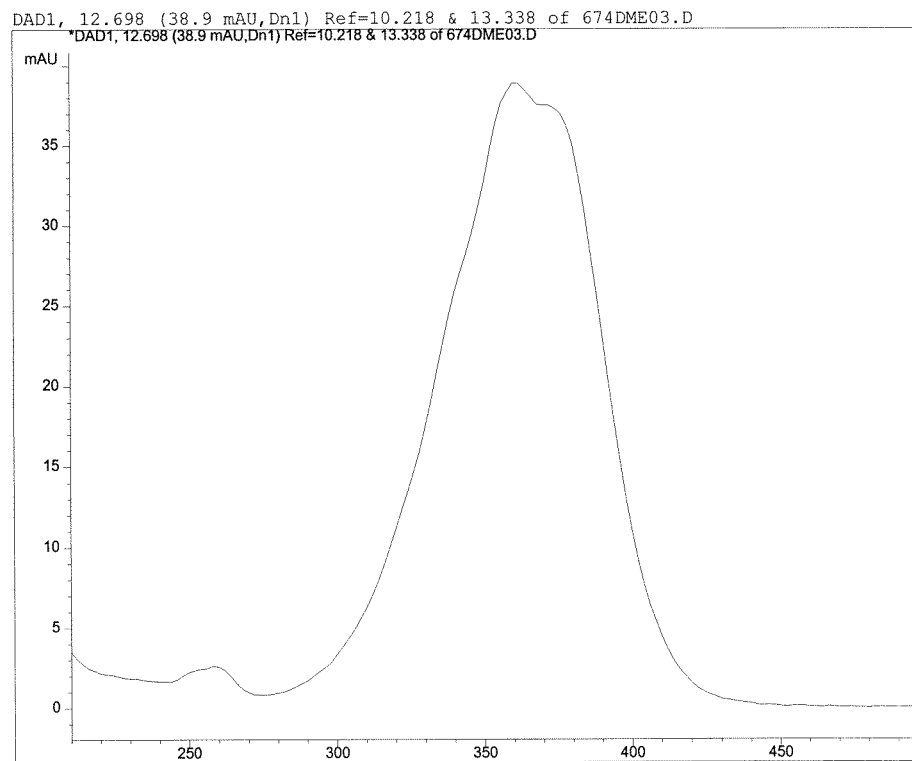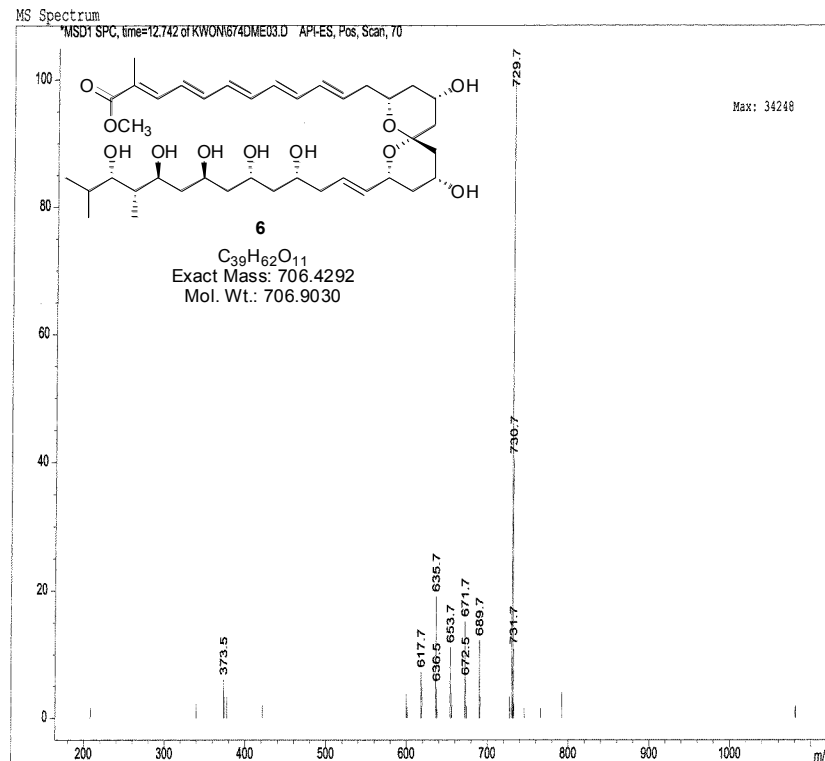

**Figure S40.** UV and ESI-MS spectra derived from HPLC-DAD-MSD of compound 6.

Q140\_674\_m221\_methanolysis\_1st (500 MHz, DMSO-d6)

Archive directory: /export/home/fenical/kwon/vnmrsys/data

Sample directory:

File: PROTON

Pulse Sequence: s2pu1

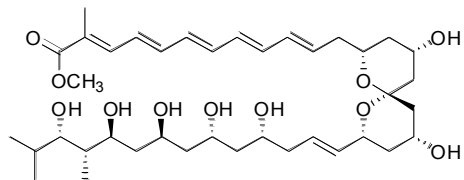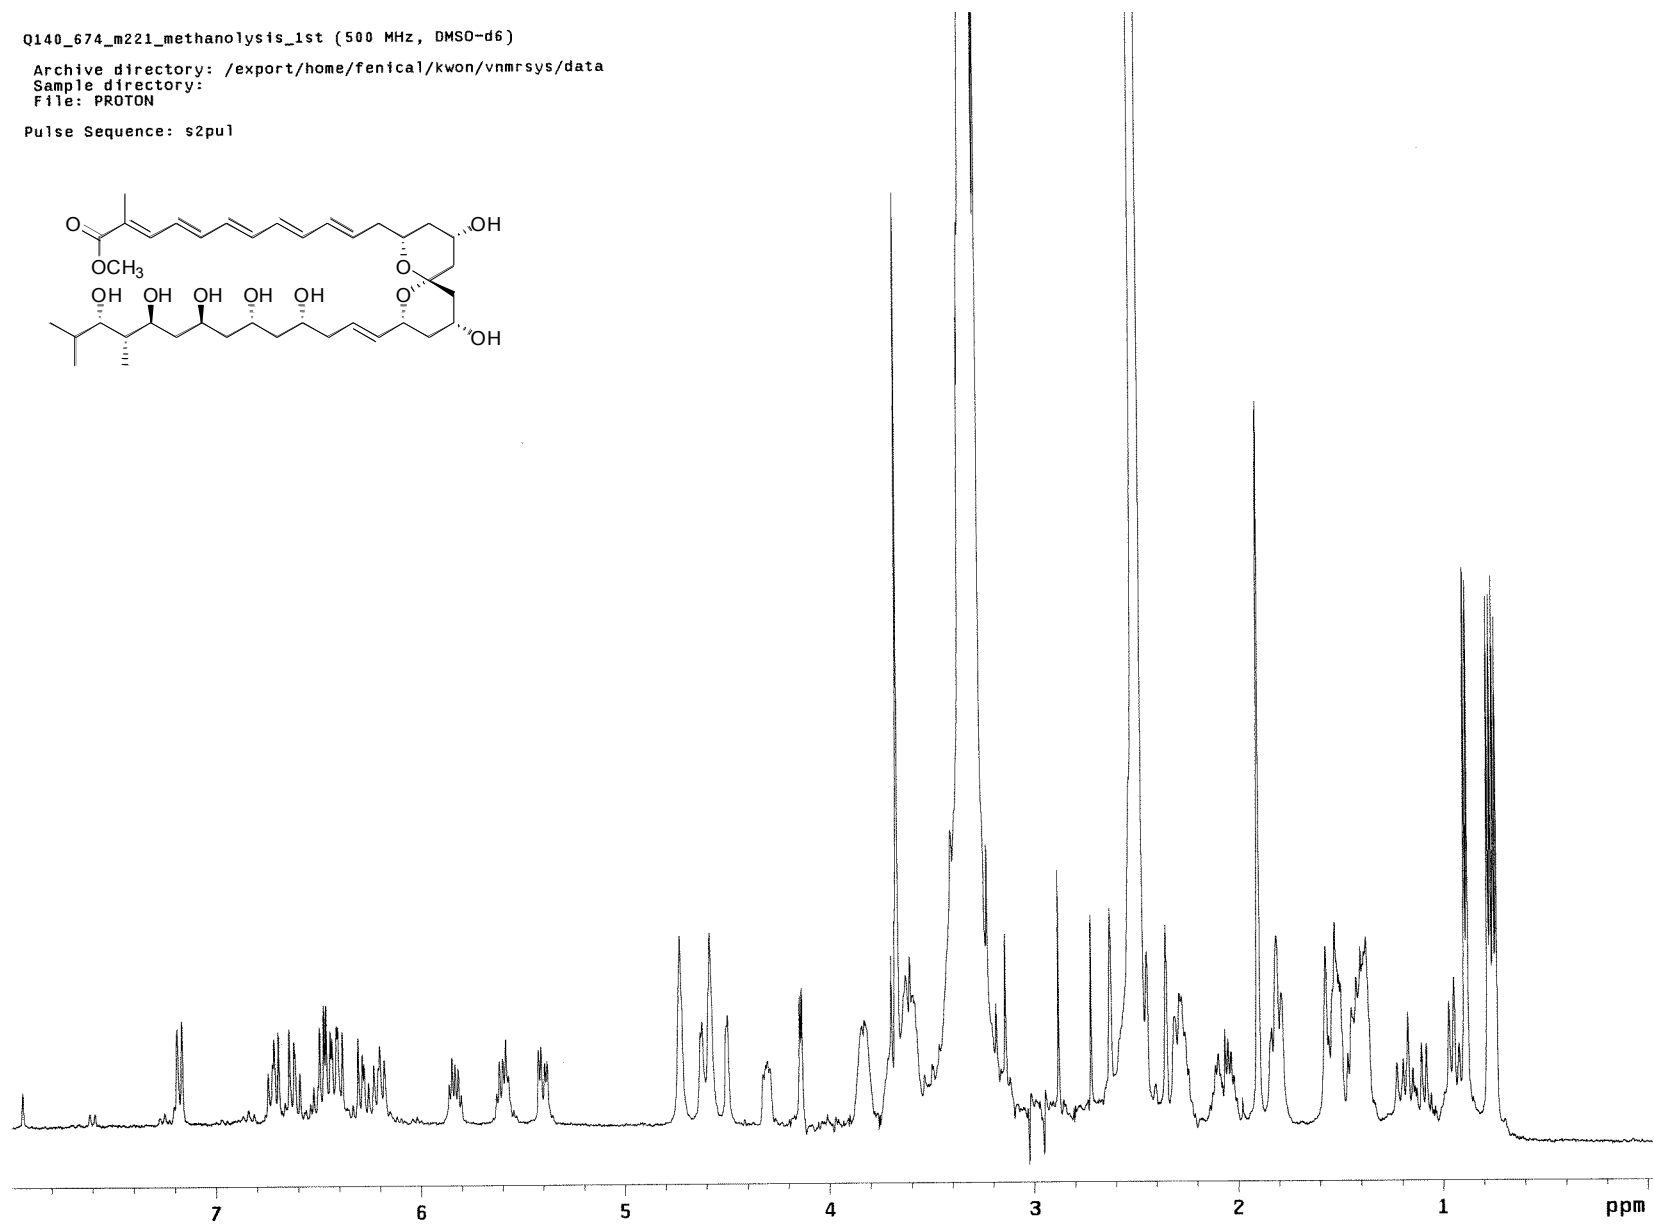

Figure S41. <sup>1</sup>H NMR spectrum of **6** (500 MHz, DMSO-*d*<sub>6</sub>)

Q140\_692\_2\_B\_Metanalysis

Archive directory: /export/home/fenical/kwon/vnmrsys/data  
Sample directory: Q140\_692\_2\_B\_Metha\_HMQC\_12Sep2005  
File: gHMQC

Pulse Sequence: gHMQC

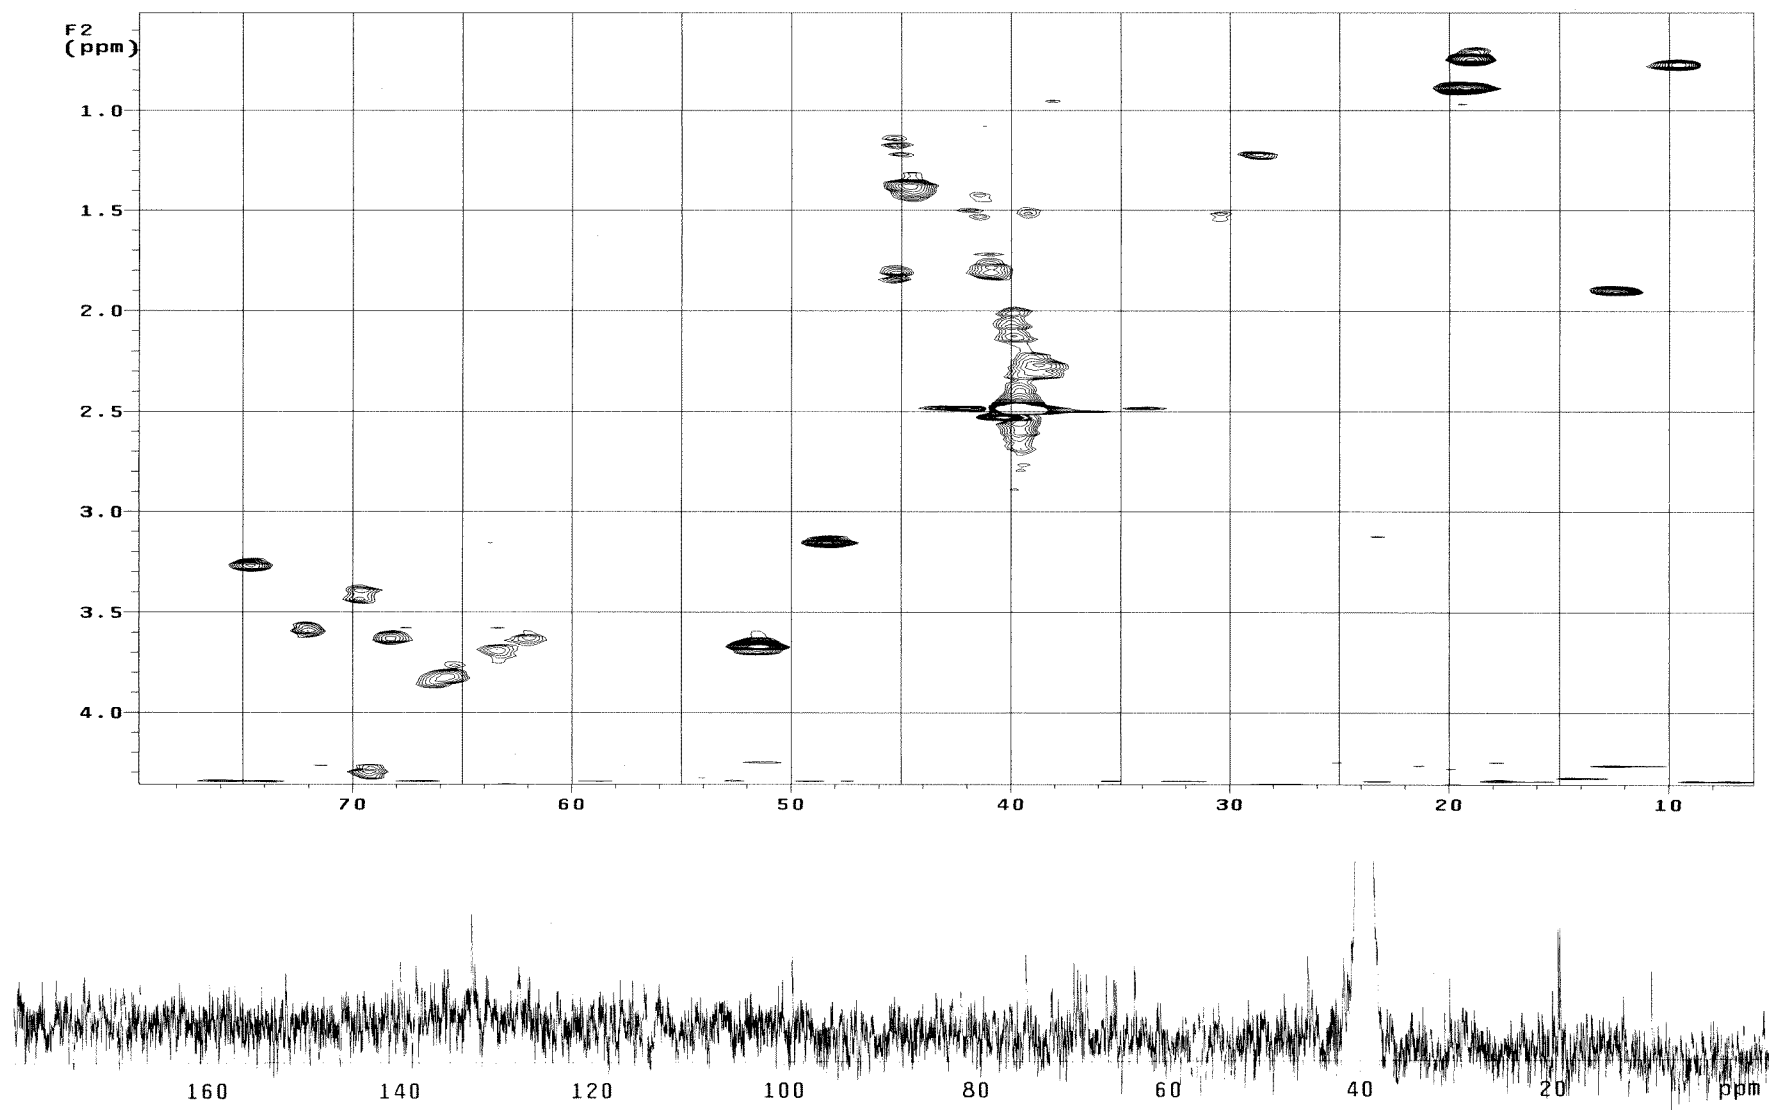

**Figure S42.** Expanded gHMQC spectrum (500 MHz, DMSO- $d_6$ ) and  $^{13}\text{C}$  NMR spectrum (75 MHz, DMSO- $d_6$ ) of **6**.

DAD1, 21.069 (50.0 mAU, - ) Ref=20.442 & 21.309 of SS7ACE42.D  
\*DAD1, 21.069 (50.0 mAU, - ) Ref=20.442 & 21.309 of SS7ACE42.D

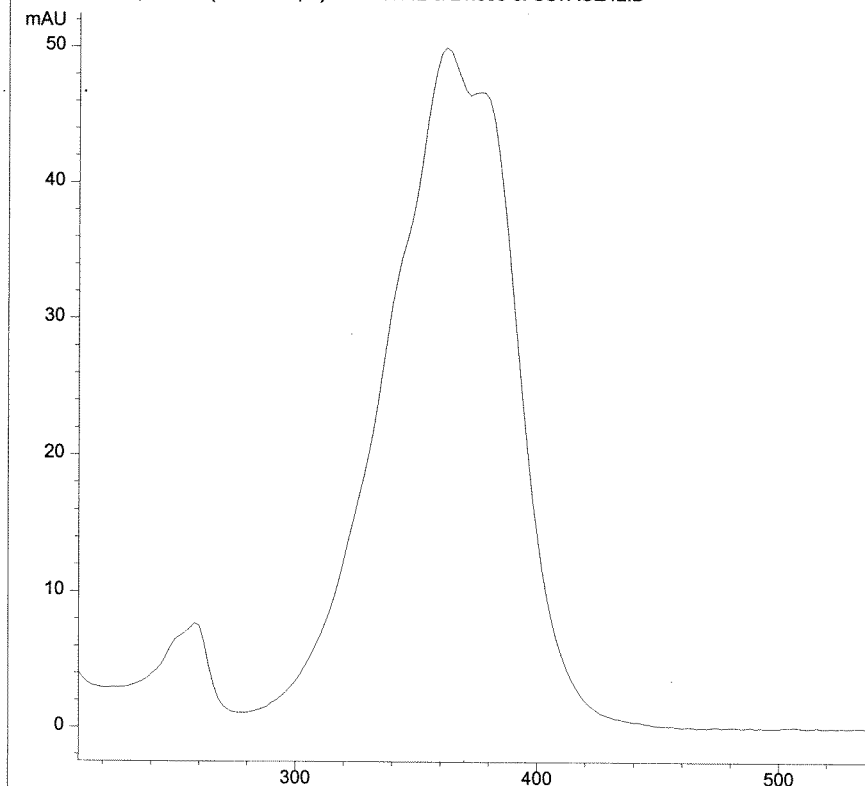

MS Spectrum

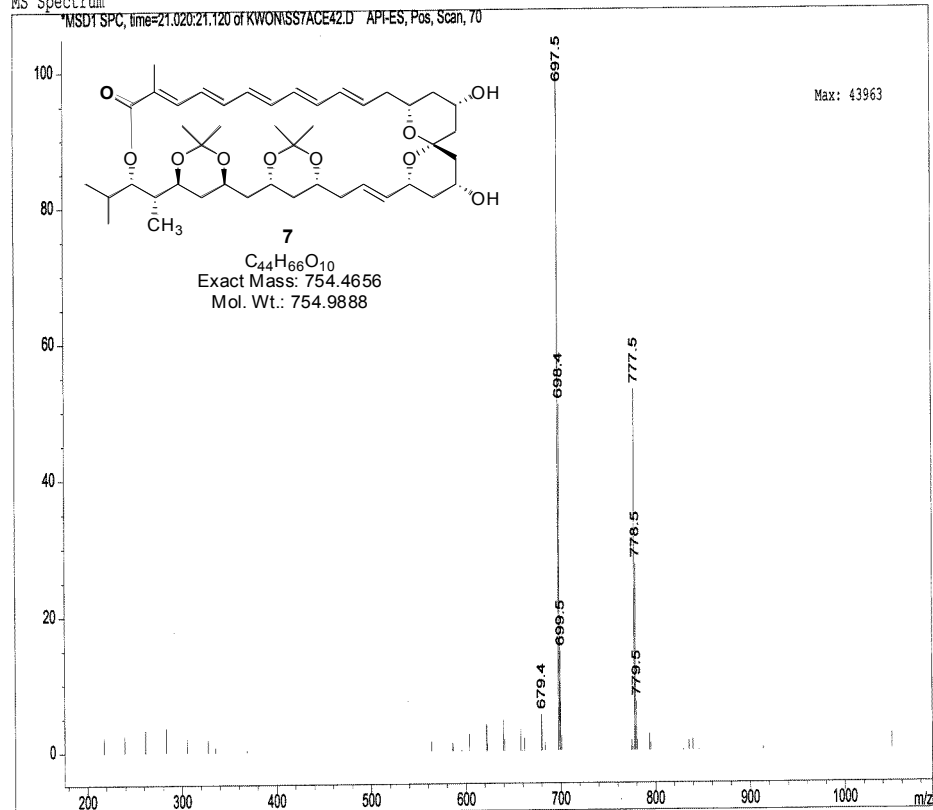

**Figure S43.** UV and ESI-MS spectra derived from HPLC-DAD-MSD of compound 7.



Q140\_692\_SS\_7\_Acetonide\_4\_2 (500  
MHz, CD<sub>3</sub>CN)

Archive directory: /export/home/fenical/kwon/vnmrsys/data  
Sample directory: Q140\_692\_SS\_7\_ACeto\_4\_2\_19Sep2005

Pulse Sequence: s2pu1

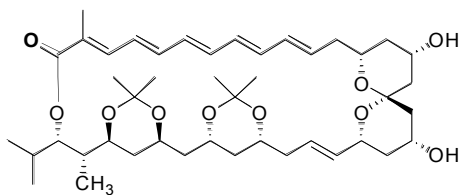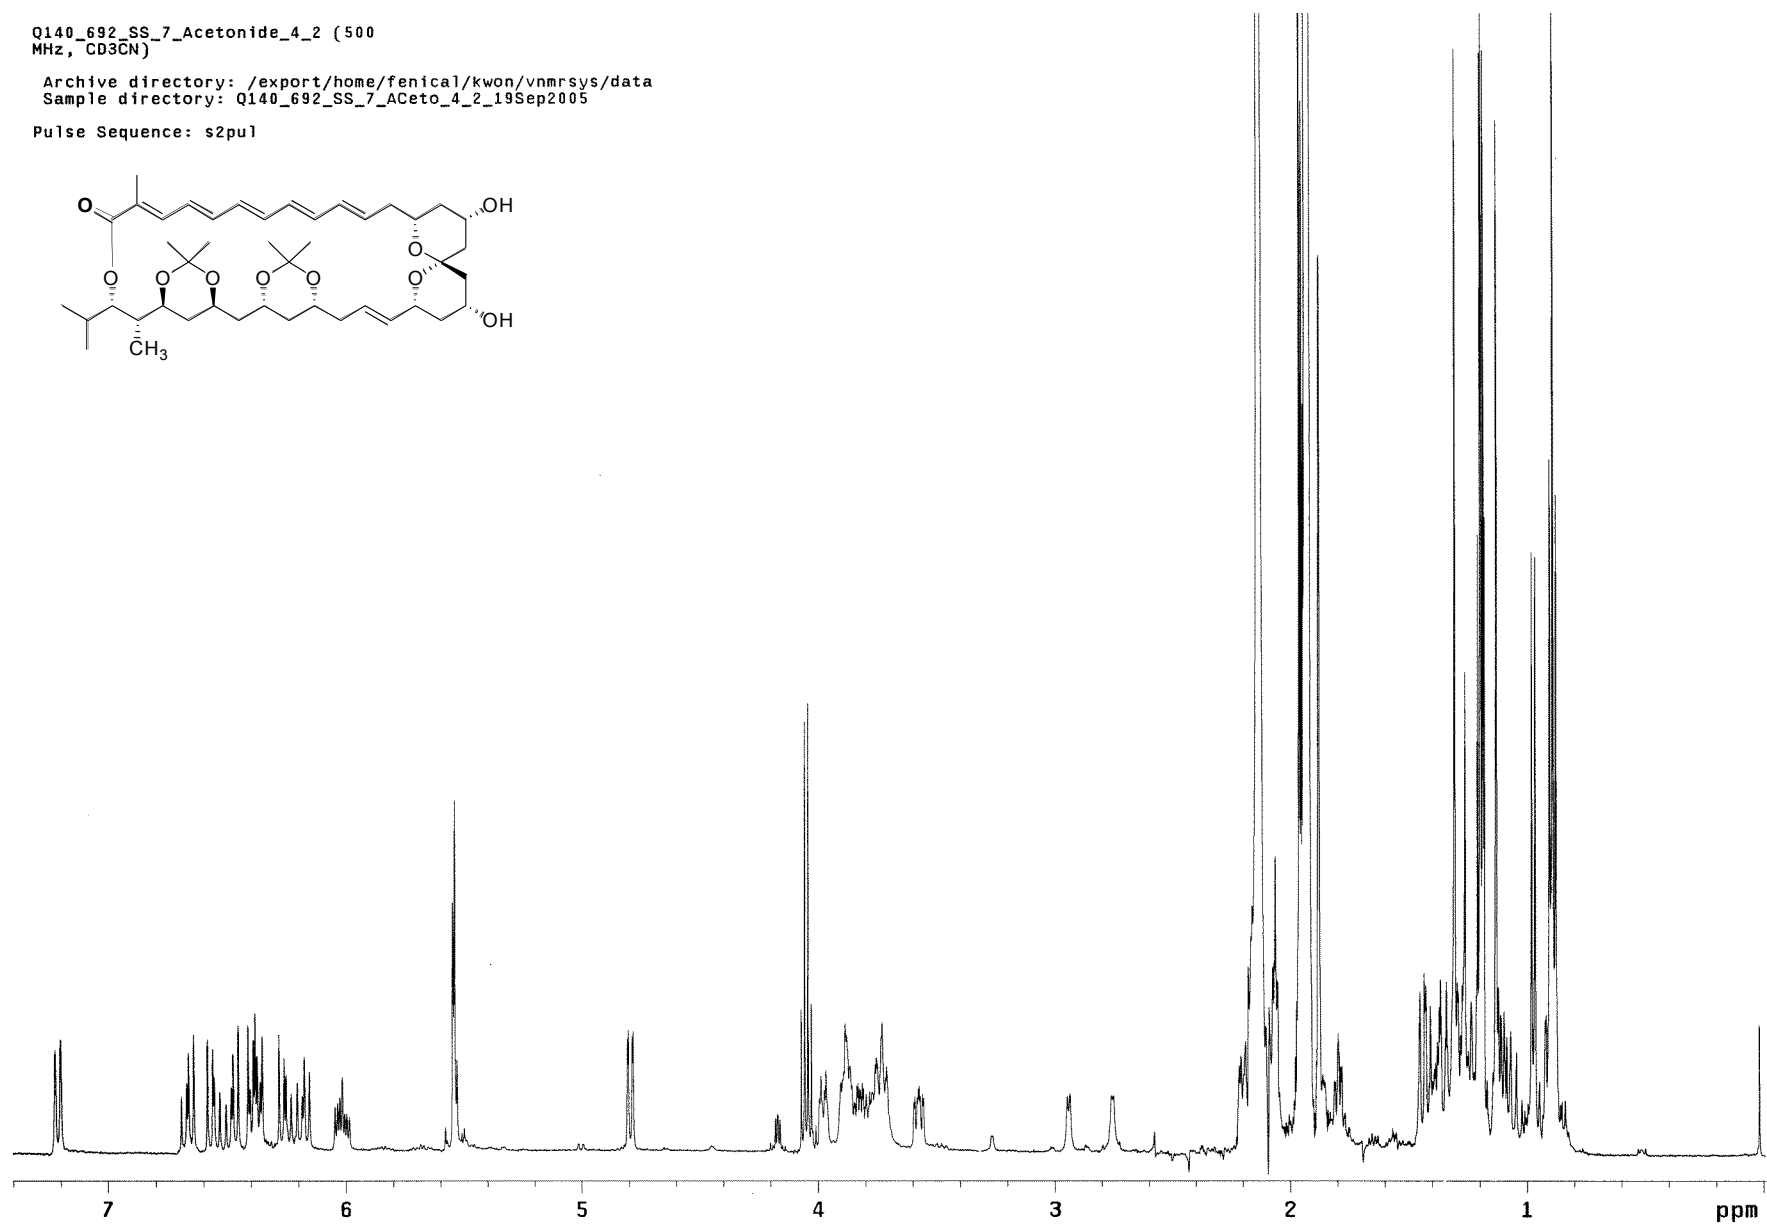

Figure S44. <sup>1</sup>H NMR spectrum of 7 (500 MHz, CD<sub>3</sub>CN).

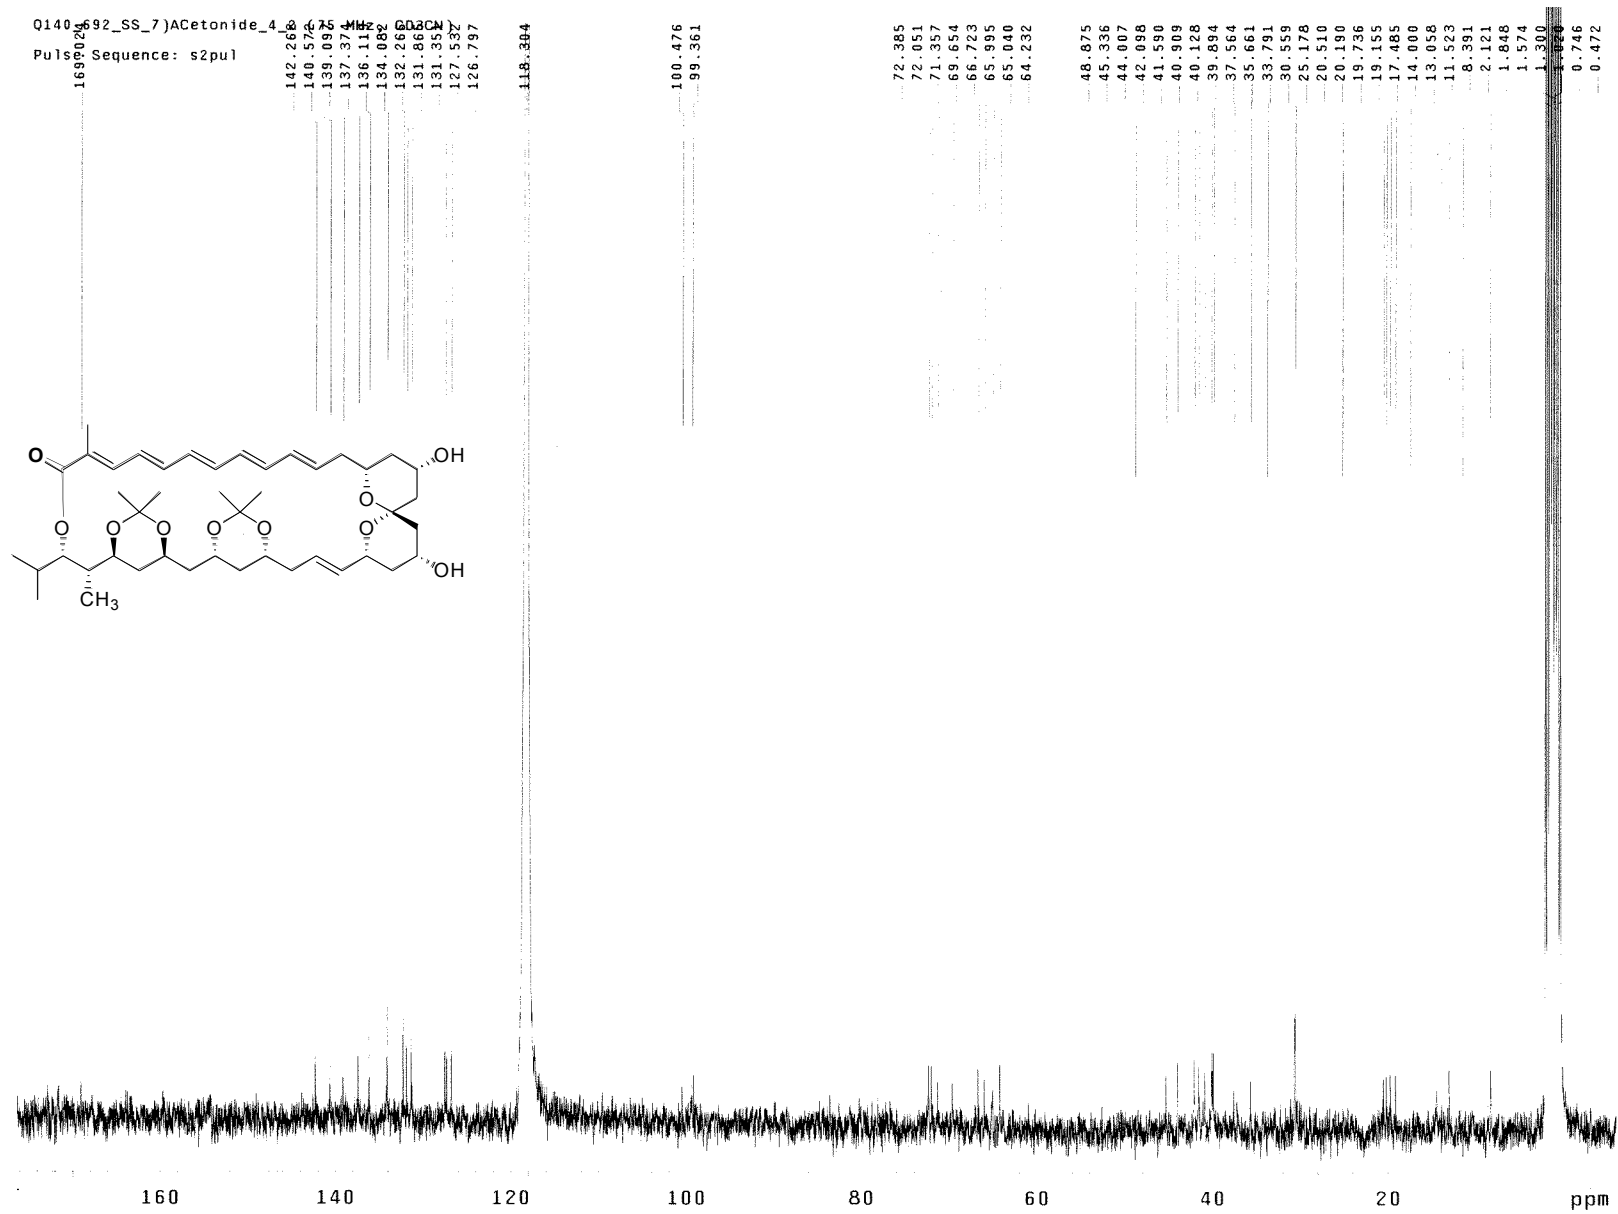

Figure S45.  $^{13}\text{C}$  NMR spectrum of **7** (75 MHz,  $\text{CD}_3\text{CN}$ ).

Q140\_692\_SS\_7\_Acetonide\_4\_2 (500  
MHz, CD<sub>3</sub>CN)

Archive directory: /export/home/fenical/kwon/vnmrsys/data  
Sample directory: Q140\_692\_SS\_7\_Aceto\_4\_2\_HMQC\_19Sep2005  
File: gHMQC

Pulse Sequence: gHMQC

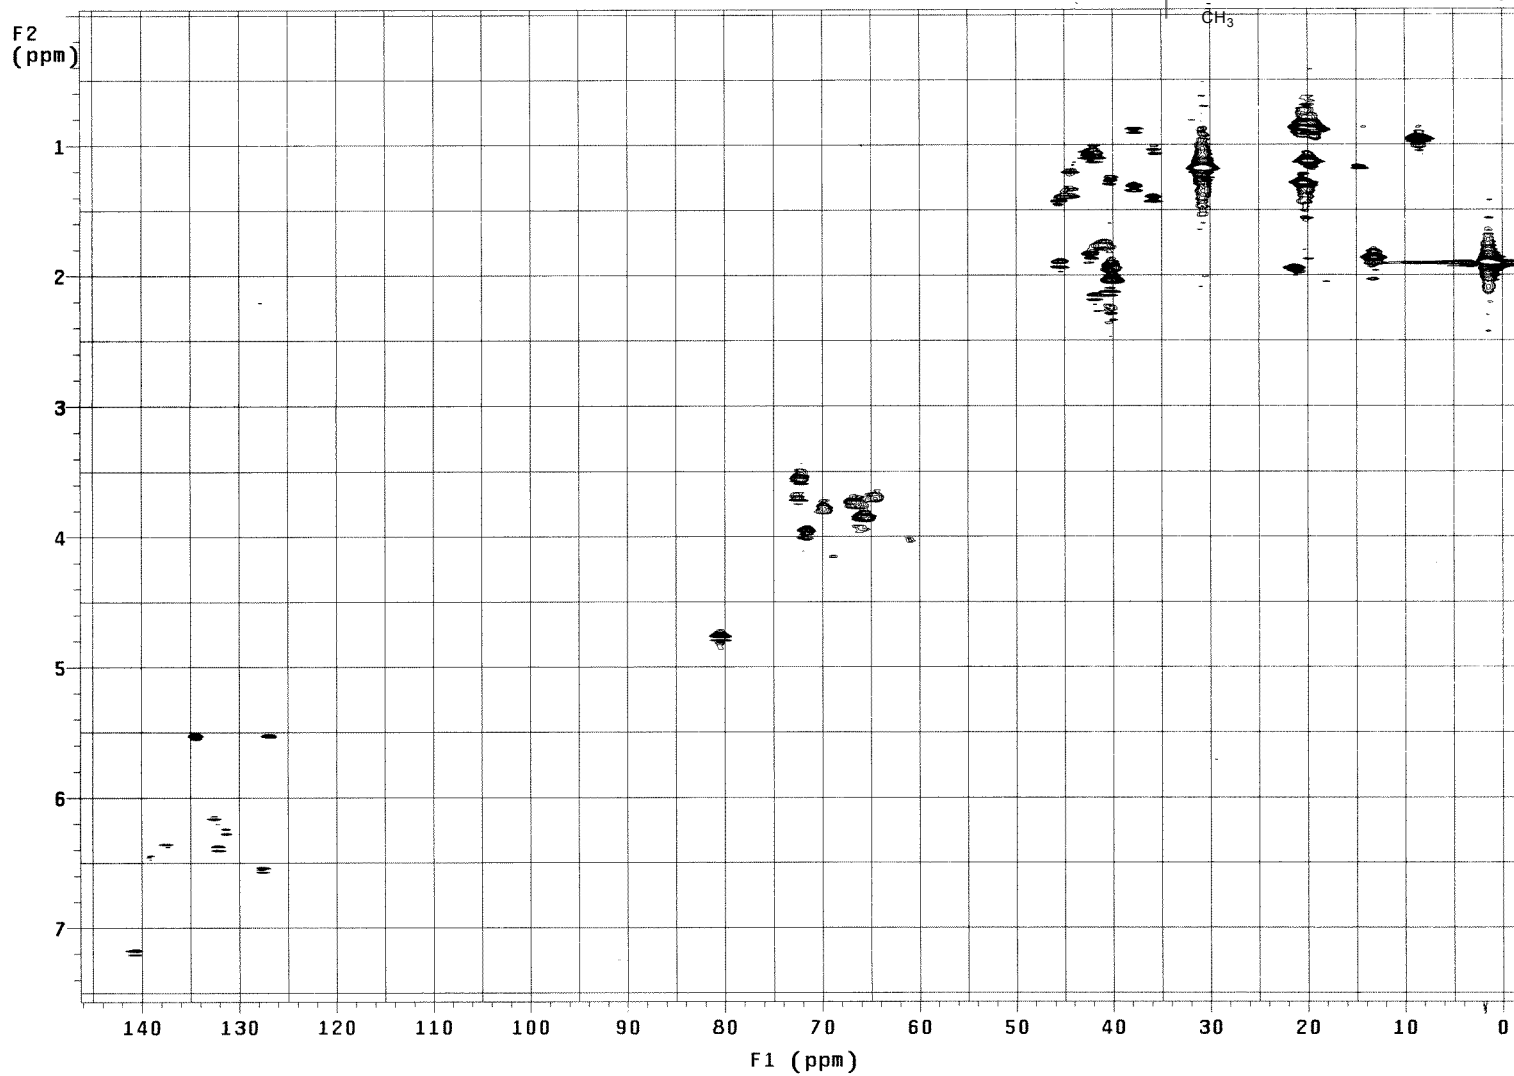

Figure S46. gHMQC spectrum of 7 (500 MHz, CD<sub>3</sub>CN).

Q140\_692\_SS\_7\_Acetonide\_4\_2\_ROESY  
(500 MHz, CD<sub>3</sub>CN, 25C)

Archive directory: /export/home/fenical/kwon/vnmrsys/data  
Sample directory: Q140\_692\_SS\_7\_Acetonide\_ROESY\_500\_CD3CN\_22Sep2005

Pulse Sequence: ROESY

Solvent: CD<sub>3</sub>CN  
Temp. 25.0 C / 298.1 K  
File: ROESY  
INOVA-500 "nightmare500"

Relax. delay 3.000 sec  
Mixing 0.200 sec  
Acq. time 0.205 sec  
Width 4995.9 Hz  
2D Width 4995.9 Hz  
32 repetitions  
2 x 256 increments  
OBSERVE H1, 499.5907954 MHz  
DATA PROCESSING  
Gauss apodization 0.095 sec  
F1 DATA PROCESSING  
Gauss apodization 0.022 sec  
FT size 2048 x 2048  
Total time 15 hr, 44 min, 29 sec

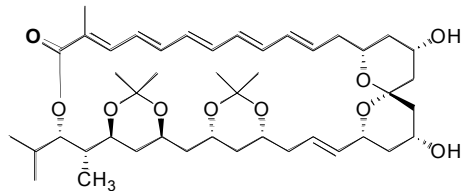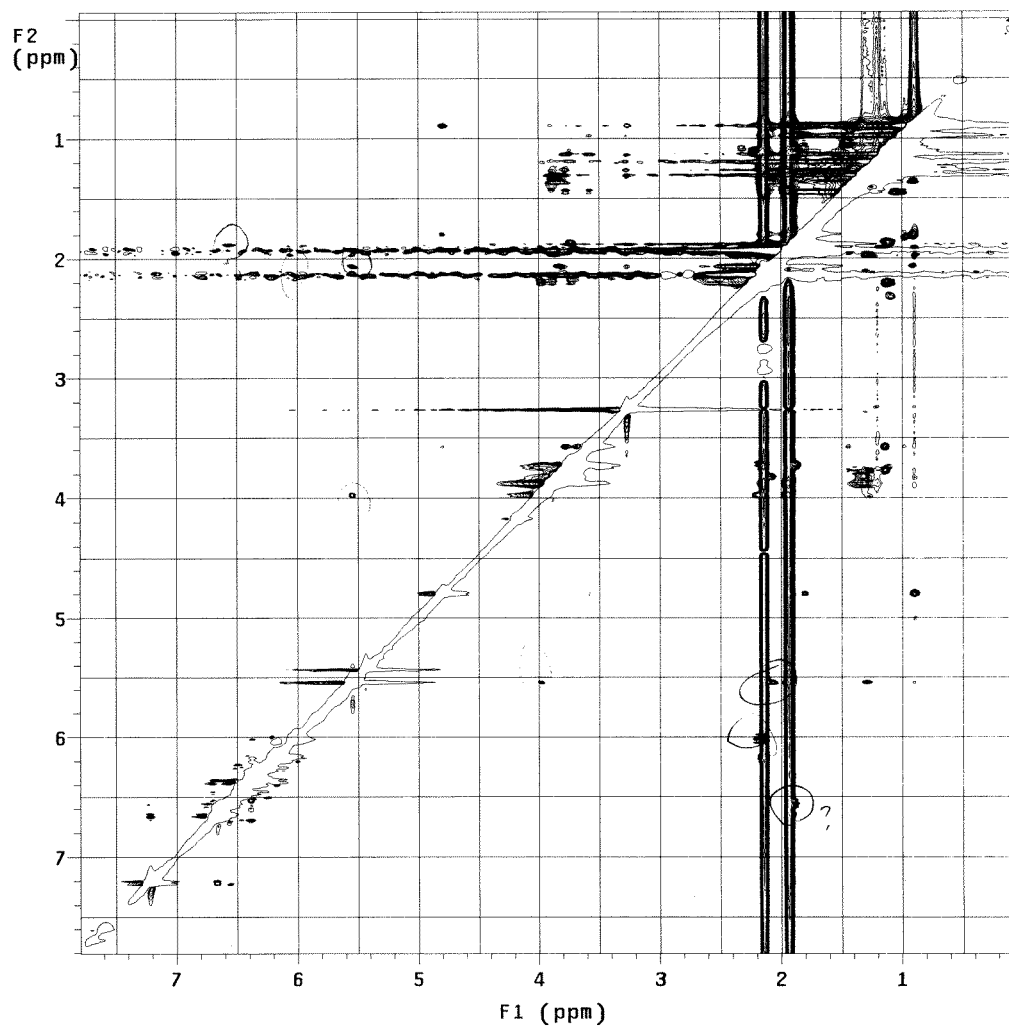

Figure S47. ROESY spectrum of **7** (500 MHz, CD<sub>3</sub>CN).

DAD1, 0.066 : 0.080 (39.4 mAU,%Fs) Ref=0.053 & 0.213 of A42MET2.D  
DAD1, 0.066 : 0.080 (39.4 mAU,%Fs) Ref=0.053 & 0.213 of A42MET2.D

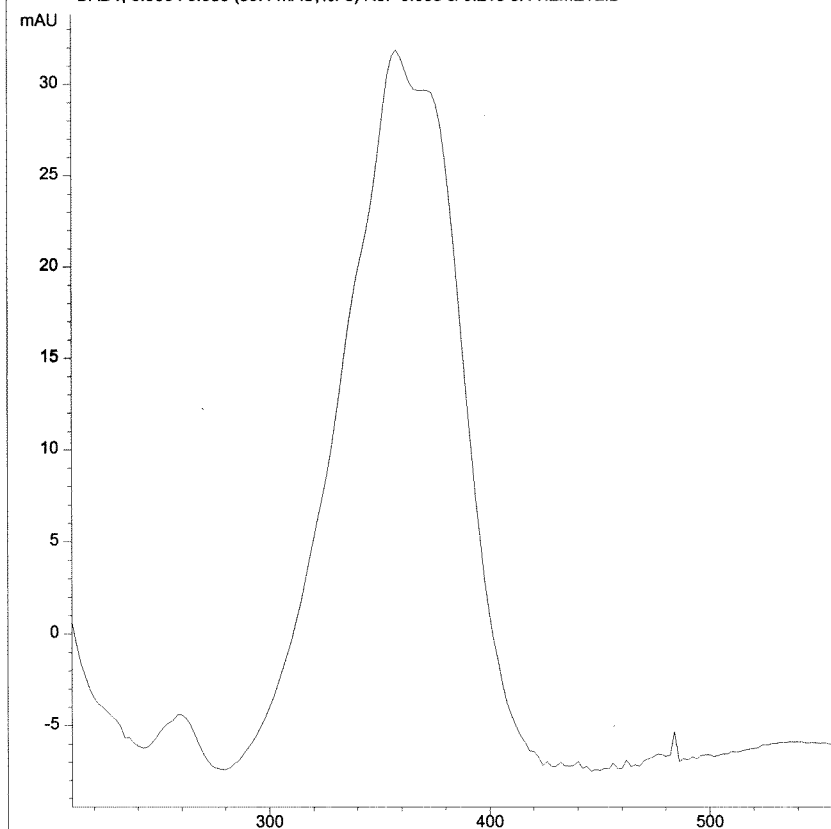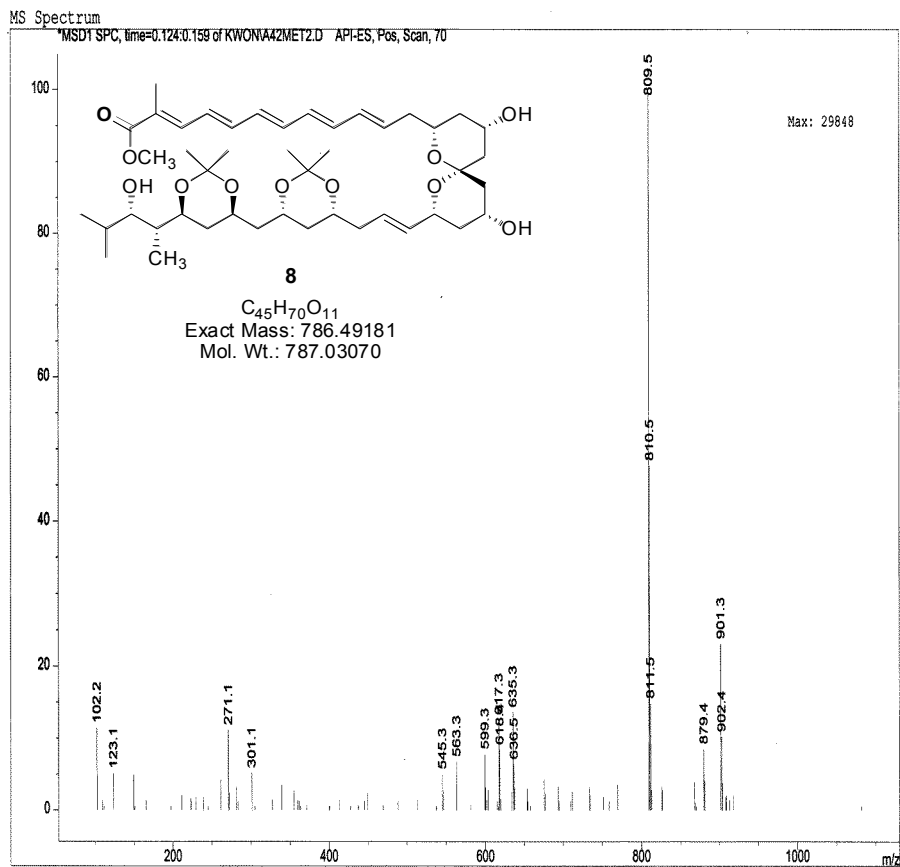

Figure S48. UV and ESI-MS spectra derived from HPLC-DAD-MSD of compound 8.

Q140\_692\_SS7\_acetonide\_4\_2\_methanolysis (500 MHz, CD<sub>3</sub>CN)

Archive directory: /export/home/fenical/kwon/vnmrsys/data  
Sample directory:  
File: PROTON

Pulse Sequence: s2pu1

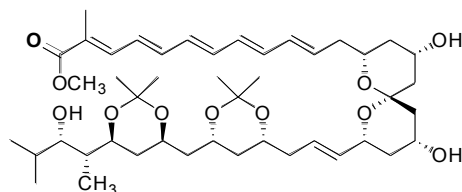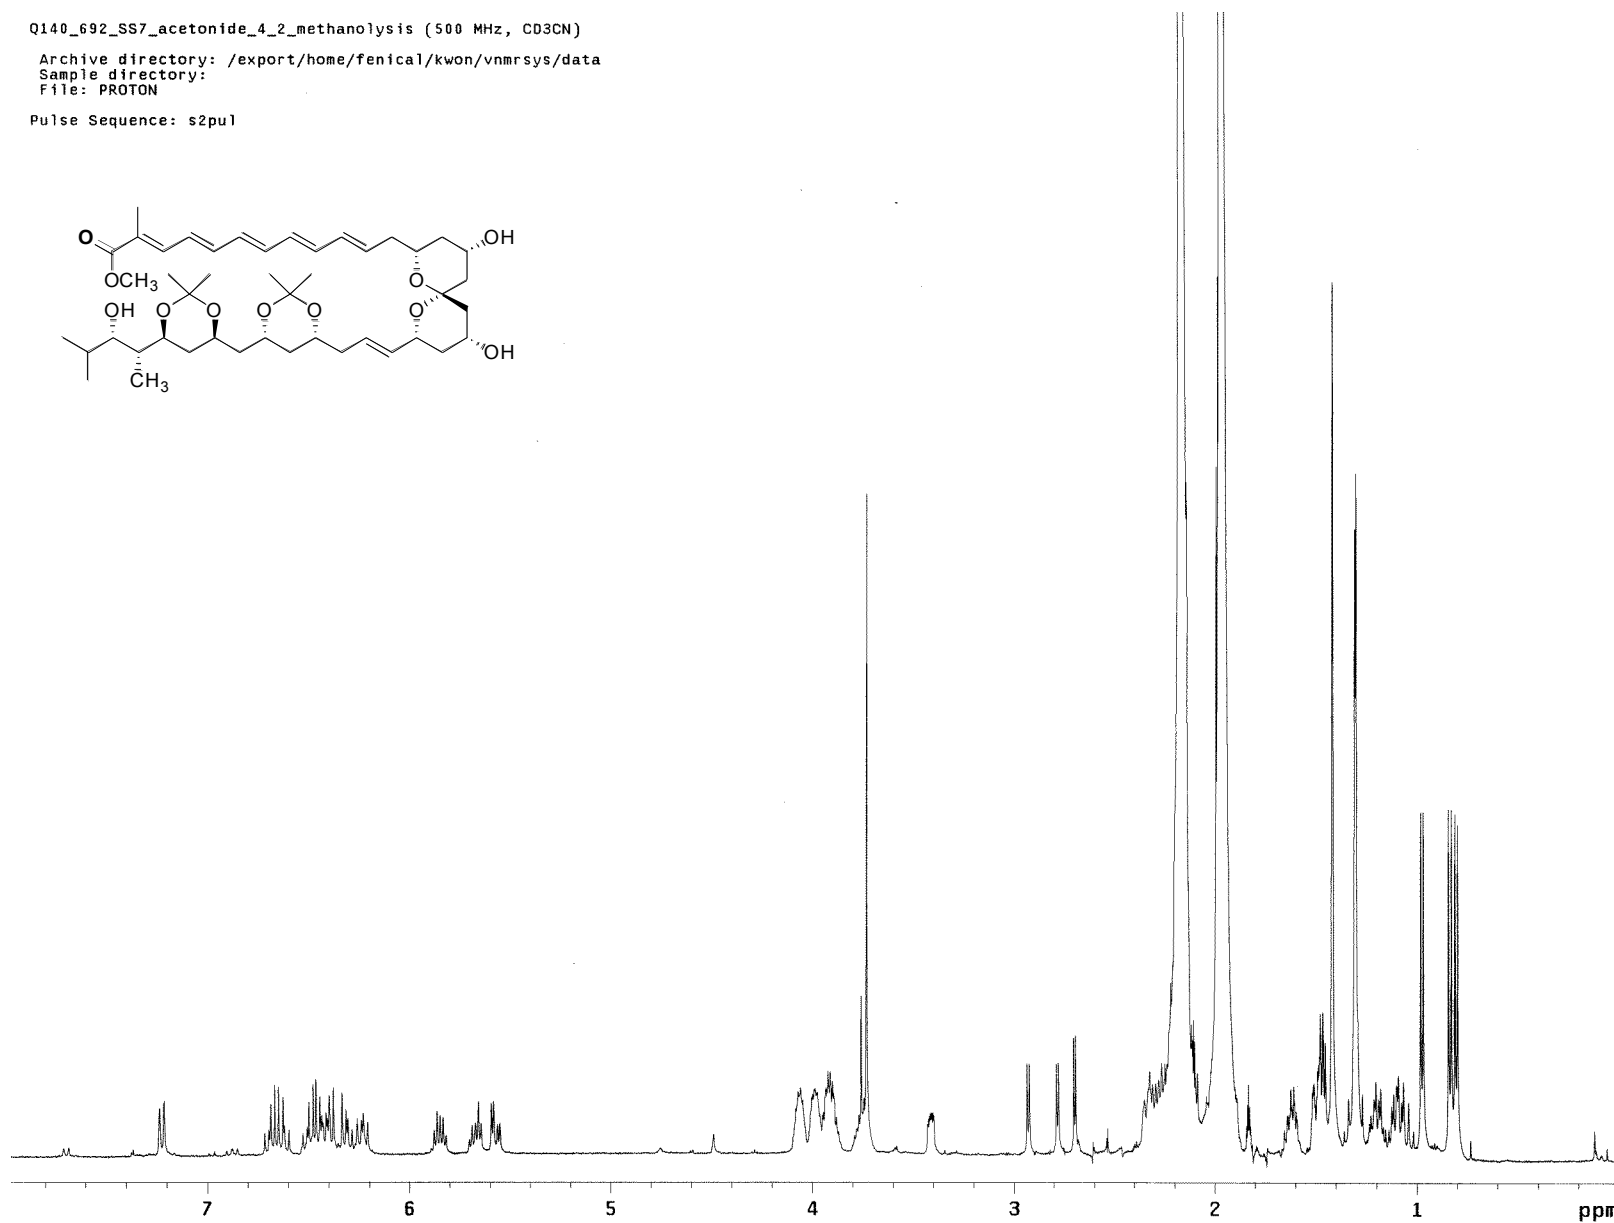

**Figure S49.** <sup>1</sup>H NMR spectrum of **8** (500 MHz, CD<sub>3</sub>CN).

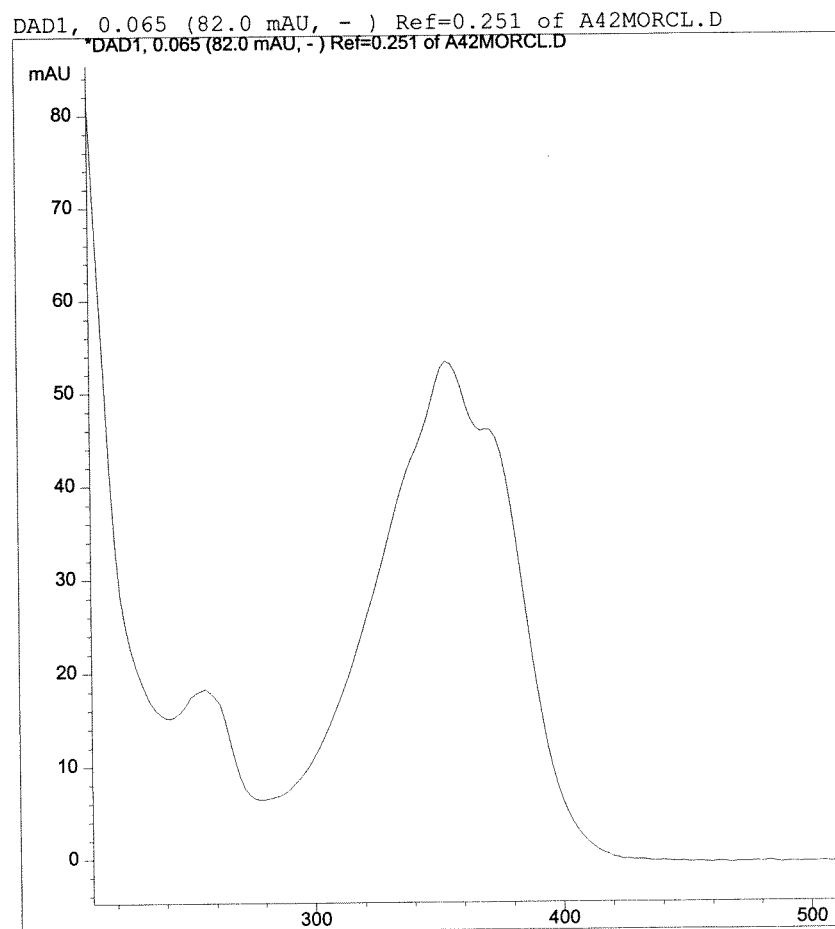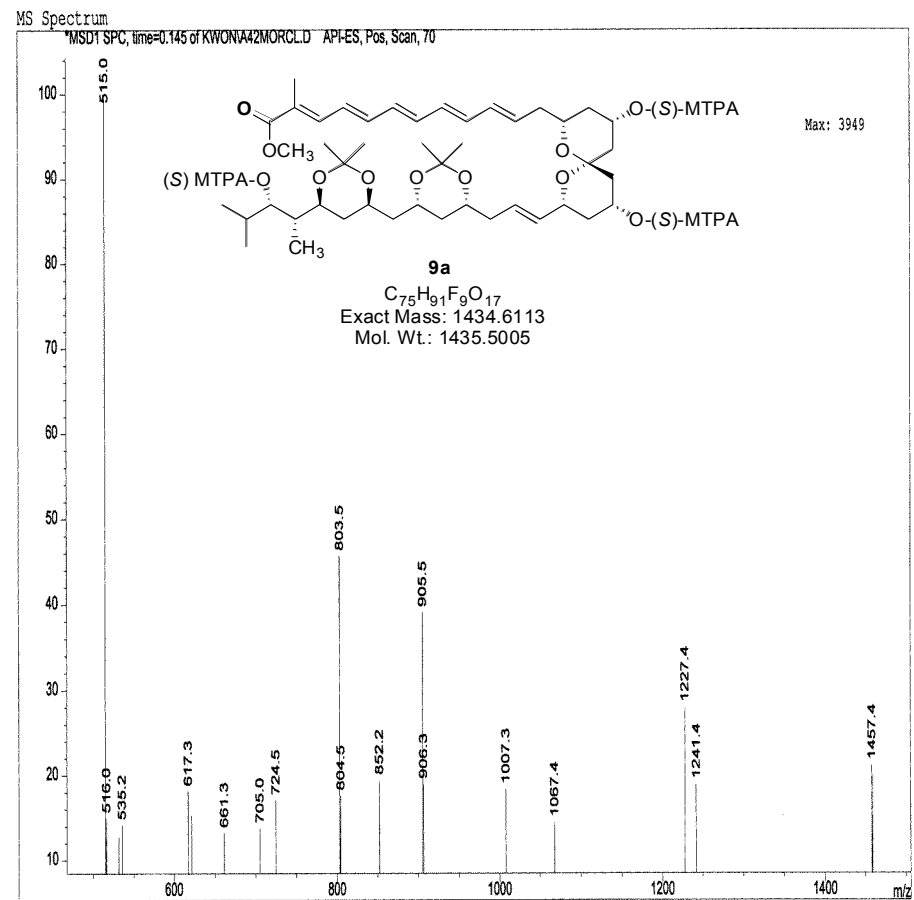

**Figure S50.** UV and ESI-MS spectra derived from HPLC-DAD-MSD of compound **9a**.

Q140\_692\_SS7\_Acetonide42\_Metha\_Tri\_(S)\_mosher\_ester (500 MHz, CD<sub>3</sub>CN)

Archive directory: /export/home/fenical/kwon/vnmrsys/data  
Sample directory:

Pulse Sequence: s2pu1

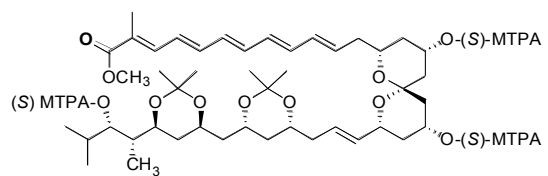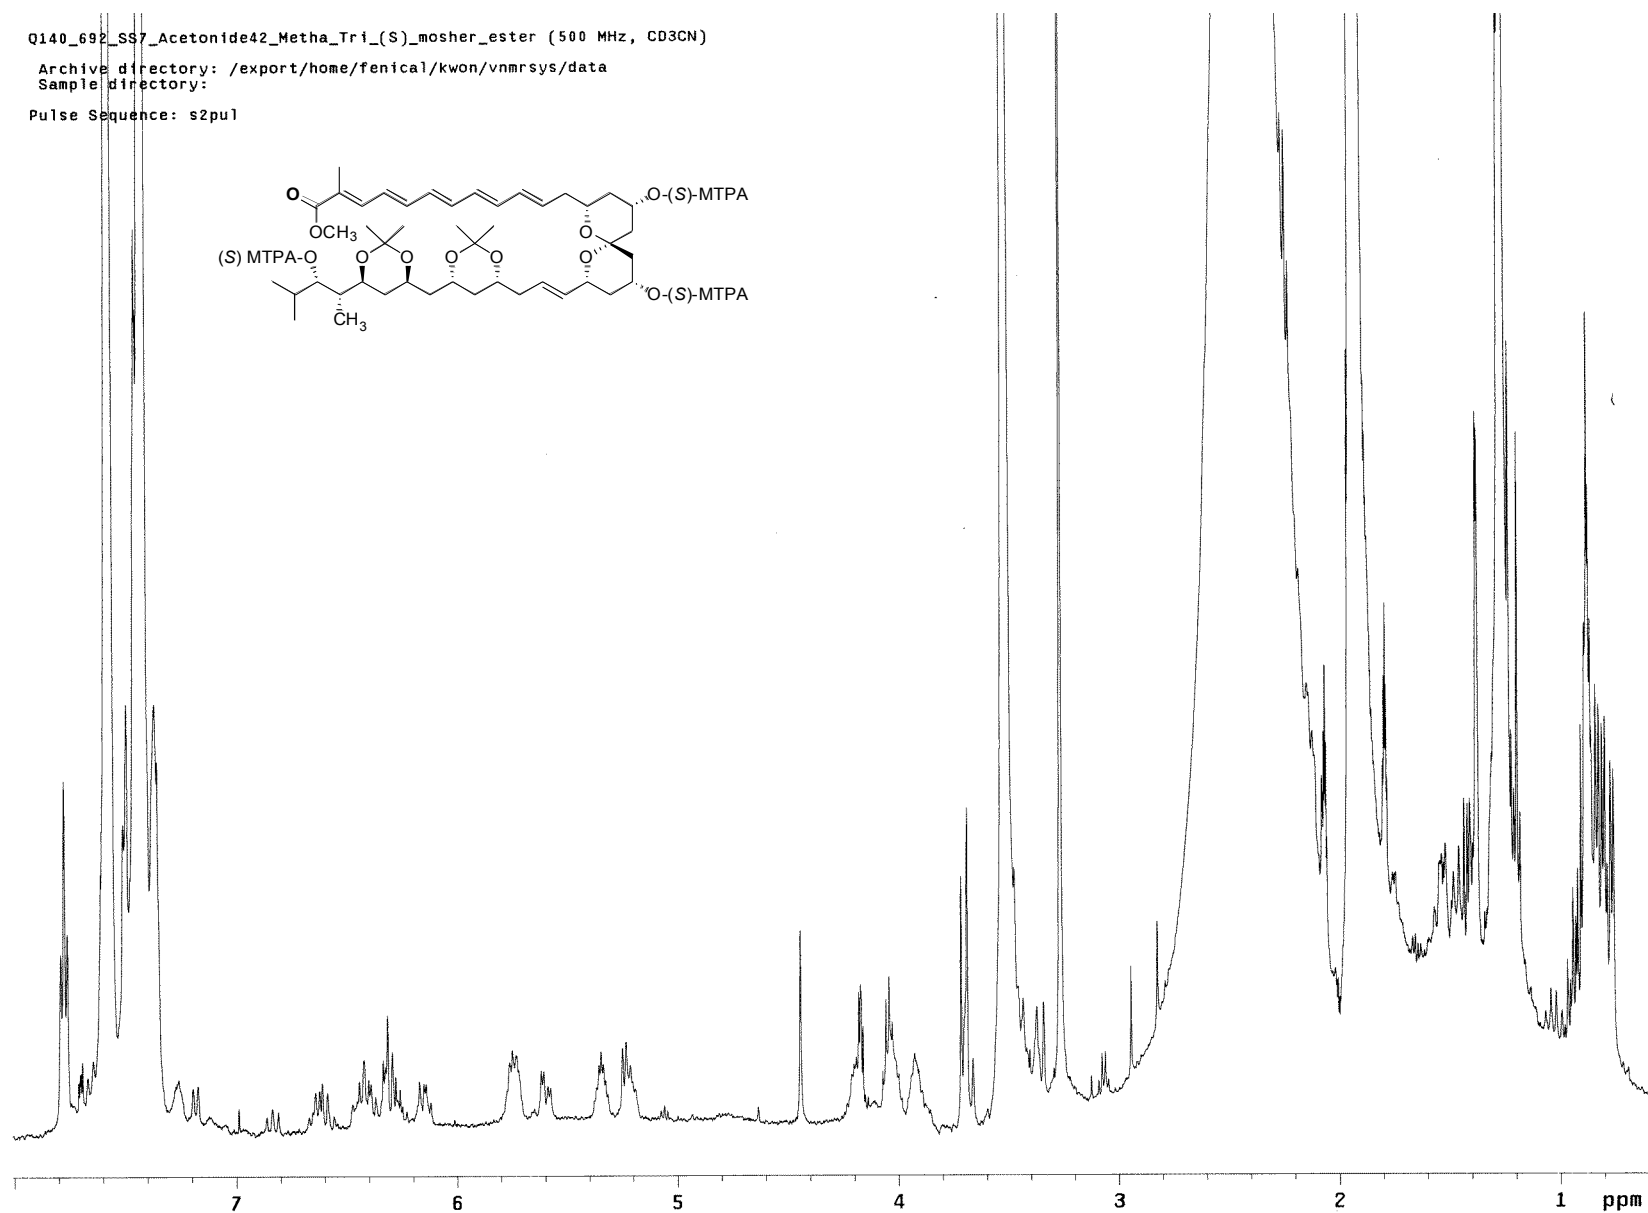

Figure S51. <sup>1</sup>H NMR spectrum of **9a** (500 MHz, CD<sub>3</sub>CN).



Q140\_692\_SSA42\_Meth\_S\_tri\_mosher\_ester

Archive directory: /export/home/fenical/kwon/vnmrsys/data  
Sample directory: Q140\_692\_SS\_A47\_Meth\_Tri\_S\_mosher\_ester\_COSY\_19oct2005  
File: gCOSY

Pulse Sequence: gCOSY

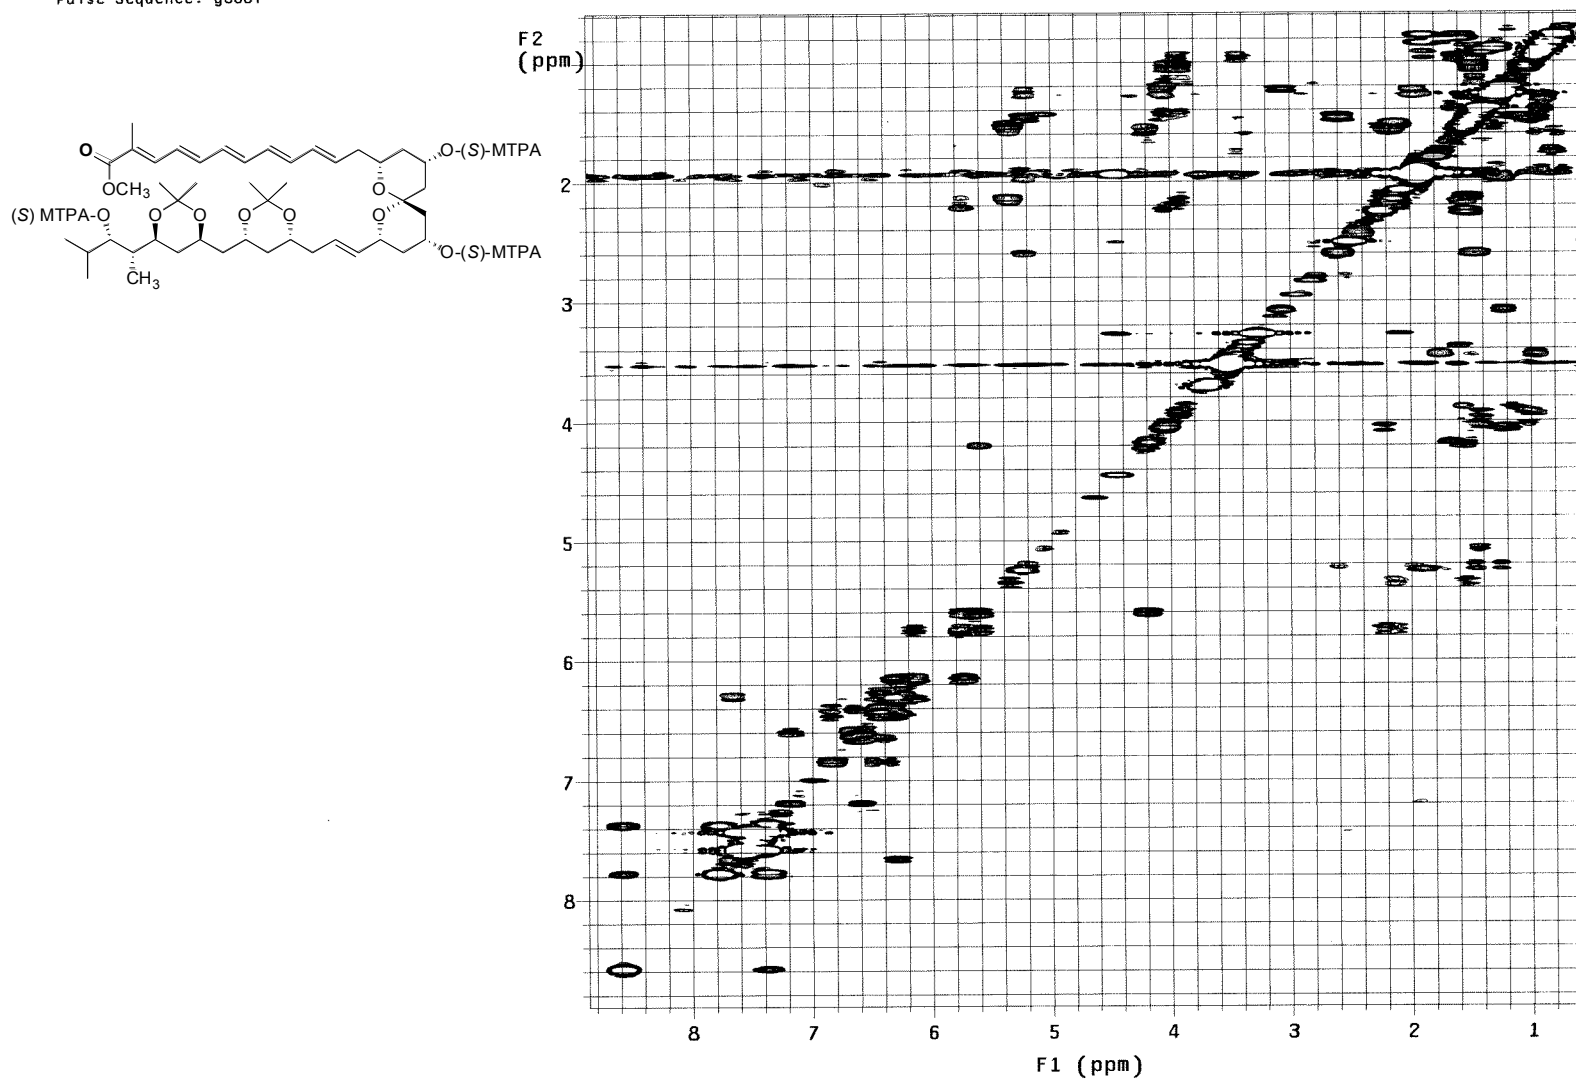

Figure S52.  $^1\text{H}$ - $^1\text{H}$  COSY spectrum of **9a** (500 MHz,  $\text{CD}_3\text{CN}$ ).

DAD1, 0.068 : 0.095 (26.1 mAU,%Fs) Ref=0.055 & 0.268 of A42MOSCL.D  
DAD1, 0.068 : 0.095 (26.1 mAU,%Fs) Ref=0.055 & 0.268 of A42MOSCL.D

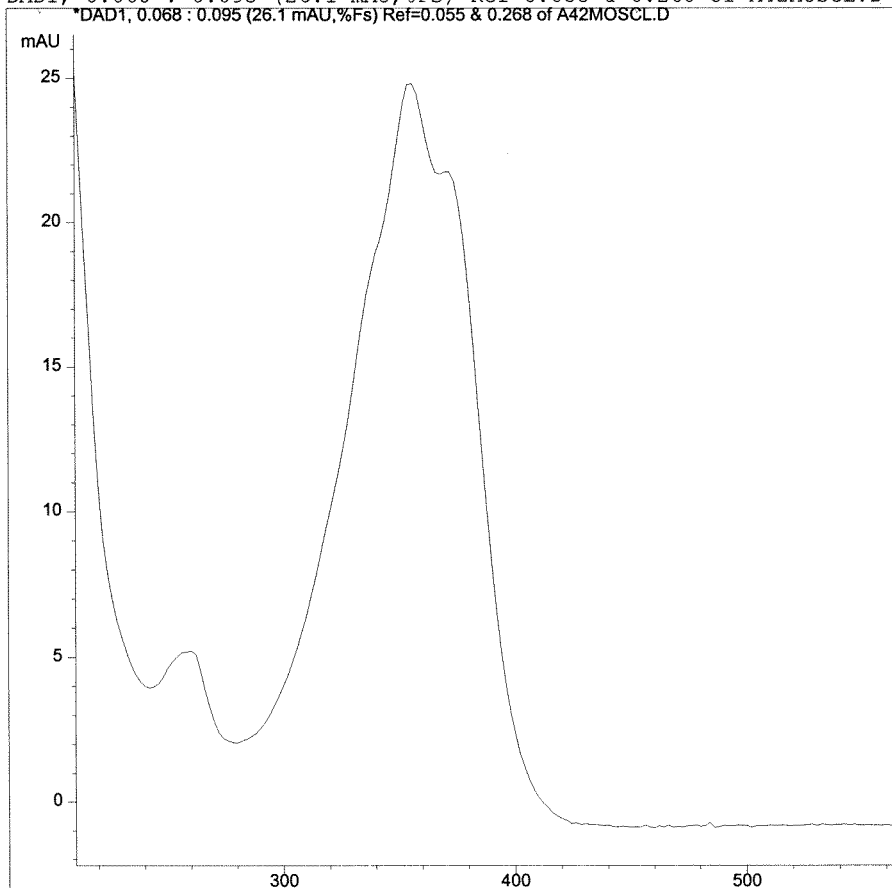

MS Spectrum

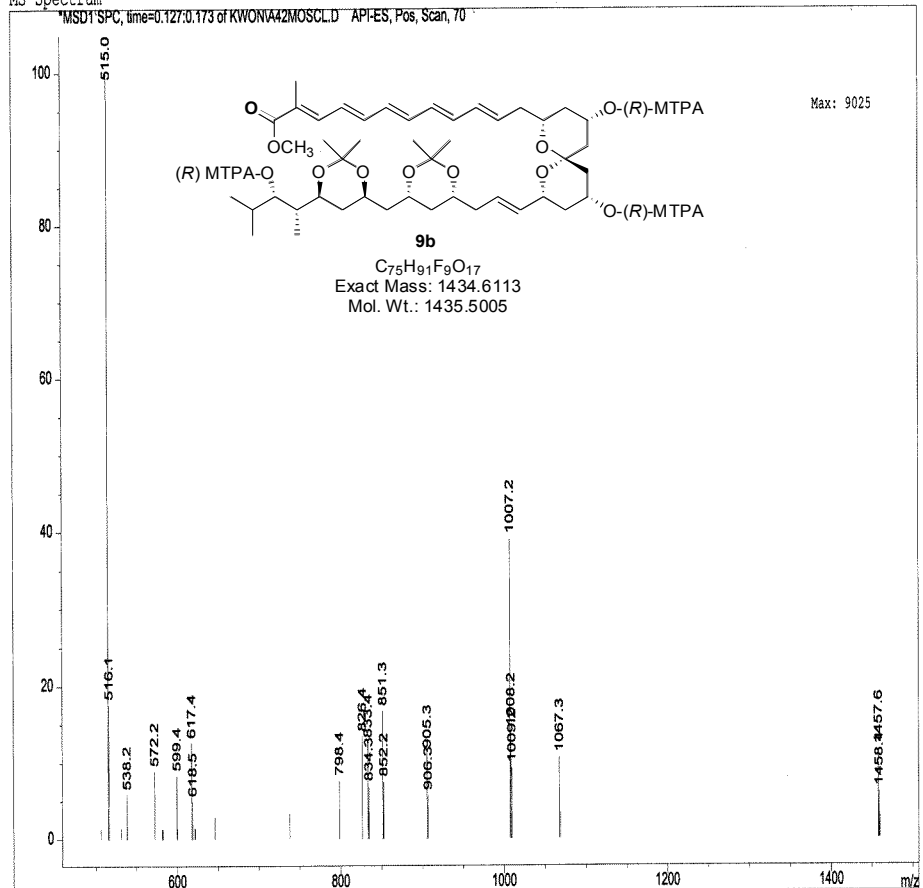

Figure S53. UV and ESI-MS spectra derived from HPLC-DAD-MSD (MeCN-H<sub>2</sub>O) of compound 9b.

Q140\_692\_SS7\_Acetonide42\_Metha\_Tri\_(R)\_mosher\_ester (500 MHz, CD3CN)

Archive directory: /export/home/fenical/kwon/vnmrsys/data

Sample directory:

File: PROTON

Pulse Sequence: s2pu1

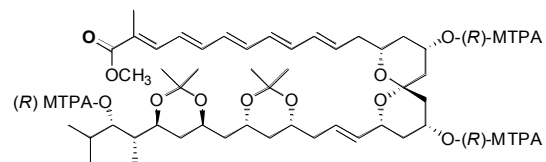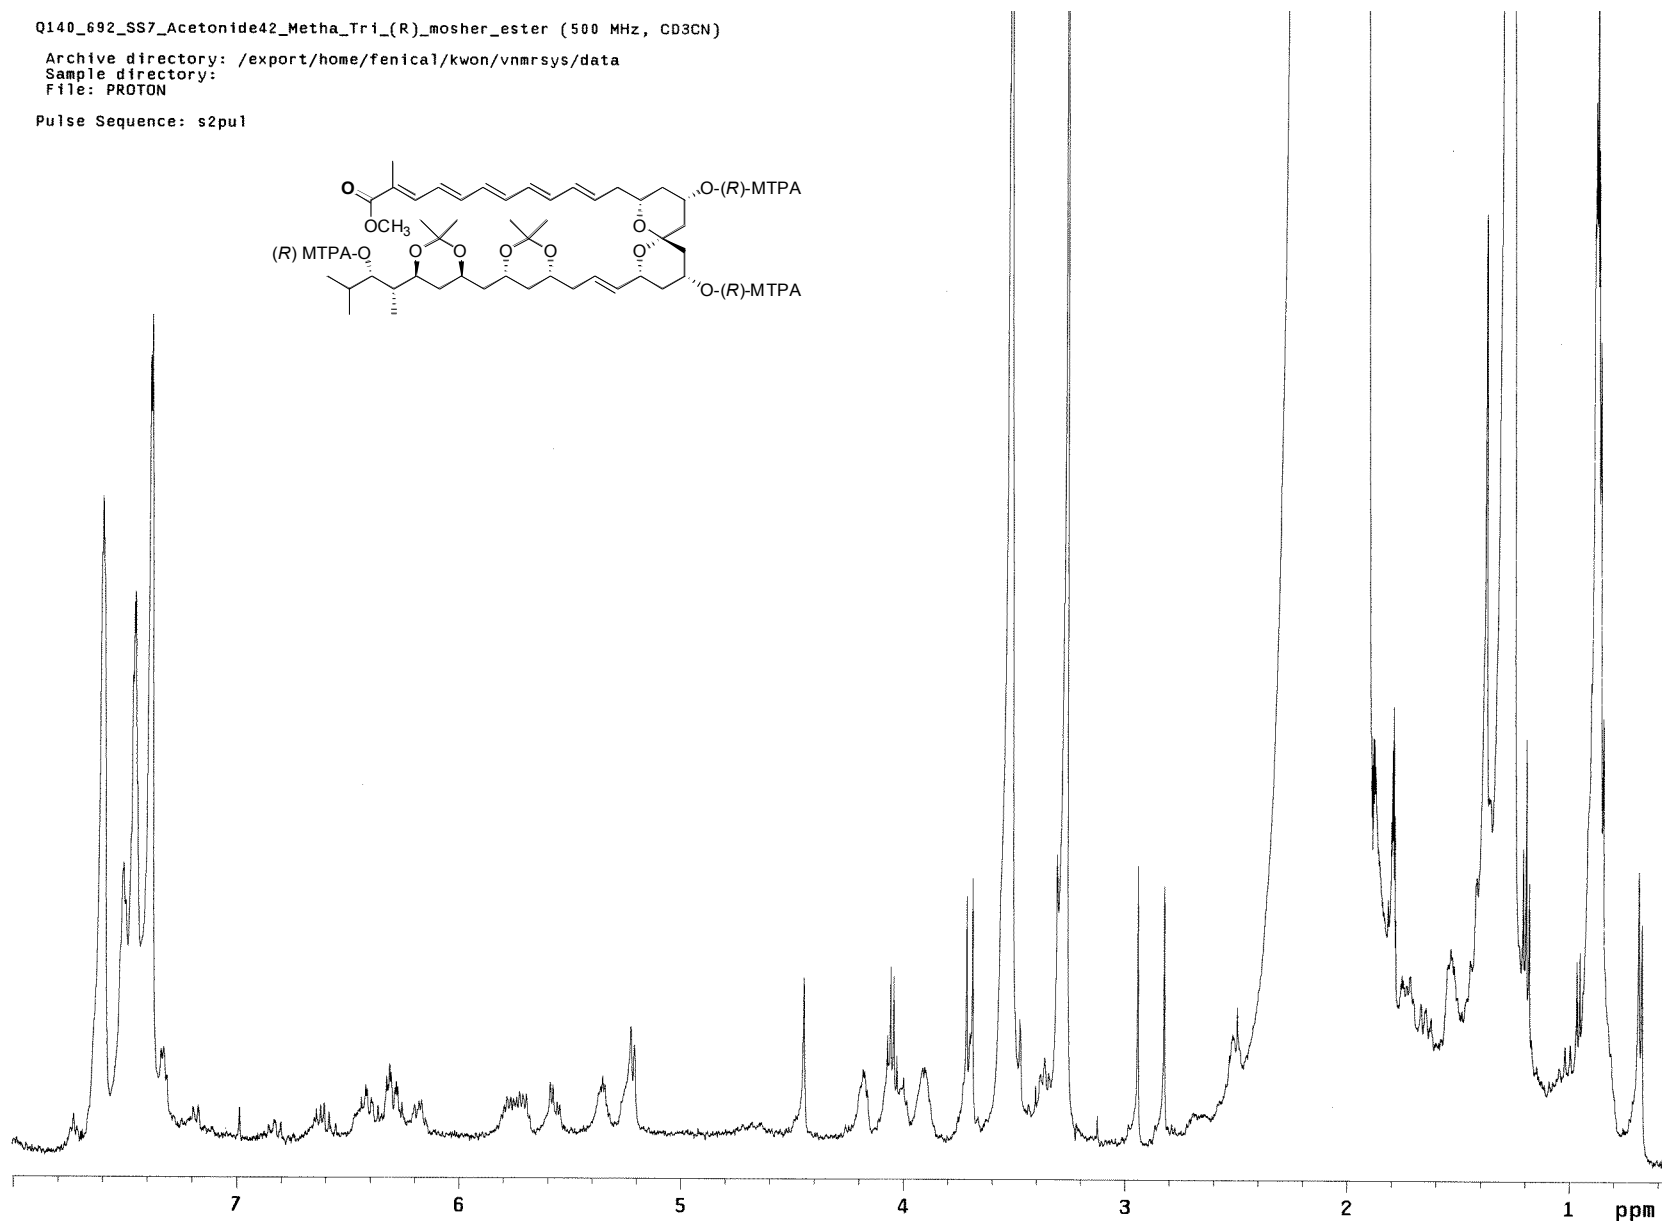

Figure S54. <sup>1</sup>H NMR spectrum of **9b** (500 MHz, CD<sub>3</sub>CN).

Q140\_692\_SS7\_A42\_M\_(R)\_tri\_mosher  
\_ester (500 MHz, CD<sub>3</sub>CN)

Archive directory: /export/home/fenical/kwon/vnmrSYS/data  
Sample directory: Q140\_692\_SS7\_A42\_Meth\_R\_tmosher\_ester\_COSY\_18Oct2005  
File: gCOSY

Pulse Sequence: gCOSY

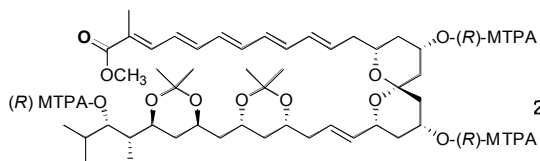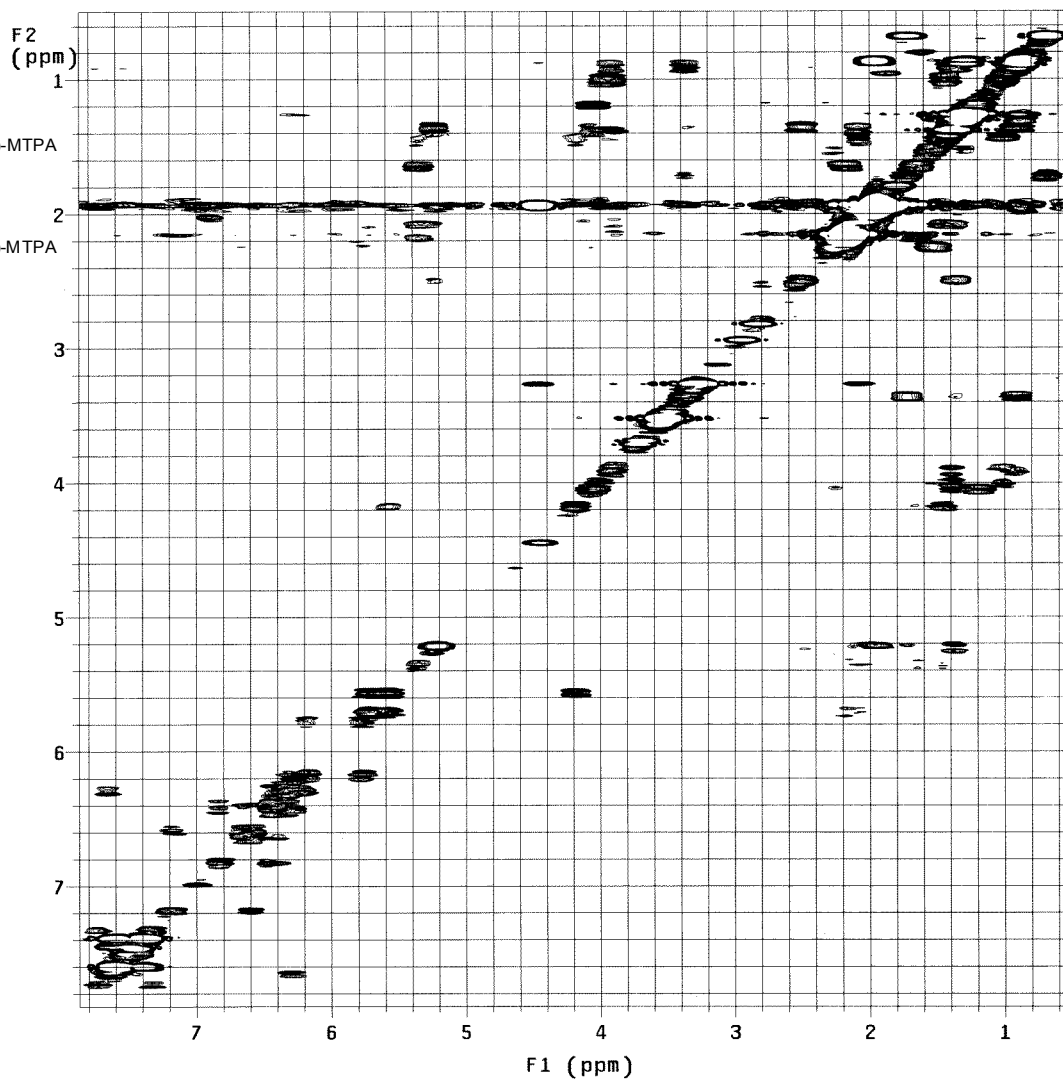

Figure S55. <sup>1</sup>H-<sup>1</sup>H COSY spectrum of **9b** (500 MHz, CD<sub>3</sub>CN).

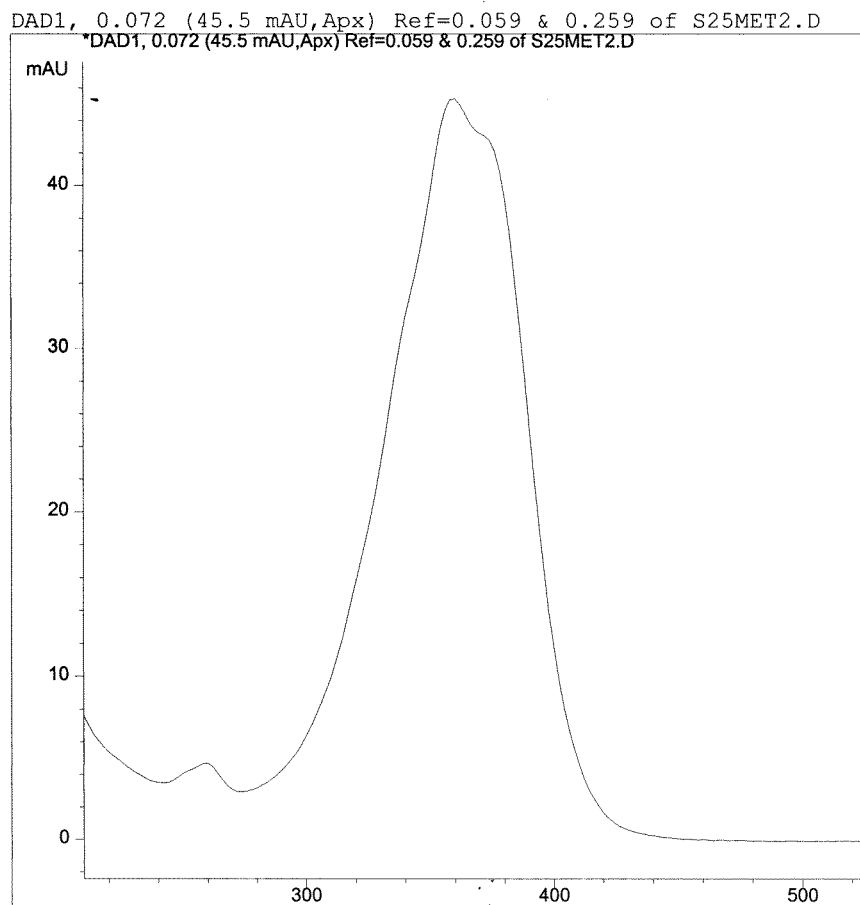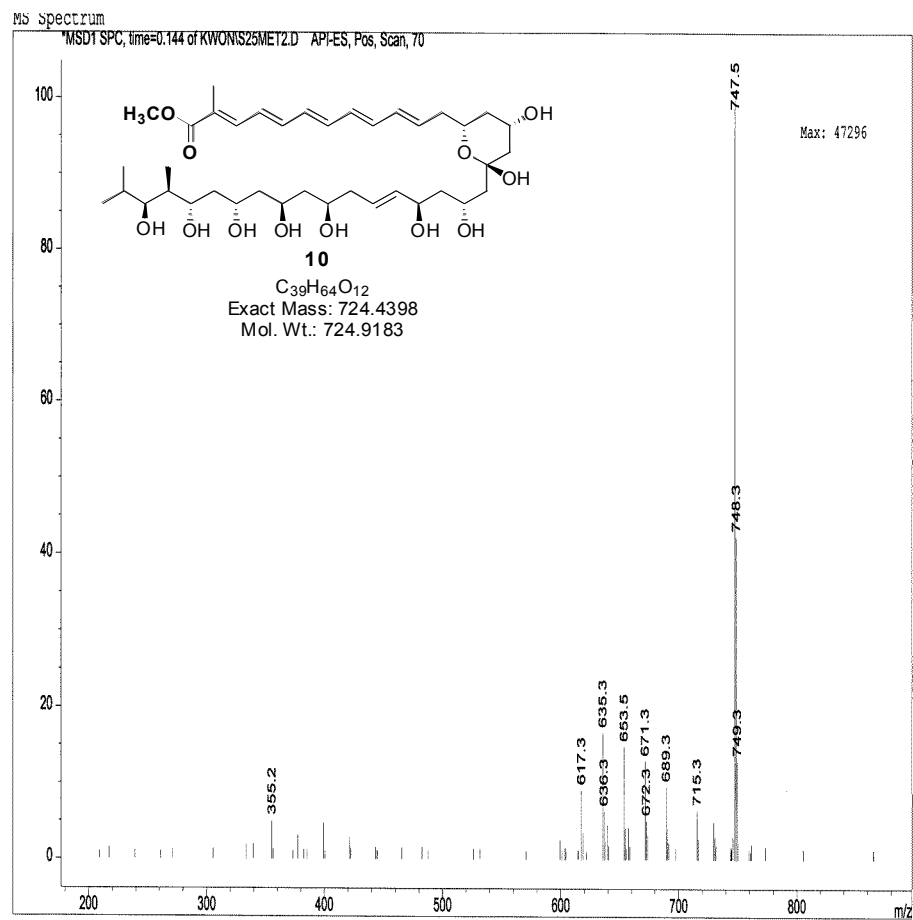

**Figure S56.** UV and ESI-MS spectra derived from HPLC-DAD-MSD (MeCN-H<sub>2</sub>O) of compound **10**.

Q140\_692\_m1\_8\_Methanolysis (500 MHz, DMSO-d6)

Archive directory: /export/home/fenical/kwon/vnmrsys/data

Sample directory:

File: PROTON

Pulse Sequence: s2pu1

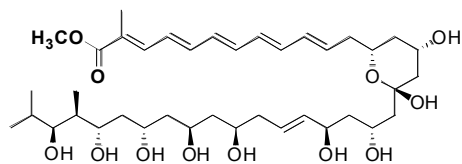

**10**

C<sub>39</sub>H<sub>64</sub>O<sub>12</sub>

Exact Mass: 724.4398

Mol. Wt.: 724.9183

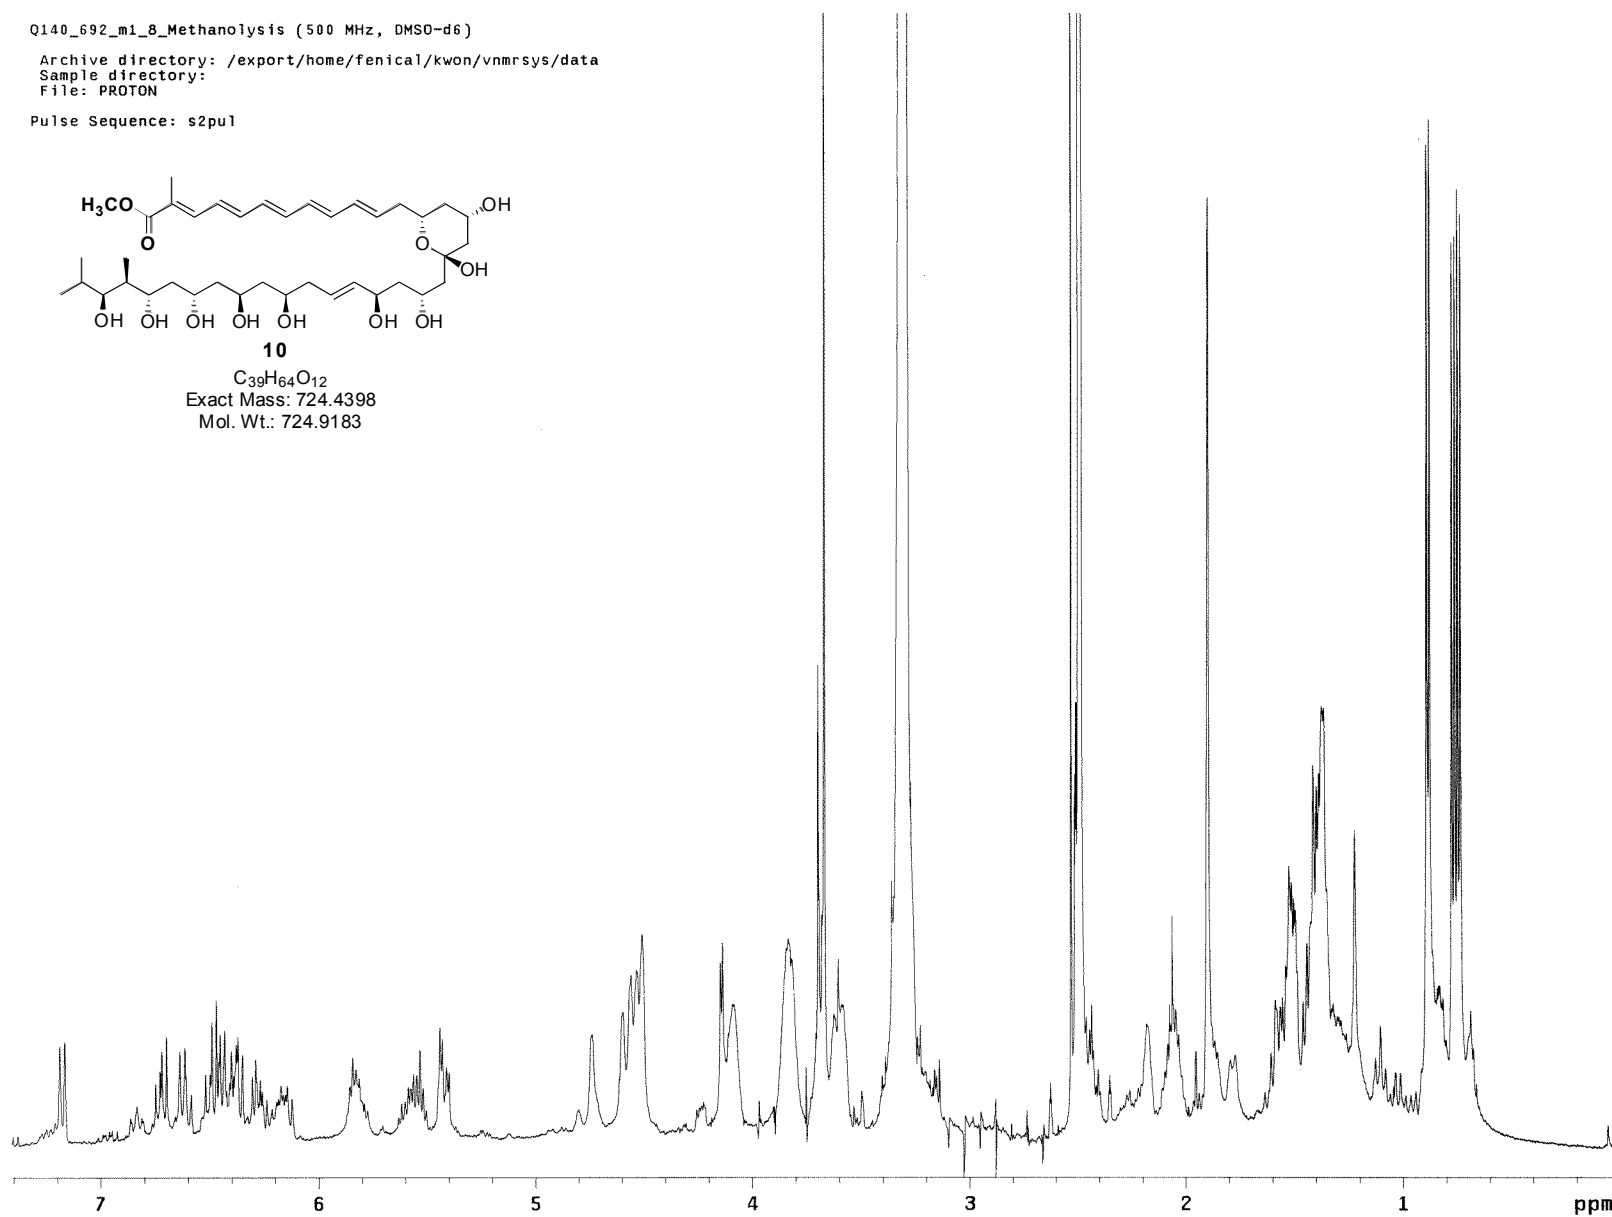

**Figure S57.** <sup>1</sup>H NMR spectrum of compound **10** (500 MHz, DMSO-*d*<sub>6</sub>).

Q140\_692\_m1\_8\_methanolysis\_HMQC (500 MHz, DMSO-d6)

Archive directory: /export/home/fenical/kwon/vnmrsys/data

Sample directory: kwon\_28Sep2005

File: gHMQC

Pulse Sequence: gHMQC

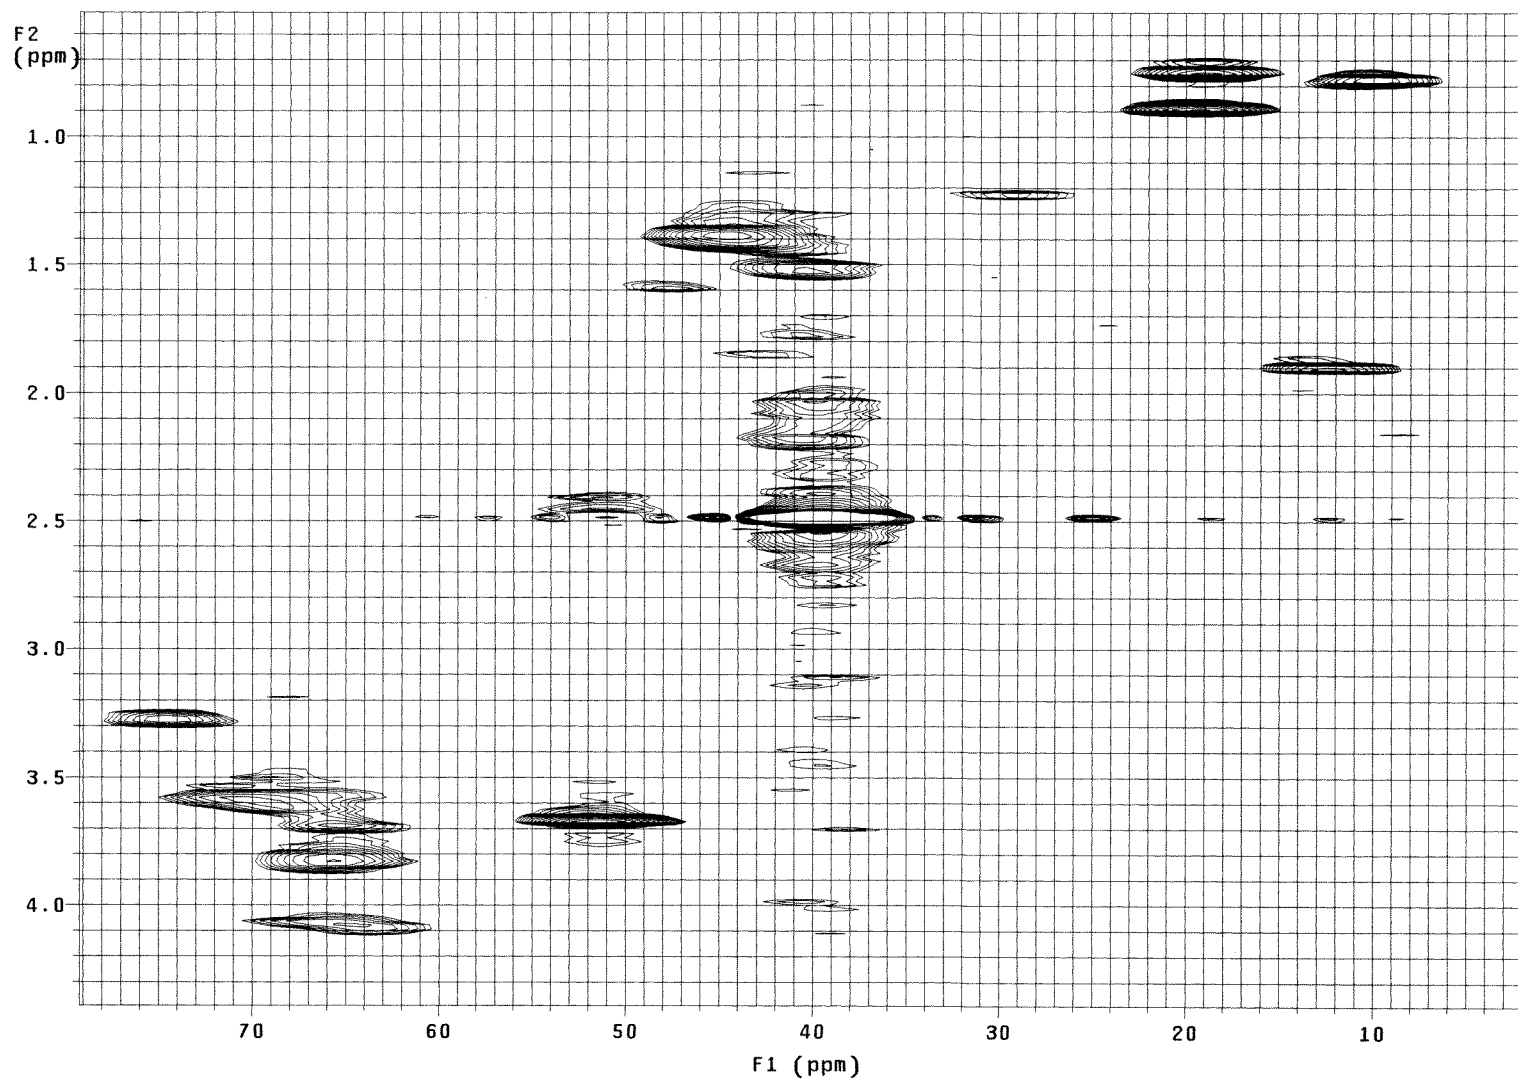

**Figure S58.** Expanded gHMQC spectrum of **10** (500 MHz, DMSO- $d_6$ ).

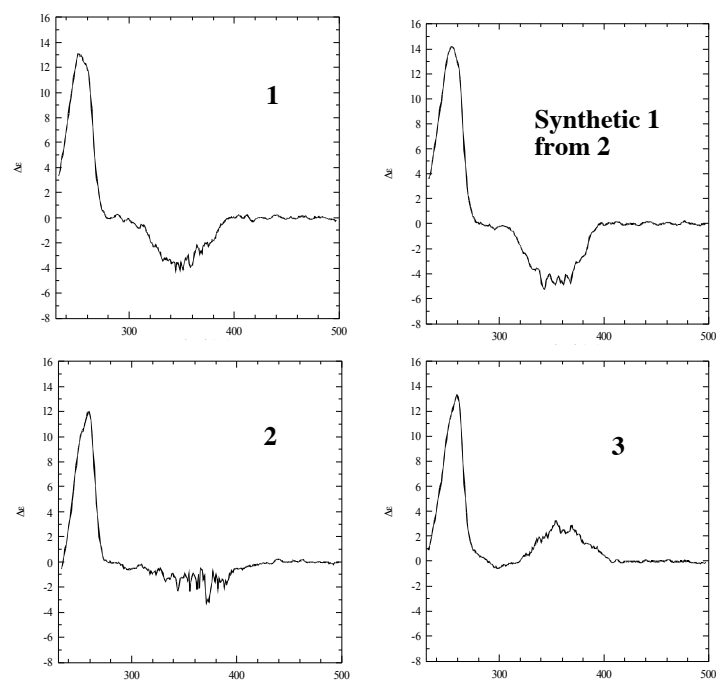

**Figure S59.** CD spectra of **1**, synthetic **1**, **2**, and **3** in methanol.
